# Supplementary material for: Chemical upcycling of poly(bisphenol A carbonate) to vinylene carbonates through organocatalysis
Source: Royal Society of Chemistry journal article supplement (doi:10.1039/d2gc04413g), 2023-01-01
Supplement: d2gc04413g1.pdf [file d2gc04413g1.pdf]

## Supporting Information

### Chemical Upcycling of Poly(bisphenol A carbonate) to Vinylene Carbonates through Organocatalysis

**Killian Onida,<sup>a</sup> Mohamad Fayad,<sup>a</sup> Sébastien Norsic,<sup>b</sup> Olivier Boyron<sup>b</sup> and  
Nicolas Duguet<sup>a,\*</sup>**

<sup>a</sup> Univ. Lyon, Université Claude Bernard Lyon 1, CNRS, INSA-Lyon, CPE-Lyon, Institut de Chimie et Biochimie Moléculaires et Supramoléculaires, ICBMS, UMR 5246, Equipe CAtalyse, SYnthese et ENvironnement (CASyEN), Bâtiment Lederer, 1 rue Victor Grignard, F-69100 Villeurbanne, France.

<sup>b</sup> Univ. Lyon, Université Claude Bernard Lyon 1, CPE Lyon, CNRS UMR 5128, Laboratory of Catalysis Polymerization Processes and Materials (CP2M), Bat 308F, 43 Bd du 11 Novembre 1918, F-69616 Villeurbanne, France.

E-mail: [nicolas.duguet@univ-lyon1.fr](mailto:nicolas.duguet@univ-lyon1.fr)

#### Table of contents

|                                                                                                                                    |     |
|------------------------------------------------------------------------------------------------------------------------------------|-----|
| 1. General Information .....                                                                                                       | S2  |
| 2. GC Method .....                                                                                                                 | S2  |
| 3. General procedure for the preparation of vinylene carbonates from $\alpha$ -hydroxyketone and poly(bisphenol A carbonate) ..... | S2  |
| 4. Scale-up procedure for the preparation vinylene carbonate from poly(bisphenol A carbonate) ....                                 | S2  |
| 5. Procedures for the preparation vinylene carbonate from waste materials .....                                                    | S3  |
| 6. Characterization data of vinylene carbonates .....                                                                              | S5  |
| 7. NMR spectra of vinylene carbonates .....                                                                                        | S10 |
| 8. NMR Mechanistic studies .....                                                                                                   | S25 |
| 9. Mechanism proposal .....                                                                                                        | S31 |
| 10. High-resolution mass spectrometry of vinylene carbonates .....                                                                 | S32 |
| 11. Size-exclusion chromatography (SEC) .....                                                                                      | S43 |

## 1. General Information

All reagents and solvents were commercially available and used without any further purification. Poly(Bisphenol A carbonate) was purchased from Sigma Aldrich ( $M_w = 45,000 \text{ g}\cdot\text{mol}^{-1}$ ,  $\bar{D} = 1.77$ ). Nuclear magnetic resonance spectra were recorded on a Bruker DRX 300, Bruker ALS 300 ( $^1\text{H}$ : 300 MHz,  $^{13}\text{C}$ : 75 MHz), Bruker ADVANCEIII 500, Bruker BBO probe, Bruker BBI probe ( $^1\text{H}$ : 500 MHz,  $^{13}\text{C}$ : 125 MHz). Chemical shifts are given with reference to residual  $\text{CHCl}_3$  central peaks: 7.26 ppm for proton, 77.16 ppm for carbon, respectively. J values are given in Hertz (Hz). Abbreviations are defined as follows: s = singlet, d = doublet, dd = doublet of doublets, t = triplet, q = quadruplet, hept = heptuplet, m = multiplet.

## 2. GC Method

GC method Gas chromatography (GC) analyses were performed using Shimadzu GC (GC-2025) apparatus equipped with a ZB-5-MS capillary column (30m length, 0.25 mm i.d., 0.50  $\mu\text{m}$  film thickness). The carrier gas was  $\text{N}_2$  at a total flow of 169.7 mL/min, a column flow at 1.65 mL/min and the injection mode is split (ratio 1:100). The column temperature was initially at 100°C for 1 min, and then was gradually increased to 260°C (25°C/min) and the temperature was kept at 260°C during 2.5 min. Finally, the temperature was increased to 315°C (45°C/min) and kept at 315°C during 5 min. The injector and FID temperature were respectively set at 300°C and 315°C.

## 3. General procedure for the preparation of vinylene carbonates from $\alpha$ -hydroxyketone and poly(bisphenol A carbonate)

The benzoin (1 mmol), poly(bisphenol A polycarbonate) (BPA-PC) ( $M_w = 45,000 \text{ g}\cdot\text{mol}^{-1}$ ,  $\bar{D} = 1.77$ , 2 mmol of carbonate functionality based on the repeating unit), 1,5,7-triazabicyclo[4.4.0]dec-5-ene (TBD) (0.1 mmol, 10 mol %) and 2-MeTHF (2mL) were introduced into a (10 mL) sample tube. The reaction mixture was stirred at room temperature for 16 h. Ethyl acetate (5 mL) was added to the reaction mixture. The resulting mixture was washed three times with 1M NaOH (5 mL) and twice with brine (5 mL). The organic layer was dried over anhydrous  $\text{MgSO}_4$ , filtered and the filtrate was concentrated under reduced pressure. The crude product was purified by column chromatography.

## 4. Scale-up procedure for the preparation vinylene carbonate from poly(bisphenol A carbonate)

Benzoin (10 mmol), poly(bisphenol A polycarbonate) (BPA-PC) (20 mmol of carbonate functionality based on the repeating unit), 1,5,7-triazabicyclo[4.4.0]dec-5-ene (TBD) (1 mmol, 10 mol %) and 2-MeTHF (40 mL) were introduced into a reaction flask. The reaction mixture was stirred at room temperature for 16 h. Ethyl acetate (50 mL) was added to the reaction mixture. The resulting mixture was washed three times with 1M NaOH (50 mL) and twice with brine (50 mL). The organic layer was dried over anhydrous  $\text{MgSO}_4$ , filtered and the filtrate was concentrated under reduced pressure. The crude vinylene carbonate was purified by recrystallization (EtOH). A solution of hydrochloric acid (5 M) was added to the aqueous layer until the pH reaches 1. The resulting mixture was extracted three times with ethyl acetate (50 mL). The resulting organic layer was dried over anhydrous  $\text{MgSO}_4$ , filtered and the filtrate was concentrated under reduced pressure. The crude bisphenol A was also purified by recrystallization (EtOH).

## 5. Procedures for the preparation vinylene carbonate from waste materials

### Vinylene carbonates from a compact disk (CD)

A compact disk was cut into 1-2 cm pieces. Then, 508 mg of the CD (2 mmol of the monomer unit hypothesizing that the CD is composed of 100% PC-BPA) was introduced in a 10-mL reaction tube along with benzoin (1 mmol), 1,5,7-triazabicyclo[4.4.0]dec-5-ene (TBD) (0.1 mmol, 10 mol%) and 2-methylTHF (2mL). The reaction mixture was stirred at 50°C for 16 h. Ethyl acetate (5 mL) was added to the reaction mixture. The resulting mixture was washed three times with 1M NaOH (5 mL) and twice with brine (5 mL). The organic layer was dried over anhydrous MgSO<sub>4</sub>, filtered and the filtrate was concentrated under reduced pressure. The crude product was purified by recrystallization (EtOH) to give vinylene carbonate **2**. A solution of hydrochloric acid (5M) was added to the aqueous layer until the pH reaches 1. The resulting mixture was extracted three times with ethyl acetate (5 mL). The second organic layer was dried over anhydrous MgSO<sub>4</sub>, filtered and the filtrate was concentrated under reduced pressure. The crude bisphenol A was also purified by recrystallization (EtOH).

### Vinylene carbonates from safety glasses

Used safety glasses were cut into small pieces (about 2 \* 10 mm). The polycarbonate pieces (508 mg, 2 mmol of the monomer unit hypothesizing that the safety glasses are composed of 100% PC-BPA) were introduced in a 10-mL reaction tube and suspended in 2-methylTHF (2 mL). Benzoin (212 mg, 1 mmol) and 1,5,7-triazabicyclo[4.4.0]dec-5-ene (TBD) (13.9 mg, 0.1 mmol, 10 mol%) were next introduced. The reaction tube was sealed and the reaction mixture was stirred at 50°C for 16 h. Ethyl acetate (10 mL) was added to the reaction mixture. The resulting mixture was washed three times with 1M NaOH (10 mL) and twice with brine (10 mL). The organic layer was dried over anhydrous MgSO<sub>4</sub>, filtered and the filtrate was concentrated under reduced pressure to give a yellow oil. The crude product was purified by column chromatography (pentane/Et<sub>2</sub>O 90:10) to give vinylene carbonate **2** (157 mg, 66%) as a yellowish solid. A solution of hydrochloric acid (5 M) was added to the aqueous layer until the pH reaches 1. The resulting mixture was extracted three times with ethyl acetate (10 mL). The combined organic layers were washed twice with brine (10 mL), dried over anhydrous MgSO<sub>4</sub>, filtered and the filtrate was concentrated under reduced pressure to give BPA (177 mg, 78% yield based on the limiting reagent) as a slightly orange solid.

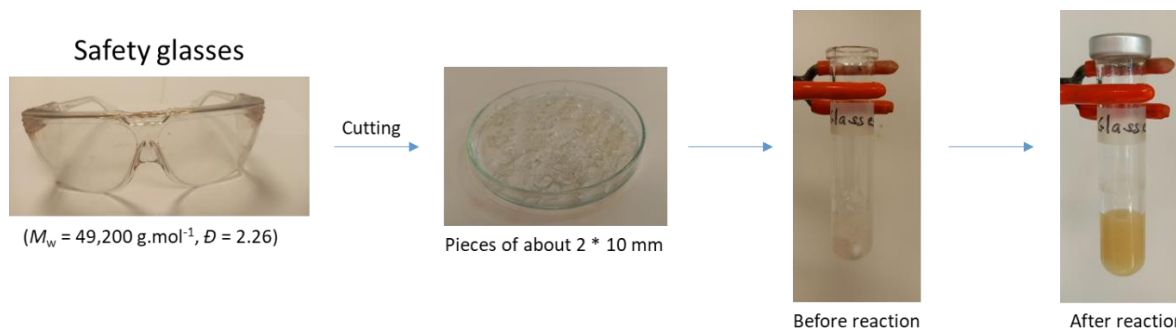

Figure S1. Depolymerisation of polycarbonate contained in safety glasses.

## Vinylene carbonates from a polycarbonate plate

A polycarbonate plate was cut into small pieces (about 2 \* 10 mm). Benzoin (212 mg, 1 mmol) and 1,5,7-triazabicyclo[4.4.0]dec-5-ene (TBD) (13.9 mg, 0.1 mmol, 10 mol%) were introduced in a 10-mL reaction tube and dissolved in 2-methylTHF (4 mL). The polycarbonate pieces (508 mg, 2 mmol of the monomer unit hypothesizing that the safety glasses are composed of 100% PC-BPA) were progressively introduced in the tube. The reaction tube was sealed and the reaction mixture was stirred at 70°C for 24 h. Ethyl acetate (10 mL) was added to the reaction mixture. The resulting mixture was washed three times with 1M NaOH (10 mL) and twice with brine (10 mL). The organic layer was dried over anhydrous MgSO<sub>4</sub>, filtered and the filtrate was concentrated under reduced pressure to give a yellow oil. The crude product was purified by column chromatography (pentane/Et<sub>2</sub>O 90:10) to give vinylene carbonate **2** (88 mg, 37%) as a yellowish solid. A solution of hydrochloric acid (5 M) was added to the aqueous layer until the pH reaches 1. The resulting mixture was extracted three times with ethyl acetate (10 mL). The combined organic layers were washed twice with brine (10 mL), dried over anhydrous MgSO<sub>4</sub>, filtered and the filtrate was concentrated under reduced pressure to give BPA (99 mg, 43% yield based on the limiting reagent) as a white solid.

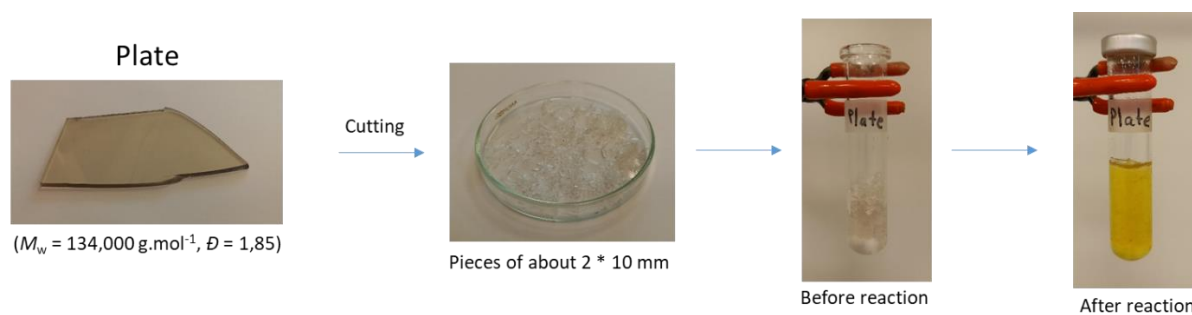

**Figure S2.** Depolymerisation of polycarbonate contained in a polycarbonate plate.

## 6. Characterization data of vinyene carbonates

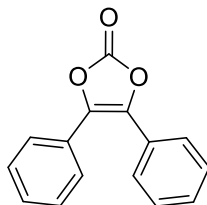

**4,5-Diphenyl-1,3-dioxol-2-one (2).** The title compound was prepared using benzoin (212 mg, 1 mmol), BPA-PC (508 mg, 2 mmol), TBD (14 mg, 0.1 mmol, 10 mol%) and 2-methylTHF (2 mL) following the general procedure. The product was purified by flash chromatography (ether/pentane 10:90) to give **2** (231 mg, 97%) as a white solid. Mp = 72–74 °C. **<sup>1</sup>H NMR** (300 MHz, CDCl<sub>3</sub>): δ<sub>H</sub> 7.61 – 7.49 (m, 4H), 7.48 – 7.38 (m, 6H). **<sup>13</sup>C NMR** (75 MHz, CDCl<sub>3</sub>): δ<sub>C</sub> 151.87 (C=O), 137.20 (2 C<sub>q</sub>), 130.22 (2 CH<sup>Ar</sup>), 129.10 (4 CH<sup>Ar</sup>), 126.61 (4 CH<sup>Ar</sup>), 125.67 (2 C<sub>q</sub>). **MS (HRMS):** C<sub>15</sub>H<sub>11</sub>O<sub>3</sub> [M+H]<sup>+</sup> Meas. m/z = 239.0702 for 239.0703, C<sub>15</sub>H<sub>10</sub>NaO<sub>3</sub> [M+Na]<sup>+</sup> Meas. m/z = 261.0522 for 261.0522, C<sub>30</sub>H<sub>20</sub>NaO<sub>6</sub> [2M+Na]<sup>+</sup> Meas. m/z = 499.1153 for 499.1152.

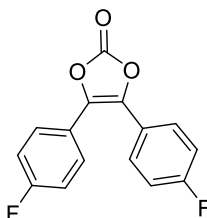

**4,5-Bis(4-fluorophenyl)-1,3-dioxol-2-one (3).** The title compound was synthesized from 4,4'-difluorobenzoin (248 mg, 1 mmol), TBD (14 mg, 0.1 mmol, 10 mol%) and 2-methylTHF (2 mL) following the general procedure. The product was purified by flash chromatography (ether/pentane 10:90) to give **3** (151 mg, 55%) as a white solid. Mp = 66 °C. **<sup>1</sup>H NMR** (300 MHz, CDCl<sub>3</sub>): δ<sub>H</sub> 7.57 – 7.48 (m, 4H), 7.16 – 7.07 (m, 4H). **<sup>13</sup>C NMR** (75 MHz, CDCl<sub>3</sub>): δ<sub>C</sub> 163.64 (d, <sup>1</sup>J<sub>C-F</sub>=252 Hz, 2 C<sub>q</sub>-F), 151.47 (C=O), 136.22 (2 C<sub>q</sub>), 128.80 (d, <sup>3</sup>J<sub>C-F</sub> = 8.5 Hz, 4 CH), 121.69 (d, <sup>4</sup>J<sub>C-F</sub> = 3.5 Hz), 116.57 (d, <sup>2</sup>J<sub>C-F</sub> = 22.2 Hz). **<sup>19</sup>F NMR** (282 MHz, CDCl<sub>3</sub>): δ<sub>F</sub> -108.69 (s, 2 F<sub>Ar</sub>). **MS (HRMS):** C<sub>15</sub>H<sub>8</sub>F<sub>2</sub>NaO<sub>3</sub> [M+Na]<sup>+</sup> Meas. m/z = 297.0331 for 297.0334, C<sub>15</sub>H<sub>10</sub>F<sub>2</sub>NaO<sub>4</sub> [M+Na+H<sub>2</sub>O]<sup>+</sup> Meas. m/z = 315.0436 for 315.0439.

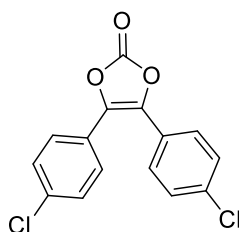

**4,5-Bis(4-chlorophenyl)-1,3-dioxol-2-one (4).** The title compound was synthesized from 4,4'-dichlorobenzoin (281 mg, 1 mmol), TBD (14 mg, 0.1 mmol, 10 mol%) and 2-methylTHF (2 mL) following the general procedure by following the general procedure. The product was purified by flash chromatography (ether/pentane 10:90) to give **4** (209 mg, 68%) as a white solid. Mp = 141 °C. **<sup>1</sup>H NMR** (300 MHz, CDCl<sub>3</sub>): δ<sub>H</sub> 7.51 – 7.45 (m, 4H), 7.43 – 7.38 (m, 4H). **<sup>13</sup>C NMR** (75 MHz, CDCl<sub>3</sub>): δ<sub>C</sub> 151.25 (C=O), 136.51 (2 C<sub>q</sub>), 129.63 (4 CH<sup>Ar</sup>), 127.89 (4 CH<sup>Ar</sup>), 123.86 (2 C<sub>q</sub>). **MS (HRMS):** C<sub>15</sub>H<sub>9</sub>Cl<sub>2</sub>O<sub>3</sub> [M+H]<sup>+</sup> Meas. m/z = 306.9924 for 306.9923, C<sub>15</sub>H<sub>8</sub>Cl<sub>2</sub>NaO<sub>3</sub> [M+Na]<sup>+</sup> Meas. m/z = 328.9742 for 328.9743, C<sub>15</sub>H<sub>10</sub>Cl<sub>2</sub>NaO<sub>4</sub> [M+Na+H<sub>2</sub>O]<sup>+</sup> Meas. m/z = 346.9849 for 346.9848.

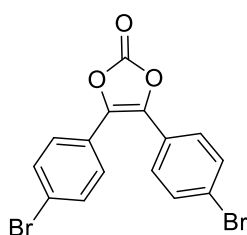

**4,5-Bis(4-bromophenyl)-1,3-dioxol-2-one (5).** The title compound was synthesized from 4,4'-dibromobenzoin (370 mg, 1 mmol), TBD (14 mg, 0.1 mmol, 10 mol%) and 2-methylTHF (2 mL) following the general procedure. The product was purified by flash chromatography (ether/pentane 10:90) to give **5** (329 mg, 83%) as a white solid. Mp = 152 °C. <sup>1</sup>H NMR (300 MHz, CDCl<sub>3</sub>): δ<sub>H</sub> 7.57 (d, *J* = 8.6 Hz, 4H), 7.42 (d, *J* = 8.6 Hz, 4H). <sup>13</sup>C NMR (75 MHz, CDCl<sub>3</sub>): δ<sub>C</sub> 151.21 (C=O), 136.63 (2 Cq), 132.59 (4 CH<sup>Ar</sup>), 128.04 (4 CH<sup>Ar</sup>), 124.78 (2 Cq), 124.32 (2 Cq). **MS (HRMS):** C<sub>15</sub>H<sub>8</sub>Br<sub>2</sub>NaO<sub>3</sub> [M+Na]<sup>+</sup> Meas. m/z = 416.8732 for 416.8732.

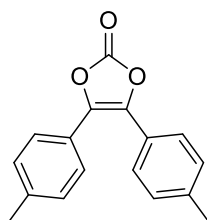

**4,5-Di-p-tolyl-1,3-dioxol-2-one (6).** The title compound was synthesized from 4,4'-dimethylbenzoin (240 mg, 1 mmol), TBD (14 mg, 0.1 mmol, 10 mol%) and 2-methylTHF (2 mL) following the general procedure. The product was purified by flash chromatography (ether/pentane 10:90) to give **6** (176 mg, 66%) as a white solid. Mp = 132 °C. <sup>1</sup>H NMR (300 MHz, CDCl<sub>3</sub>): δ<sub>H</sub> 7.47-7.42 (m, 4H), 7.23-7.18 (m, 4H), 2.39 (s, 6H). <sup>13</sup>C NMR (75 MHz, CDCl<sub>3</sub>): δ<sub>C</sub> 152.06 (C=O), 140.33 (2 Cq), 136.89 (2 Cq), 129.72 (4 CH<sup>Ar</sup>), 126.46 (4 CH<sup>Ar</sup>), 122.91 (2 Cq), 21.58 (2 CH<sub>3</sub>). **MS (HRMS):** C<sub>17</sub>H<sub>15</sub>O<sub>3</sub> [M+H]<sup>+</sup> Meas. m/z = 267.1013 for 267.1016, C<sub>17</sub>H<sub>14</sub>NaO<sub>3</sub> [M+Na]<sup>+</sup> Meas. m/z = 289.0833 for 289.0835, C<sub>34</sub>H<sub>28</sub>NaO<sub>6</sub> [2M+Na]<sup>+</sup> Meas. m/z = 555.1779 for 555.1778.

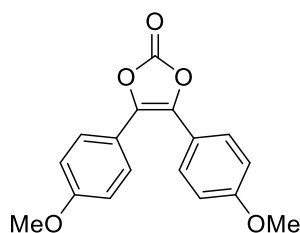

**4,5-Bis(4-methoxyphenyl)-1,3-dioxol-2-one (7):** The title compound was synthesized from 4,4'-dimethoxybenzoin (272 mg, 1 mmol), TBD (14 mg, 0.1 mmol, 10 mol%) and 2-methylTHF (2 mL) following the general procedure. The product was purified by flash chromatography (ether/pentane 10:90) to give **7** (194 mg, 65%) as a white solid. Mp = 143 °C. <sup>1</sup>H NMR (300 MHz, CDCl<sub>3</sub>): δ<sub>H</sub> = 7.47 (d, *J*=8.9 Hz, 4H<sup>Ar</sup>), 6.92 (d, *J*=8.9 Hz, 4H<sup>Ar</sup>), 3.84 (s, 6H, OCH<sub>3</sub>). <sup>13</sup>C NMR (75 MHz, CDCl<sub>3</sub>): δ<sub>C</sub> = 160.76 (2 OCq), 152.16 (C=O), 136.15 (2 Cq), 128.07 (4 CH), 118.15 (2 Cq), 114.52 (4 CH), 55.50 (2 OCH<sub>3</sub>). **MS (HRMS):** C<sub>17</sub>H<sub>15</sub>O<sub>5</sub> [M+H]<sup>+</sup> Meas. m/z = 299.0927 for 299.0914, C<sub>17</sub>H<sub>14</sub>NaO<sub>5</sub> [M+Na]<sup>+</sup> Meas. m/z = 321.0745 for 321.0733, C<sub>34</sub>H<sub>28</sub>NaO<sub>10</sub> [2M+Na]<sup>+</sup> Meas. m/z = 619.1592 for 619.1575.

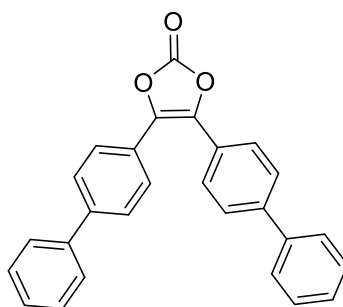

**4,5-Di([1,1'-biphenyl]-4-yl)-1,3-dioxol-2-one (8).** The title compound was prepared using 1,2-di([1,1'-biphenyl]-4-yl)-2-hydroxyethan-1-one, BPA-PC (508 mg, 2 mmol), TBD (14 mg, 0.1 mmol, 10 mol%) and 2-methylTHF (2 mL) following the general procedure. The product was purified by flash chromatography (ether/pentane 10:90) to give **8** (117 mg, 30%) as white powder. Mp= 85°C. **<sup>1</sup>H NMR** (300 MHz, CDCl<sub>3</sub>) δ<sub>H</sub> 7.73-7.59 (m, 12H, CH<sup>Ar</sup>), 7.52-7.37 (m, 6H, CH<sup>Ar</sup>). **<sup>13</sup>C NMR** (75 MHz, CDCl<sub>3</sub>) δ<sub>C</sub> 143.02 (C=O), 140.0 (4 Cq), 137.17 (2 Cq), 129.14 (4 CH), 128.20 (2 CH), 127.77 (4 CH), 127.20 (4 CH), 127.06 (4 CH), 124.56 (2 Cq). **MS (HRMS):** C<sub>27</sub>H<sub>19</sub>O<sub>3</sub> [M+H]<sup>+</sup> Meas. m/z = 391.1348 for 391.1329, C<sub>54</sub>H<sub>37</sub>O<sub>6</sub> [2M+H]<sup>+</sup> Meas. m/z = 781.2621 for 781.2585, C<sub>54</sub>H<sub>36</sub>NaO<sub>6</sub> [2M+Na]<sup>+</sup> Meas. m/z = 803.2442 for 803.2404.

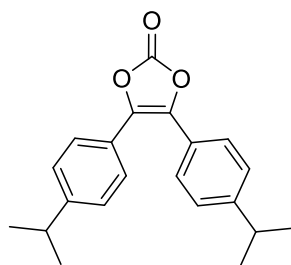

**4,5-Bis(4-isopropylphenyl)-1,3-dioxol-2-one (9).** The title compound was prepared using 2-hydroxy-1,2-bis(4-isopropylphenyl)ethan-1-one (296, 1 mmol), TBD (14 mg, 0.1 mmol, 10 mol%) and 2-methylTHF (2 mL) following the general procedure. The product was purified by flash chromatography (ether/pentane 10:90) to give **9** (225 mg, 70%) as colorless oil.  $^1\text{H NMR}$  (300 MHz,  $\text{CDCl}_3$ )  $\delta_{\text{H}}$  7.52–7.44 (m, 4H), 7.28–7.21 (m, 4H), 2.92 (hept,  $J = 6.9$  Hz, 2H), 1.25 (d,  $J = 6.9$  Hz, 12H).  $^{13}\text{C NMR}$  (75 MHz,  $\text{CDCl}_3$ )  $\delta_{\text{C}}$  151.19 (C=O), 136.98 (2 Cq), 130.33 (2 Cq), 127.15 (4  $\text{CH}^{\text{Ar}}$ ), 126.59 (4  $\text{CH}^{\text{Ar}}$ ), 123.29 (2 Cq), 34.23 (2 CH), 23.87 (4  $\text{CH}_3$ ). **MS (HRMS)**  $\text{C}_{21}\text{H}_{22}\text{NaO}_3$   $[\text{M}+\text{Na}]^+$  Meas.  $m/z = 345.1456$  for 345.1461,  $\text{C}_{42}\text{H}_{44}\text{NaO}_6$   $[2\text{M}+\text{Na}]^+$  Meas.  $m/z = 667.3027$  for 667.3030.

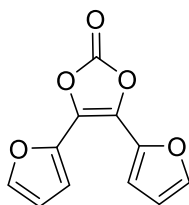

**4,5-Di(furan-2-yl)-1,3-dioxol-2-one (10).** The title compound was prepared using 1,2-di(furan-2-yl)-2-hydroxyethan-1-one (192 mg, 1 mmol), BPA-PC (508 mg, 2 mmol), TBD (14 mg, 0.1 mmol, 10 mol%) and 2-methylTHF (2 mL) following the general procedure. The product was purified by flash chromatography (ether/pentane 10:90) to give **10** (156 mg, 70%) as white powder. Mp = 140°C.  $^1\text{H NMR}$  (300 MHz,  $\text{CDCl}_3$ )  $\delta_{\text{H}}$  7.58 (dd,  $J = 1.8, 0.8$  Hz, 2H,  $\text{CH}^{\text{Ar}}$ ), 6.91 (dd,  $J = 3.5, 0.8$  Hz, 2H,  $\text{CH}^{\text{Ar}}$ ), 6.57 (dd,  $J = 3.5, 1.8$ , 2H,  $\text{CH}^{\text{AR}}$ ).  $^{13}\text{C NMR}$  (75 MHz,  $\text{CDCl}_3$ )  $\delta_{\text{C}}$  150.48 (C=O), 144.40 (2 CH), 140.05 (2 Cq), 128.98 (2 Cq), 112.06 (2 CH), 111.48 (2 CH). **MS (HRMS):**  $\text{C}_{11}\text{H}_7\text{O}_5$   $[\text{M}+\text{H}]^+$  Meas.  $m/z = 219.0288$  for 219.0288;  $\text{C}_{11}\text{H}_6\text{NaO}_5$   $[\text{M}+\text{Na}]^+$  Meas.  $m/z = 241.0107$  for 241.0107.

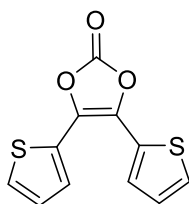

**4,5-Di(thiophen-2-yl)-1,3-dioxol-2-one (11).** The title compound was prepared using 2-hydroxy-1,2-di(thiophen-2-yl)ethan-1-one (224 mg, 1 mmol), BPA-PC (508 mg, 2 mmol), TBD (14 mg, 0.1 mmol, 10 mol%) and 2-methylTHF (2 mL) following the general procedure. The product was purified by flash chromatography (ether/pentane 10:90) to give **11** (138 mg, 55%) as a pink solid. Mp = 150°C.  $^1\text{H NMR}$  (300 MHz,  $\text{CDCl}_3$ )  $\delta_{\text{H}}$  7.49 (dd,  $J = 3.8, 1.3$  Hz, 2 $\text{H}^{\text{Ar}}$ ), 7.47 (dd,  $J = 5.2, 1.3$  Hz, 2 $\text{H}^{\text{Ar}}$ ), 7.14 (dd,  $J = 5.1, 3.7$  Hz, 2 $\text{H}^{\text{Ar}}$ ).  $^{13}\text{C NMR}$  (75 MHz,  $\text{CDCl}_3$ )  $\delta_{\text{C}}$  150.74 (C=O), 132.37 (2 Cq), 128.40 (2 CH), 128.31 (2 CH), 127.88 (2 CH), 125.72 (2 Cq). **MS (HRMS):**  $\text{C}_{11}\text{H}_7\text{O}_3\text{S}_2$   $[\text{M}+\text{H}]^+$  Meas.  $m/z = 250.9828$  for 250.983 ;  $\text{C}_{11}\text{H}_6\text{NaO}_3\text{S}_2$   $[\text{M}+\text{Na}]^+$  Meas.  $m/z = 272.9647$  for 272.9651.



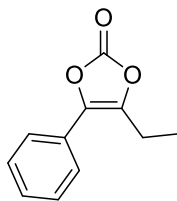

**4-Ethyl-5-phenyl-1,3-dioxol-2-one (13).** The title compound was prepared using 2-hydroxy-1-phenylbutan-1-one (164 mg, 1 mmol), BPA-PC (508 mg, 2 mmol), TBD (14 mg, 0.1 mmol, 10 mol%) and 2-methylTHF (2 mL) following the general procedure. The product was purified by flash chromatography (ether/pentane 10:90) to give **13** (124 mg, 65%) as a colorless oil. **<sup>1</sup>H NMR** (300 MHz, CDCl<sub>3</sub>) δ<sub>H</sub> 7.48-7.33 (m, 5H<sup>Ar</sup>), 2.73 (q, *J* = 7.5 Hz, 2H, CH<sub>2</sub>), 1.30 (t, *J* = 7.5 Hz, 3H, CH<sub>3</sub>). **<sup>13</sup>C NMR** (75 MHz, CDCl<sub>3</sub>) δ<sub>C</sub> 152.50 (C=O), 140.17 (C<sub>q</sub>), 136.89 (C<sub>q</sub>), 129.22 (CH), 129.11 (2 CH), 125.74 (C<sub>q</sub>), 125.39 (2 CH), 18.60 (CH<sub>2</sub>), 11.55 (CH<sub>3</sub>).

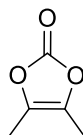

**4,5-Dimethyl-1,3-dioxol-2-one (14).** The title compound was prepared using 3-hydroxybutan-2-one (88 mg, 1 mmol), BPA-PC (508 mg, 2 mmol), TBD (14 mg, 0.1 mmol, 10 mol%) and 2-methylTHF (2 mL) following the general procedure. The product was purified by flash chromatography (ether/pentane 10:90) to give **14** (91 mg, 80%) as a white solid. Mp = 79-80 °C. **<sup>1</sup>H NMR** (300 MHz, CDCl<sub>3</sub>): δ<sub>H</sub> 2.02 (s, 6H, 2 CH<sub>3</sub>). **<sup>13</sup>C NMR** (75 MHz, CDCl<sub>3</sub>): δ<sub>C</sub> 153.27 (C=O), 134.85 (2 C<sub>q</sub>), 9.04 (2 CH<sub>3</sub>).

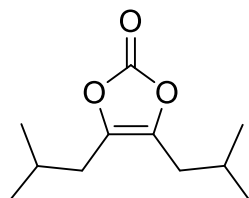

**4,5-Diisobutyl-1,3-dioxol-2-one (15).** The title compound was prepared using 5-hydroxy-2,7-dimethyloctan-4-one (172 mg, 1 mmol), BPA-PC (508 mg, 2 mmol), TBD (14 mg, 0.1 mmol, 10 mol%) and 2-methylTHF (2 mL) following the general procedure. The product was purified by flash chromatography (ether/pentane 10:90) to give **15** (149 mg, 75%) as a colorless oil. **<sup>1</sup>H NMR** (300 MHz, CDCl<sub>3</sub>): δ<sub>H</sub> 2.20 (d, *J* = 7.0 Hz, 4H, 2 CH<sub>2</sub>), 1.93 (thept, *J* = 6.5, 6.8 Hz, 2H, 2 CH), 0.94 (d, *J* = 6.7 Hz, 12H, 4 CH<sub>3</sub>). **<sup>13</sup>C NMR** (75 MHz, CDCl<sub>3</sub>): δ<sub>C</sub> 153.51 (C=O), 138.63 (2 C<sub>q</sub>), 32.52 (2 CH), 26.74 (2 CH<sub>2</sub>), 22.23 (4 CH<sub>3</sub>). **MS (HRMS):** C<sub>11</sub>H<sub>18</sub>NaO<sub>3</sub> [M+Na]<sup>+</sup> Meas. m/z = 221.1142 for 221.1148, C<sub>22</sub>H<sub>36</sub>NaO<sub>6</sub> [2M+Na]<sup>+</sup> Meas. m/z = 419.2392 for 419.2404.

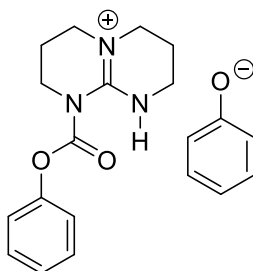

**Diphenylcarbonate / TBD 1:1 adduct.** The title compound was obtained by mixing 0.5 mL of a 0.2 M solution of diphenyl carbonate in  $d_6$ -DMSO with 0.5 mL of a 0.2 M solution of TBD in  $d_6$ -DMSO. The resulting solution was stirred at room temperature and a portion was transferred to an NMR tube.  **$^1\text{H}$  NMR** (300 MHz,  $d_6$ -DMSO)  $\delta_{\text{H}}$  9.52 (br s, 1H, NH), 7.26-7.18 (m, 1H), 7.17-7.07 (m, 5H), 6.79-6.67 (m, 4H), 3.62 (t,  $J = 6.4$ , 2H), 3.31 (t,  $J = 5.7$ , 2H), 3.18 (t,  $J = 5.8$ , 2H), 3.13 (t,  $J = 6.2$ , 2H), 1.92 (p,  $J = 6.3$ , 2H), 1.75 (p,  $J = 5.8$ , 2H).  **$^{13}\text{C}$  NMR** (75 MHz,  $d_6$ -DMSO)  $\delta_{\text{C}}$  157.77 (Cq), 152.76 (Cq), 151.27 (Cq), 145.79 (Cq), 129.27 (2  $\text{CH}^{\text{Ar}}$  +  $\text{CH}^{\text{Ar}}$ ), 125.20 ( $\text{CH}^{\text{Ar}}$ ), 121.60 (2  $\text{CH}^{\text{Ar}}$ ), 118.38 (2  $\text{CH}^{\text{Ar}}$ ), 115.32 (2  $\text{CH}^{\text{Ar}}$ ), 47.87 (N- $\text{CH}_2$ ), 47.44 (N- $\text{CH}_2$ ), 43.71 (N- $\text{CH}_2$ ), 43.21 (N- $\text{CH}_2$ ), 23.42 ( $\text{CH}_2$ ), 21.54 ( $\text{CH}_2$ ).

## 7. NMR spectra of vinylene carbonates

**<sup>1</sup>H NMR (300 MHz, CDCl<sub>3</sub>) of 4,5-diphenyl-1,3-dioxol-2-one (2).**

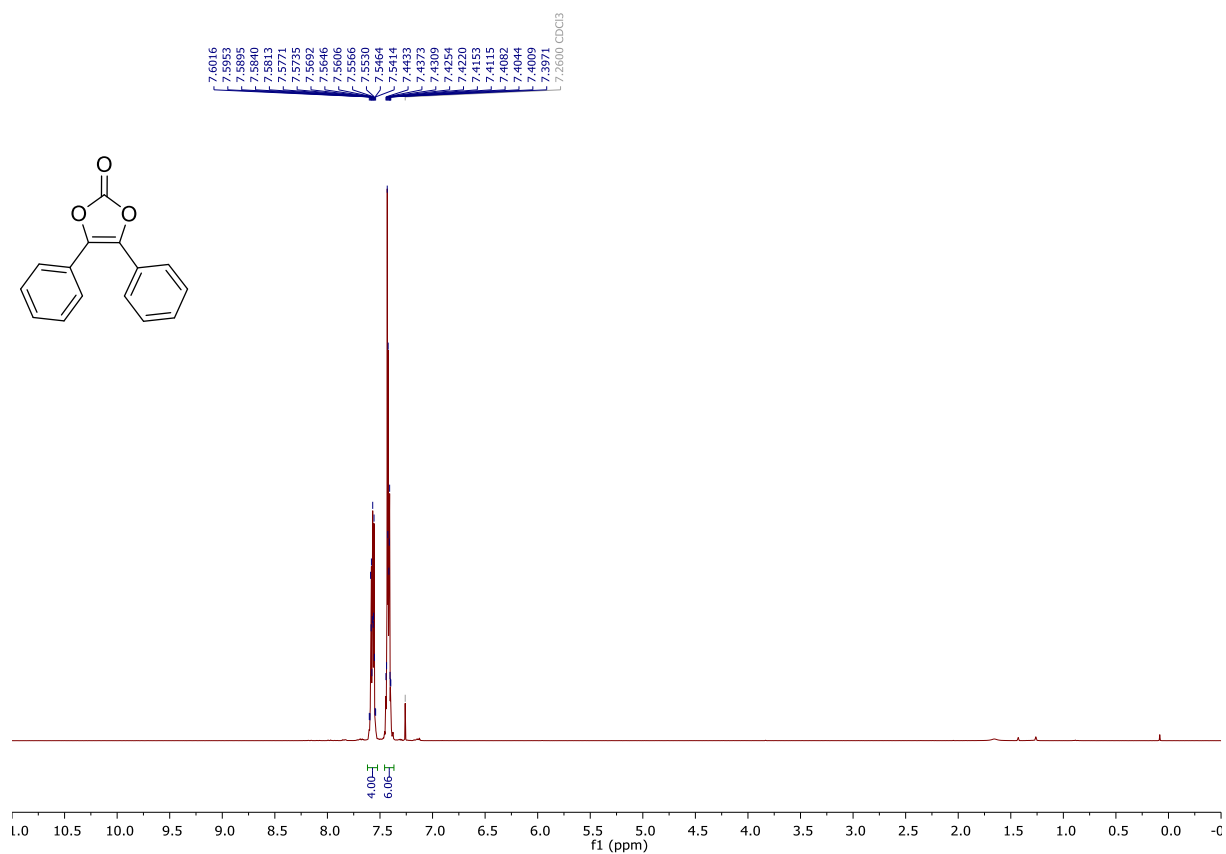

**<sup>13</sup>C-NMR (75 MHz, CDCl<sub>3</sub>) of 4,5-diphenyl-1,3-dioxol-2-one (2).**

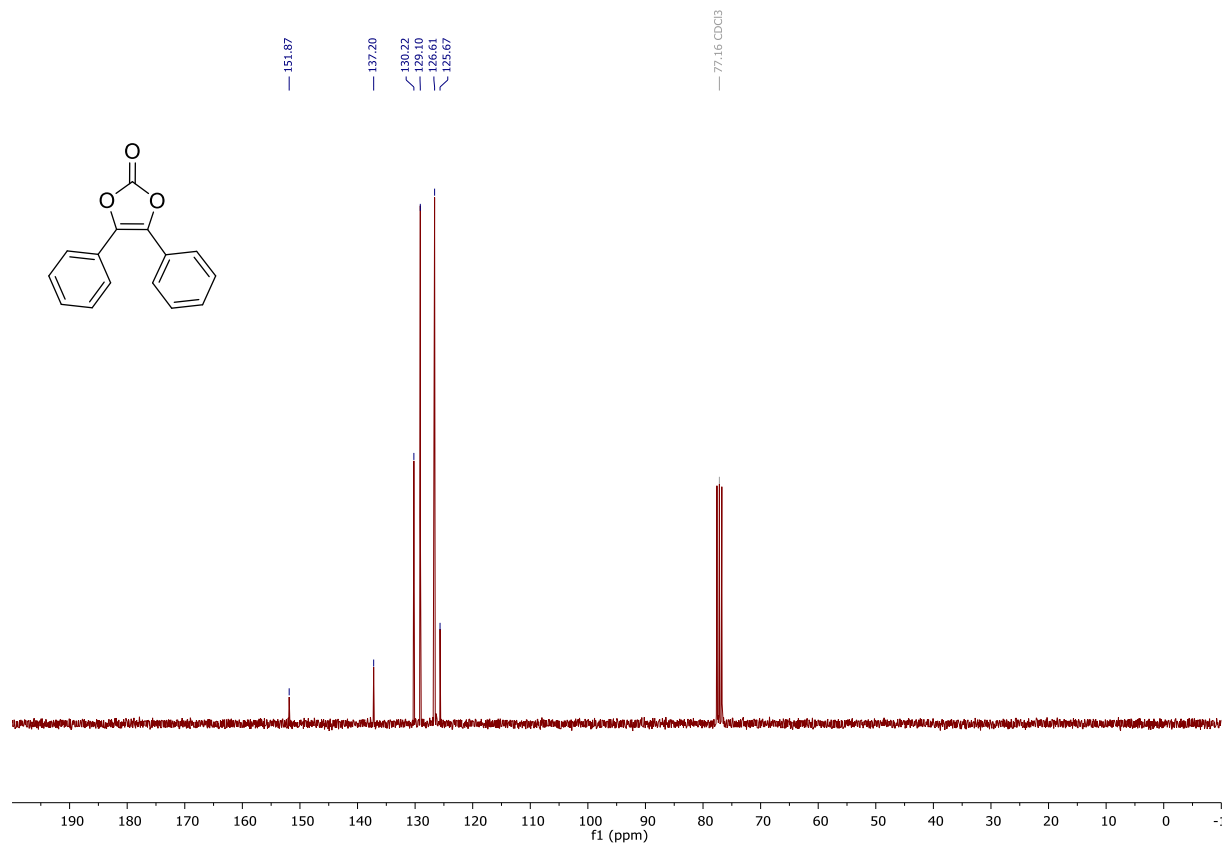

<sup>1</sup>H NMR (300 MHz, CDCl<sub>3</sub>) of 4,5-bis(4-fluorophenyl)-1,3-dioxol-2-one (3).

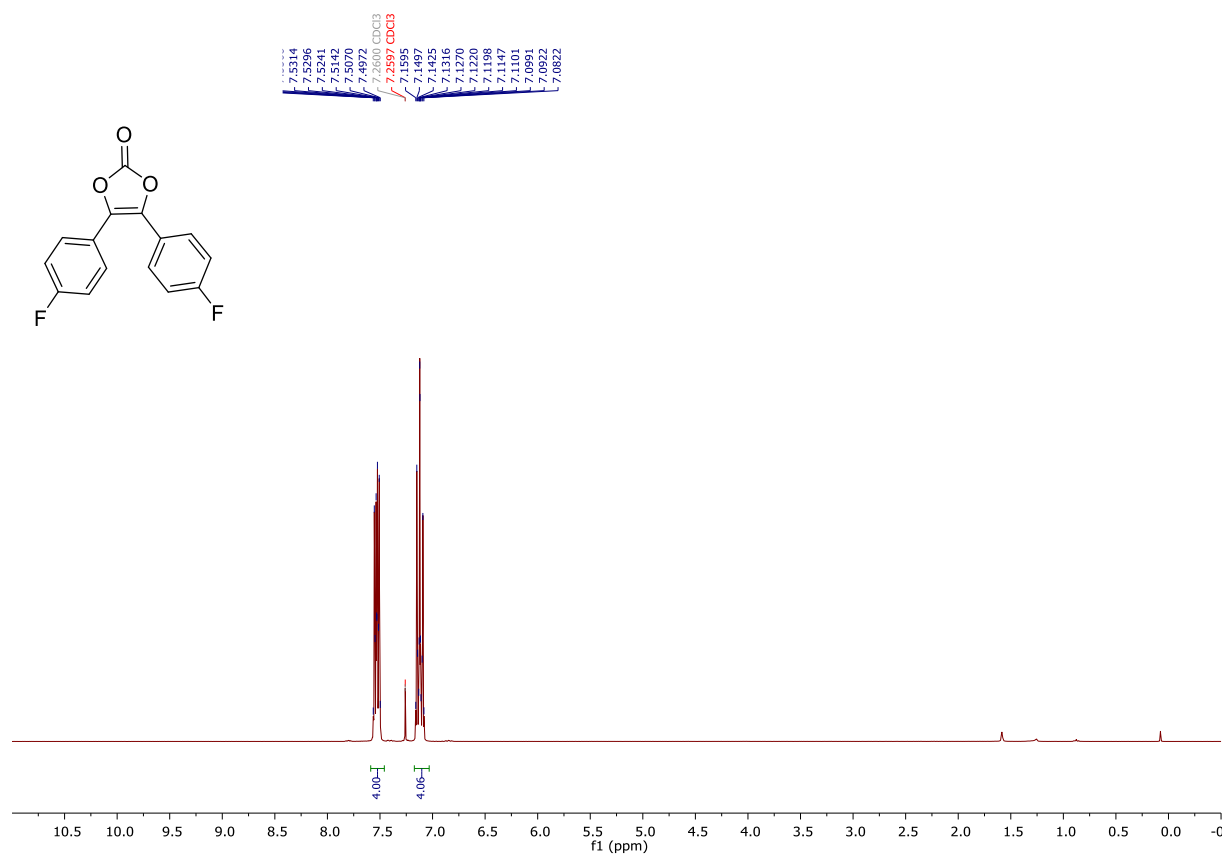

<sup>13</sup>C-NMR (75 MHz, CDCl<sub>3</sub>) of 4,5-bis(4-fluorophenyl)-1,3-dioxol-2-one (3).

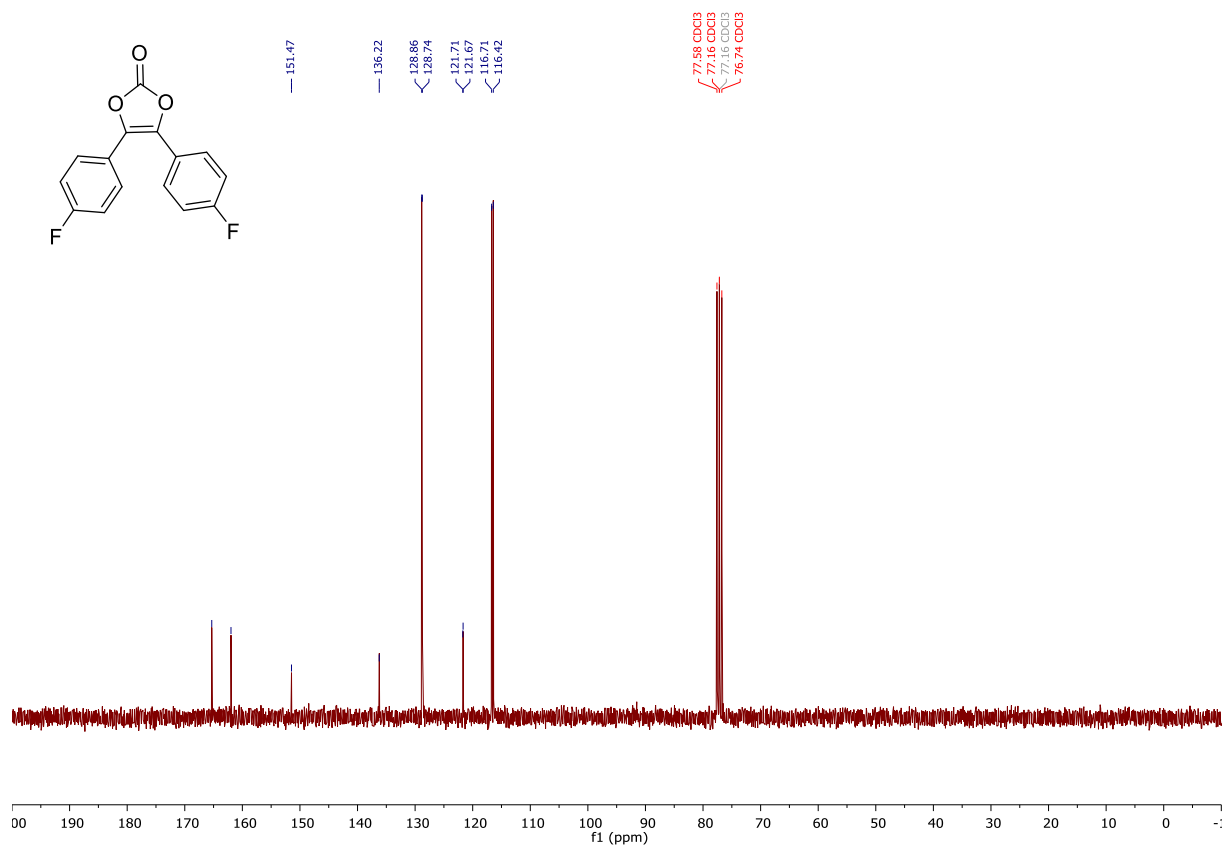

<sup>19</sup>F NMR (282 MHz, CDCl<sub>3</sub>) of 4,5-bis(4-fluorophenyl)-1,3-dioxol-2-one (**3**).

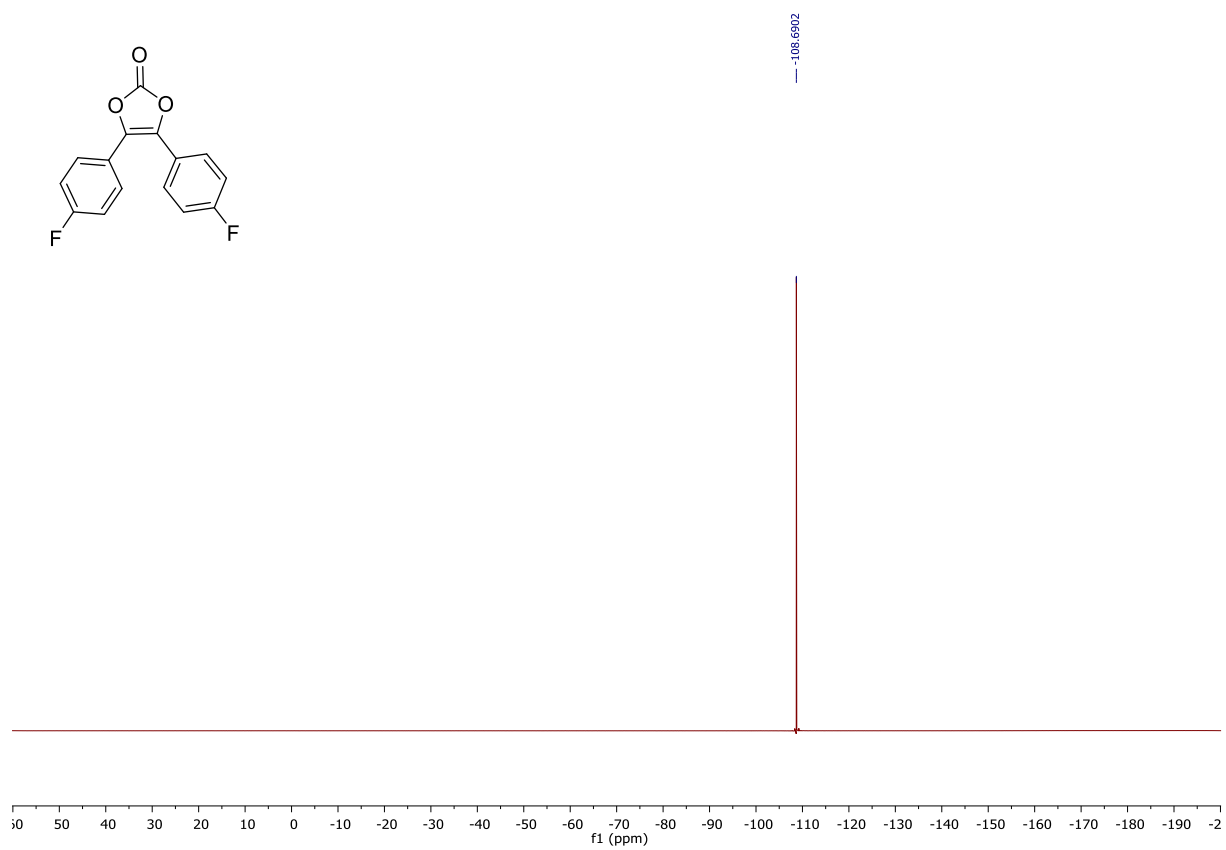

**<sup>1</sup>H NMR (300 MHz, CDCl<sub>3</sub>) of 4,5-bis(4-chlorophenyl)-1,3-dioxol-2-one (4)**

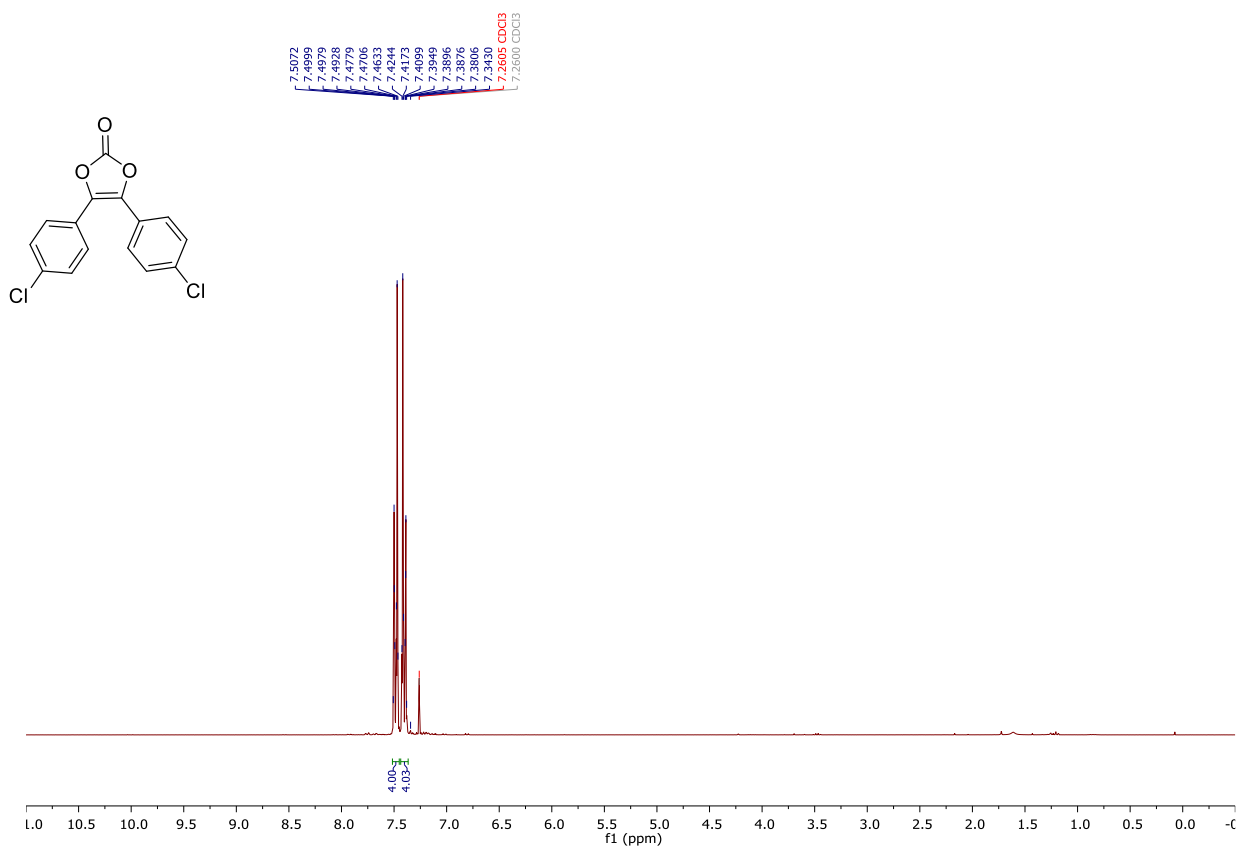

**<sup>13</sup>C-NMR (75 MHz, CDCl<sub>3</sub>) of 4,5-bis(4-chlorophenyl)-1,3-dioxol-2-one (4)**

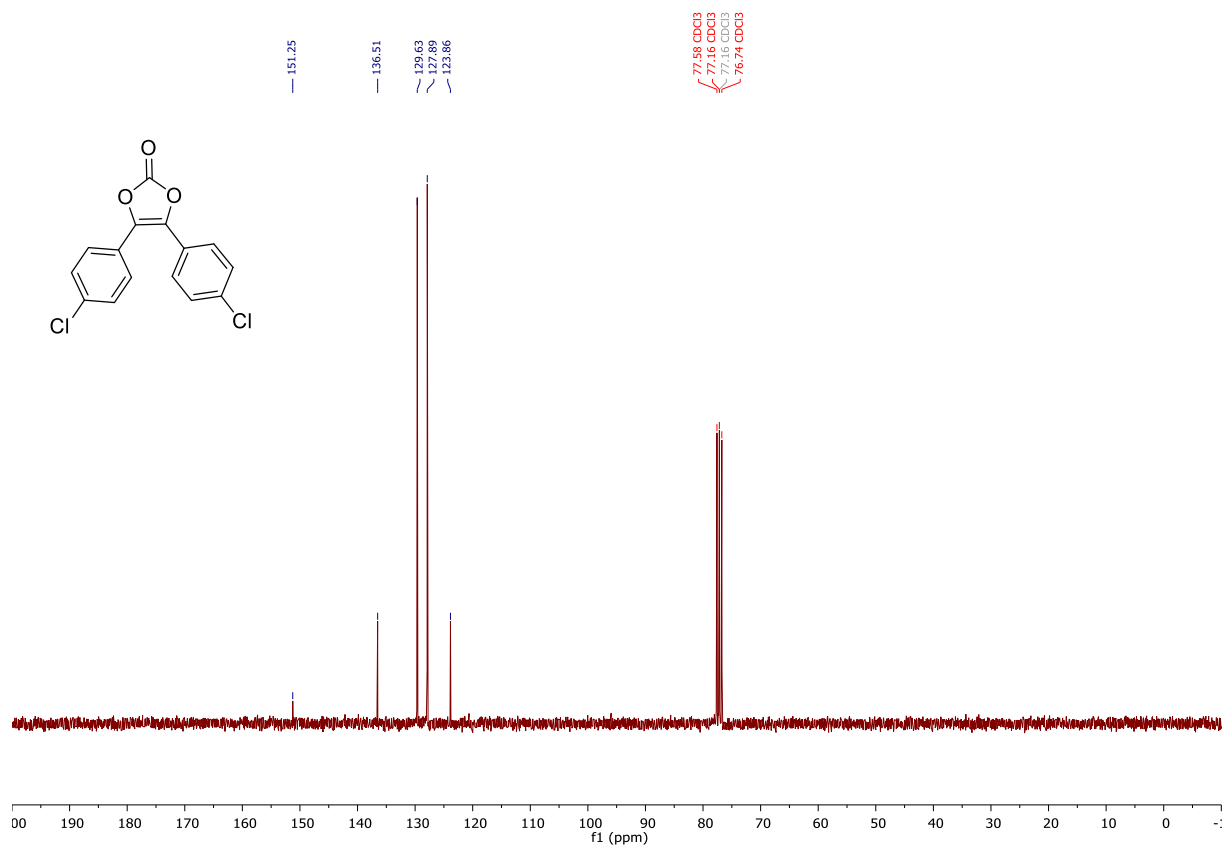

**<sup>1</sup>H NMR (300 MHz, CDCl<sub>3</sub>) of 4,5-bis(4-bromophenyl)-1,3-dioxol-2-one (5).**

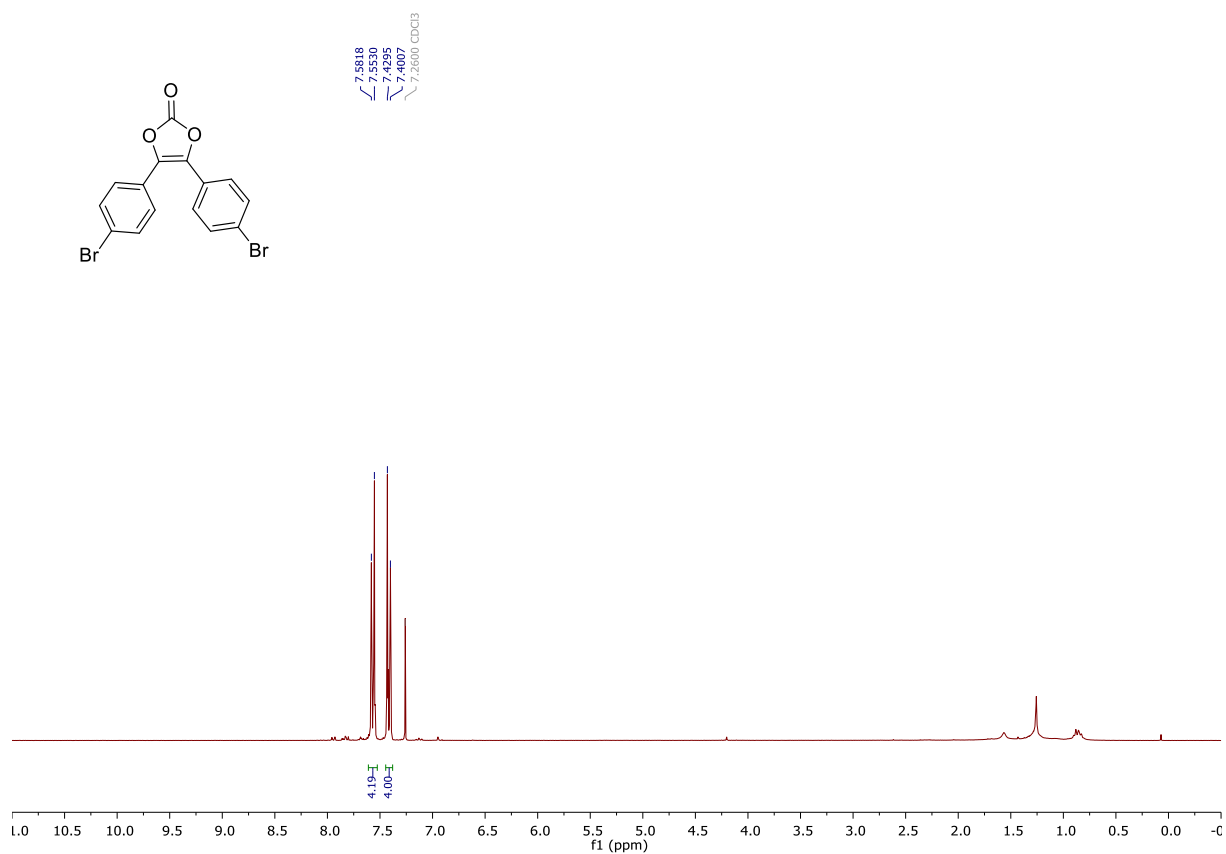

**<sup>13</sup>C-NMR (75 MHz, CDCl<sub>3</sub>) of 4,5-bis(4-bromophenyl)-1,3-dioxol-2-one (5).**

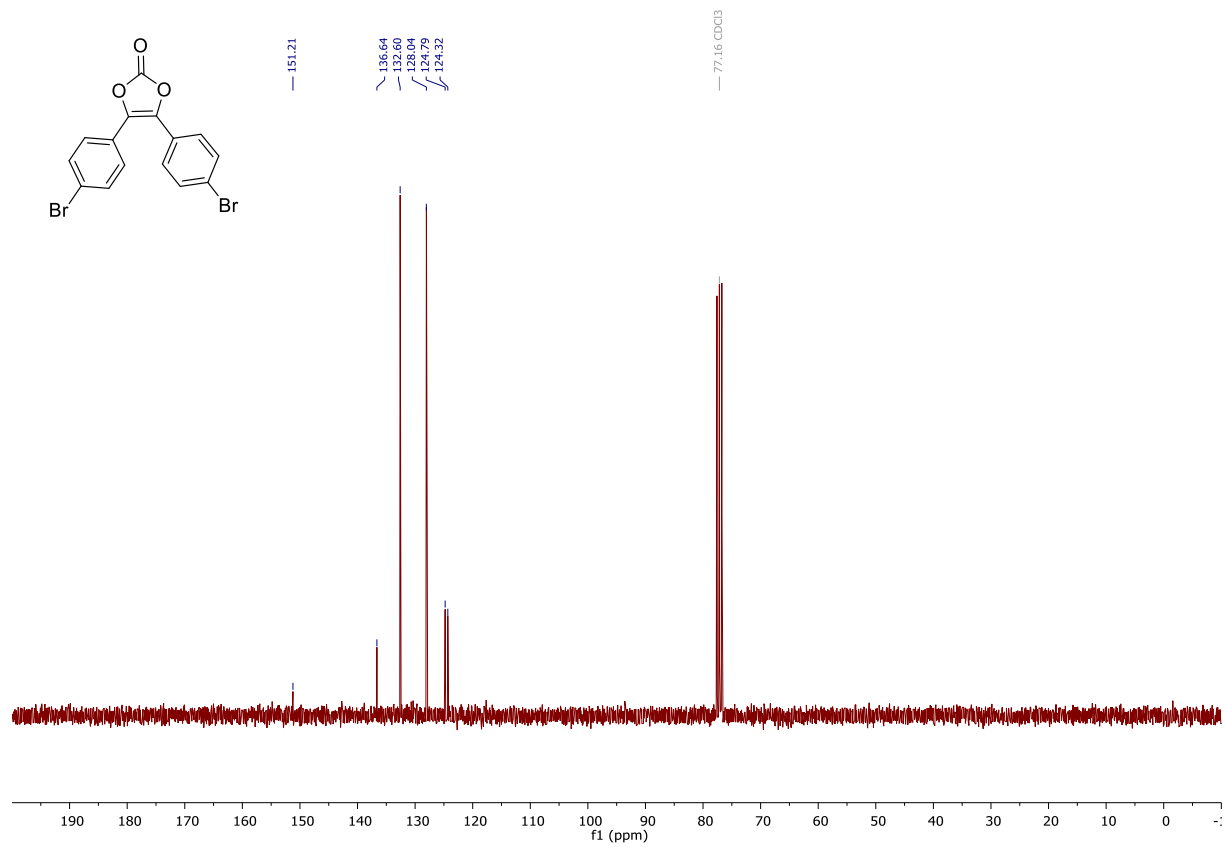

**<sup>1</sup>H NMR (300 MHz, CDCl<sub>3</sub>) of 4,5-di-p-tolyl-1,3-dioxol-2-one (6).**

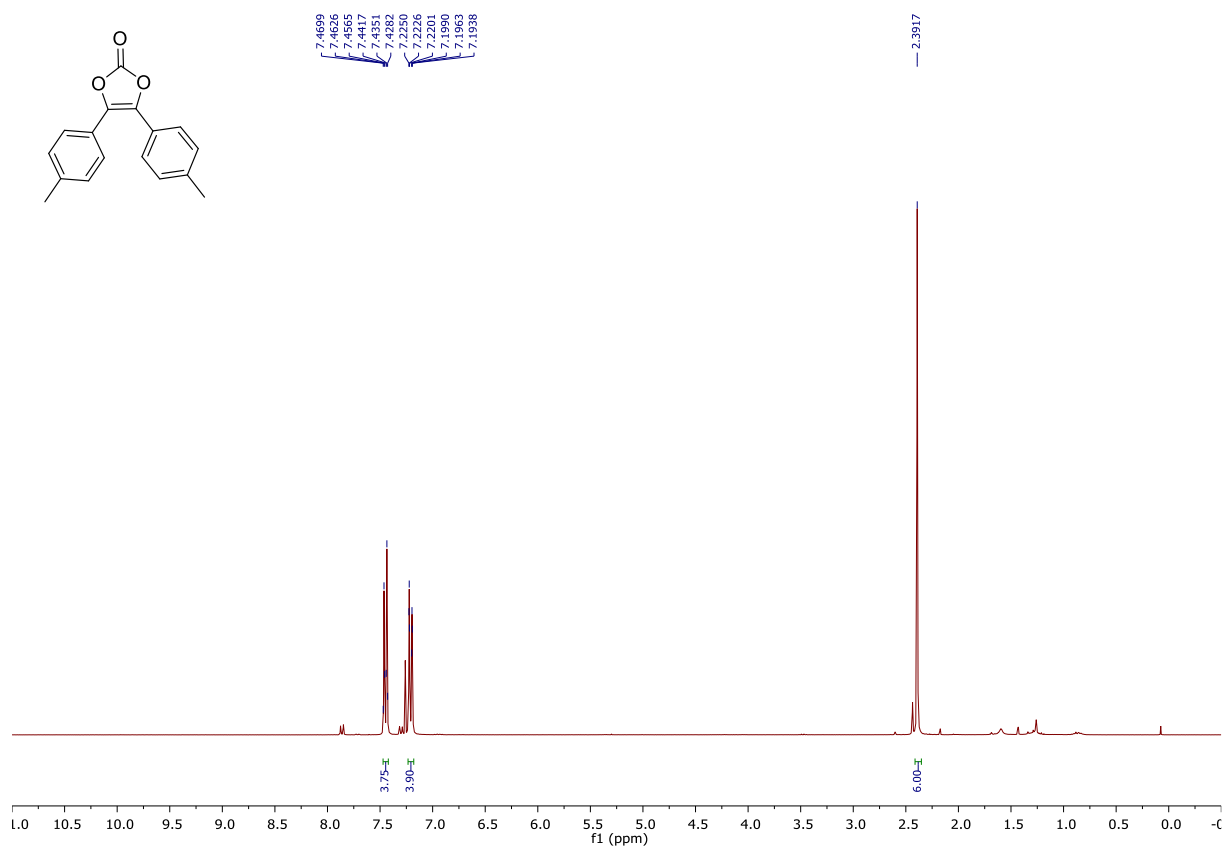

**<sup>13</sup>C-NMR (75 MHz, CDCl<sub>3</sub>) of 4,5-di-p-tolyl-1,3-dioxol-2-one (6).**

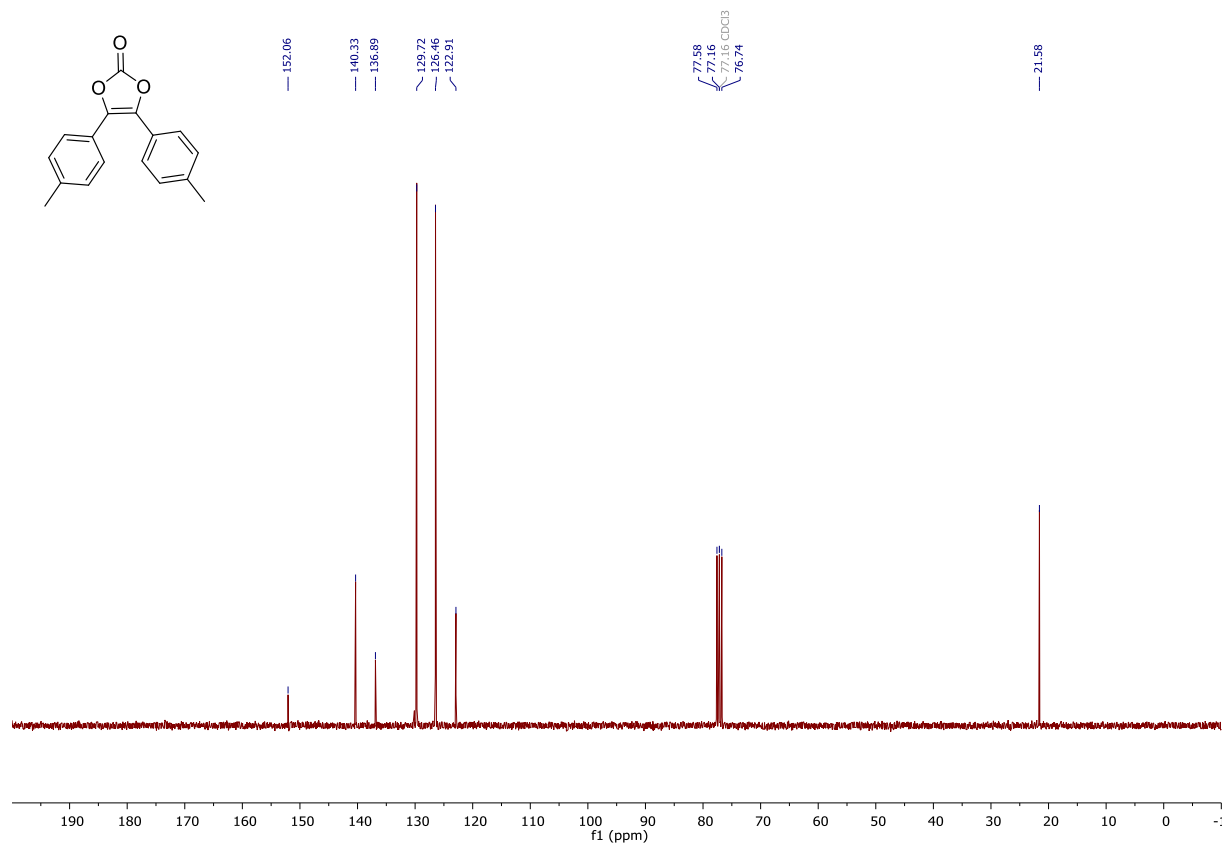



**<sup>1</sup>H NMR (300 MHz, CDCl<sub>3</sub>) of 4,5-bis(4-methoxyphenyl)-1,3-dioxol-2-one (7).**

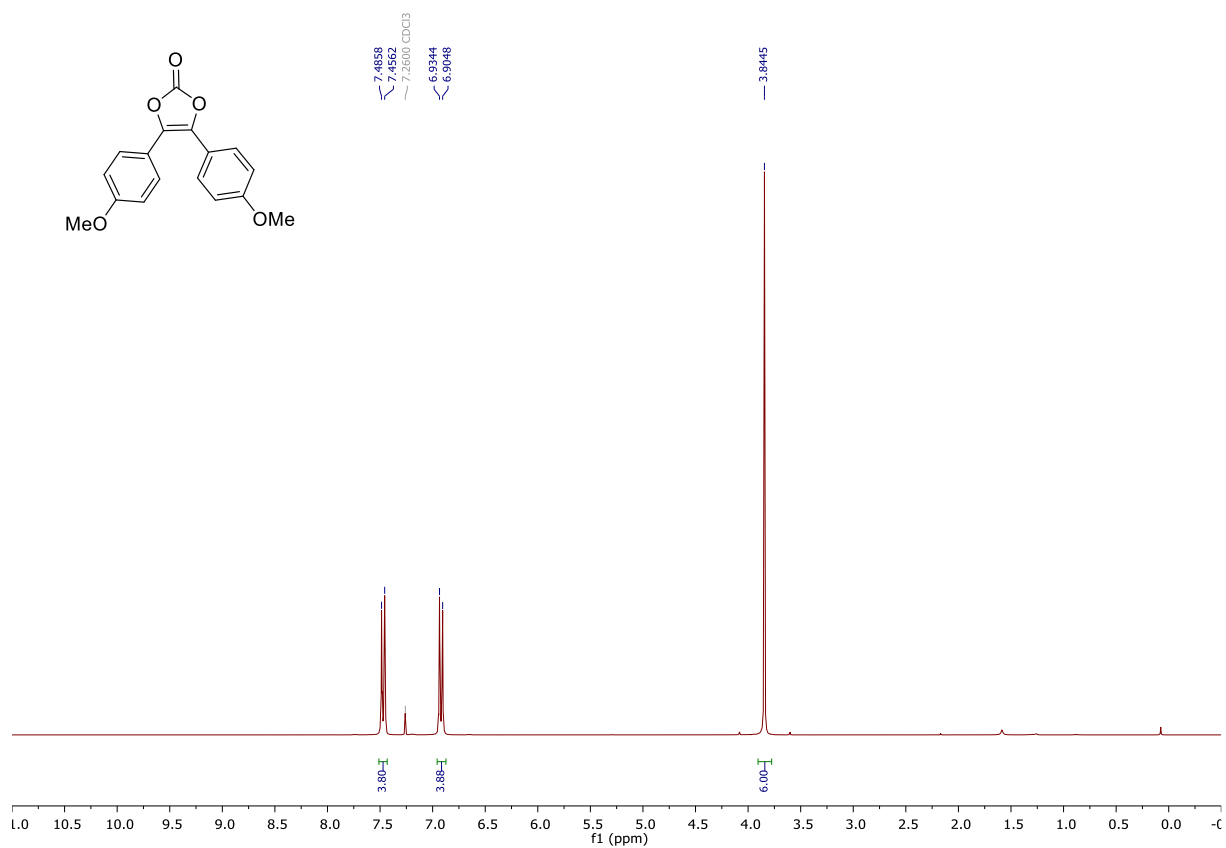

**<sup>13</sup>C-NMR (75 MHz, CDCl<sub>3</sub>) of 4,5-bis(4-methoxyphenyl)-1,3-dioxol-2-one (7).**

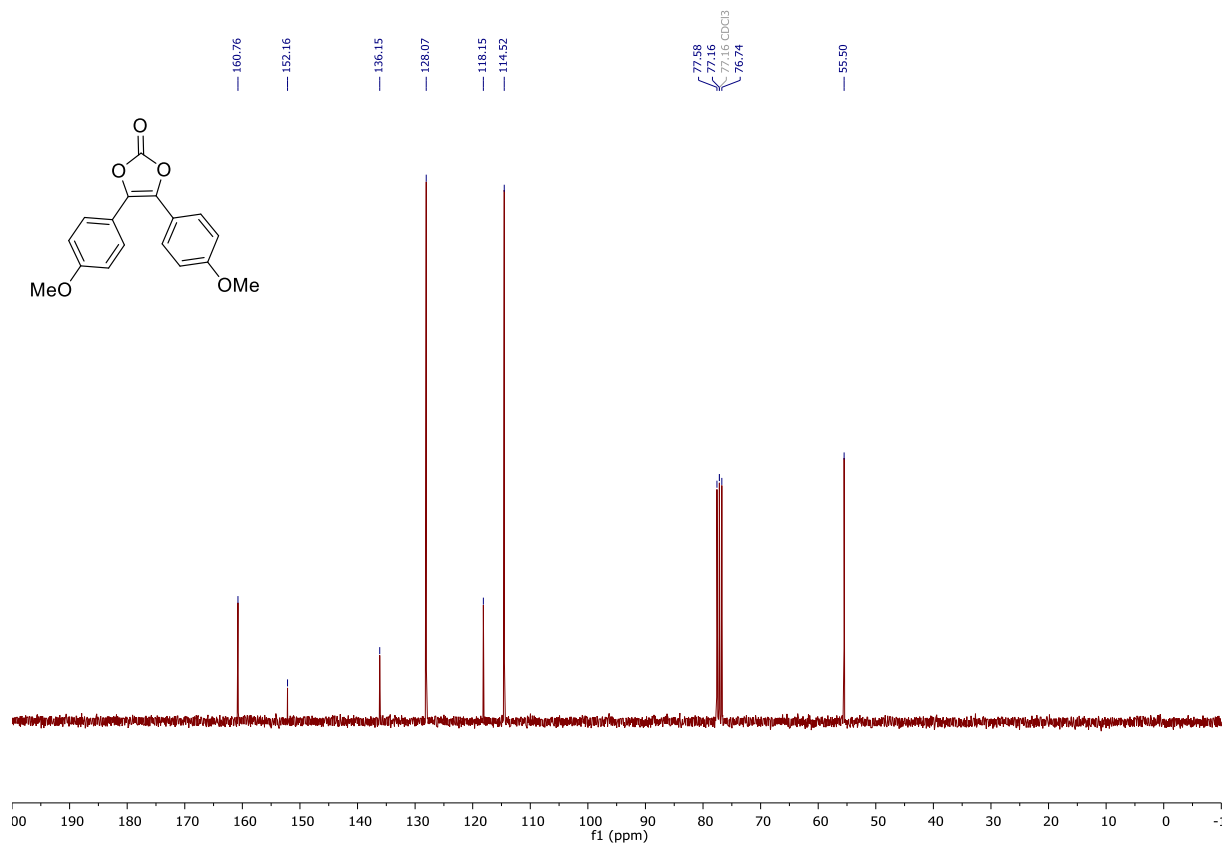

<sup>1</sup>H NMR (300 MHz, CDCl<sub>3</sub>) of 4,5-Di([1,1'-biphenyl]-4-yl)-1,3-dioxol-2-one (**8**).

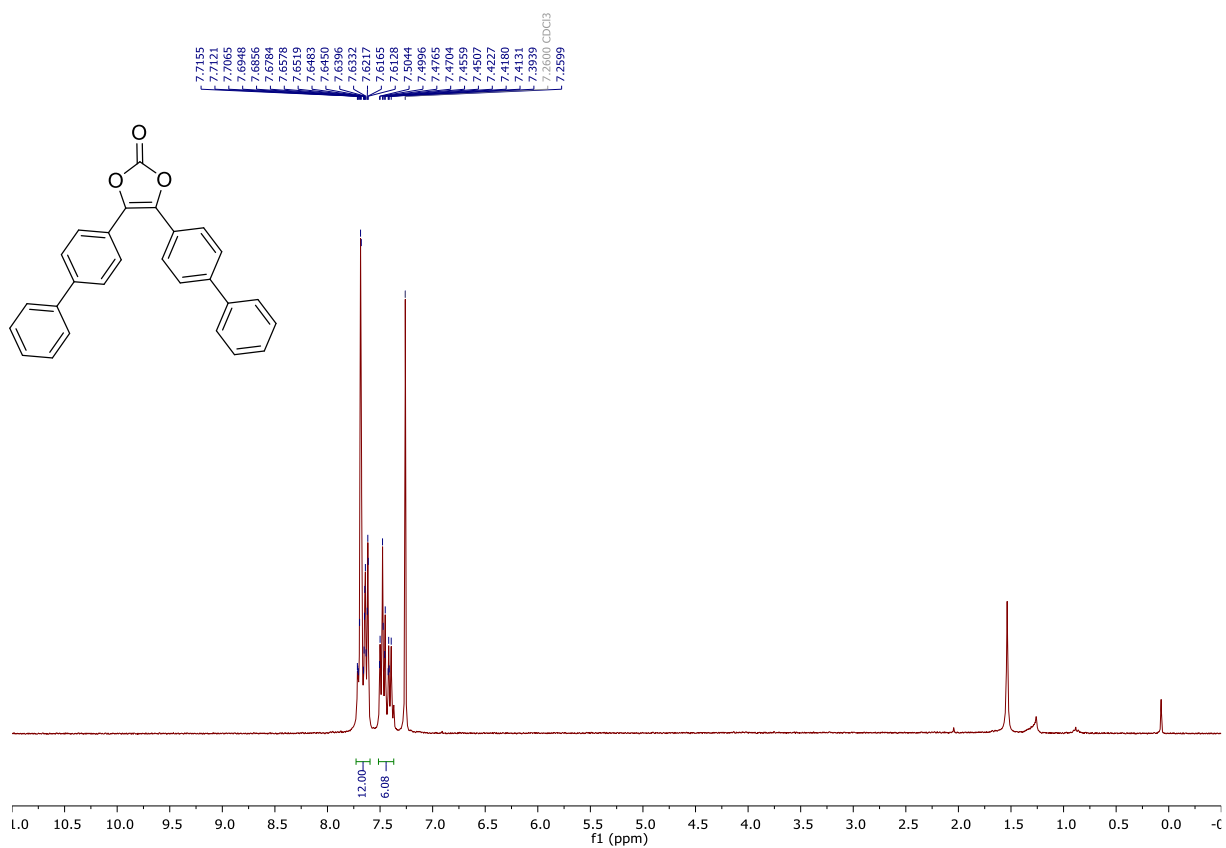

<sup>13</sup>C-NMR (75 MHz, CDCl<sub>3</sub>) of 4,5-Di([1,1'-biphenyl]-4-yl)-1,3-dioxol-2-one (**8**).

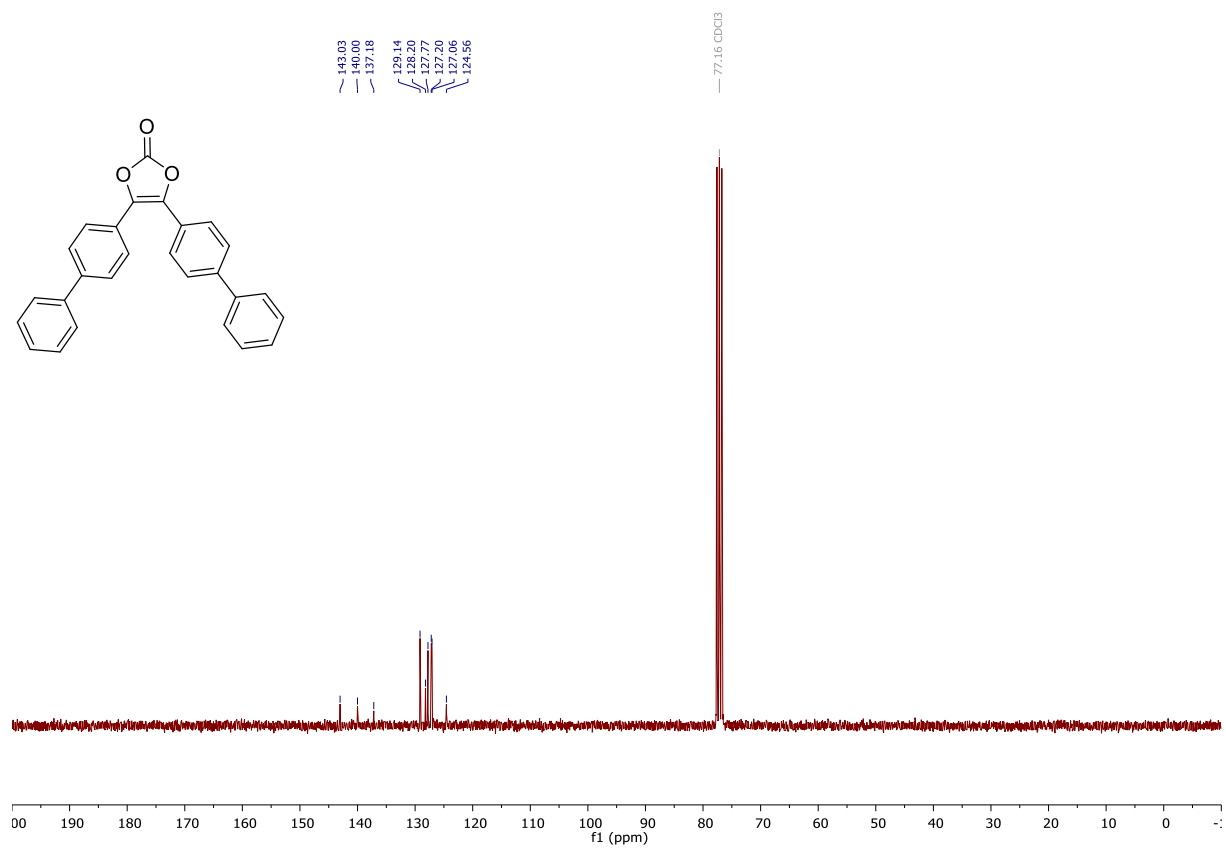

**<sup>1</sup>H NMR (300 MHz, CDCl<sub>3</sub>) of 4,5-bis(4-isopropylphenyl)-1,3-dioxol-2-one (9).**

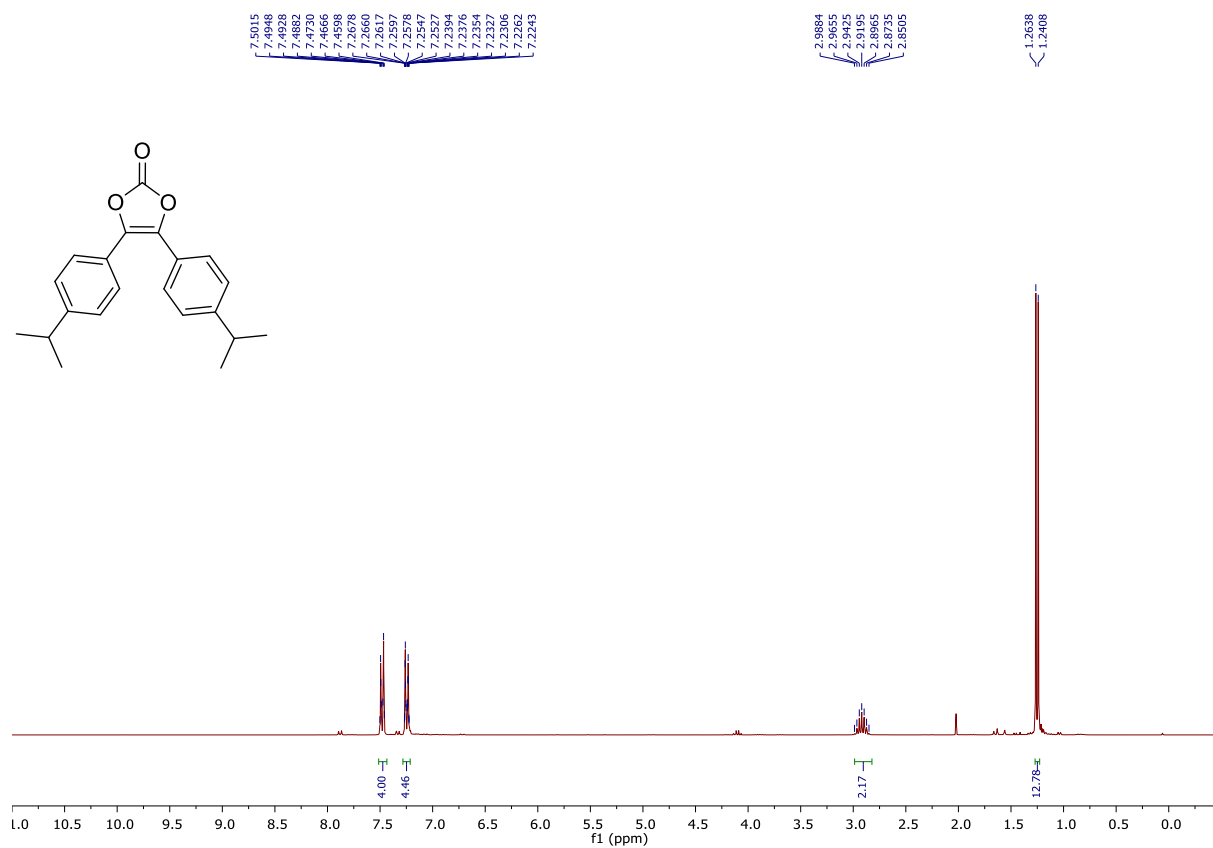

**<sup>13</sup>C-NMR (75 MHz, CDCl<sub>3</sub>) of 4,5-bis(4-isopropylphenyl)-1,3-dioxol-2-one (9).**

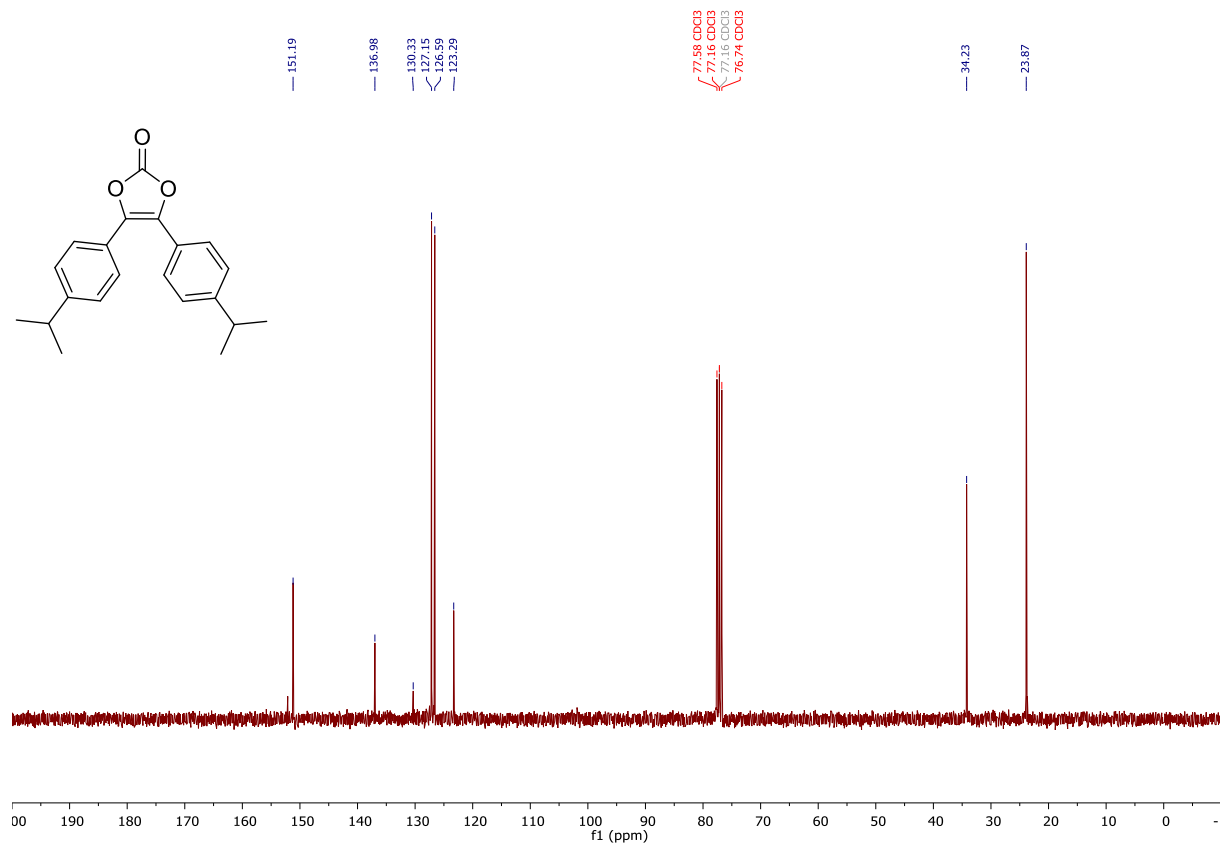

<sup>1</sup>H NMR (300 MHz, CDCl<sub>3</sub>) of 4,5-Di(furan-2-yl)-1,3-dioxol-2-one (**10**).

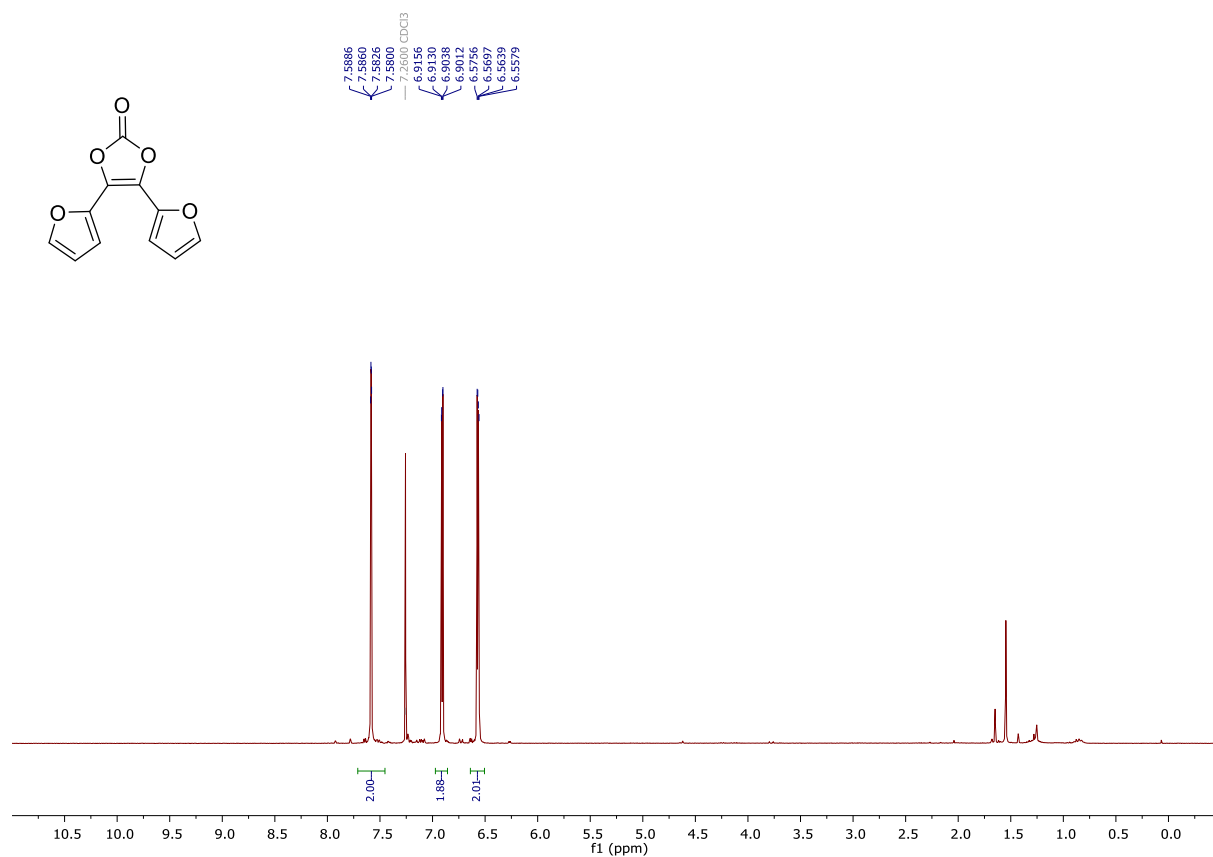

<sup>13</sup>C-NMR (75 MHz, CDCl<sub>3</sub>) of 4,5-Di(furan-2-yl)-1,3-dioxol-2-one (**10**).

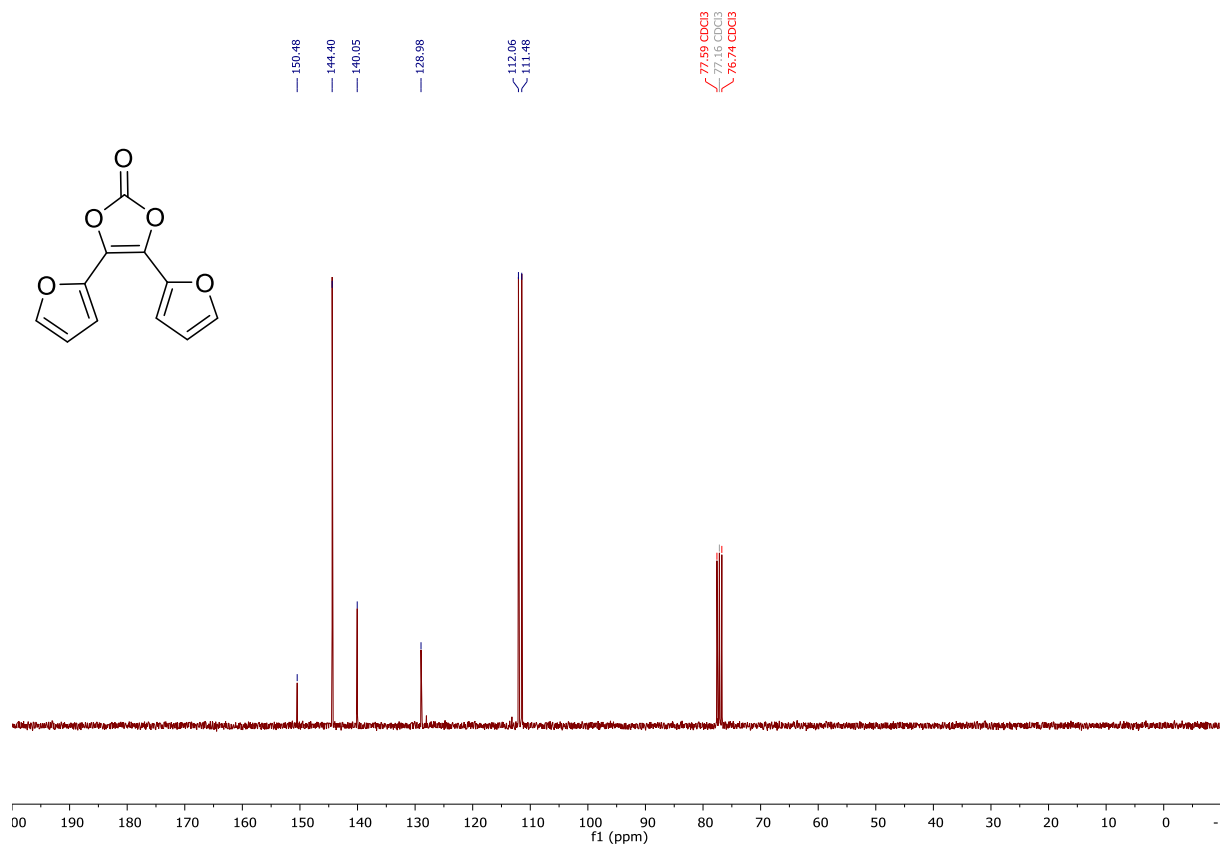

**<sup>1</sup>H NMR (300 MHz, CDCl<sub>3</sub>) of 4,5-Di(thiophen-2-yl)-1,3-dioxol-2-one (11).**

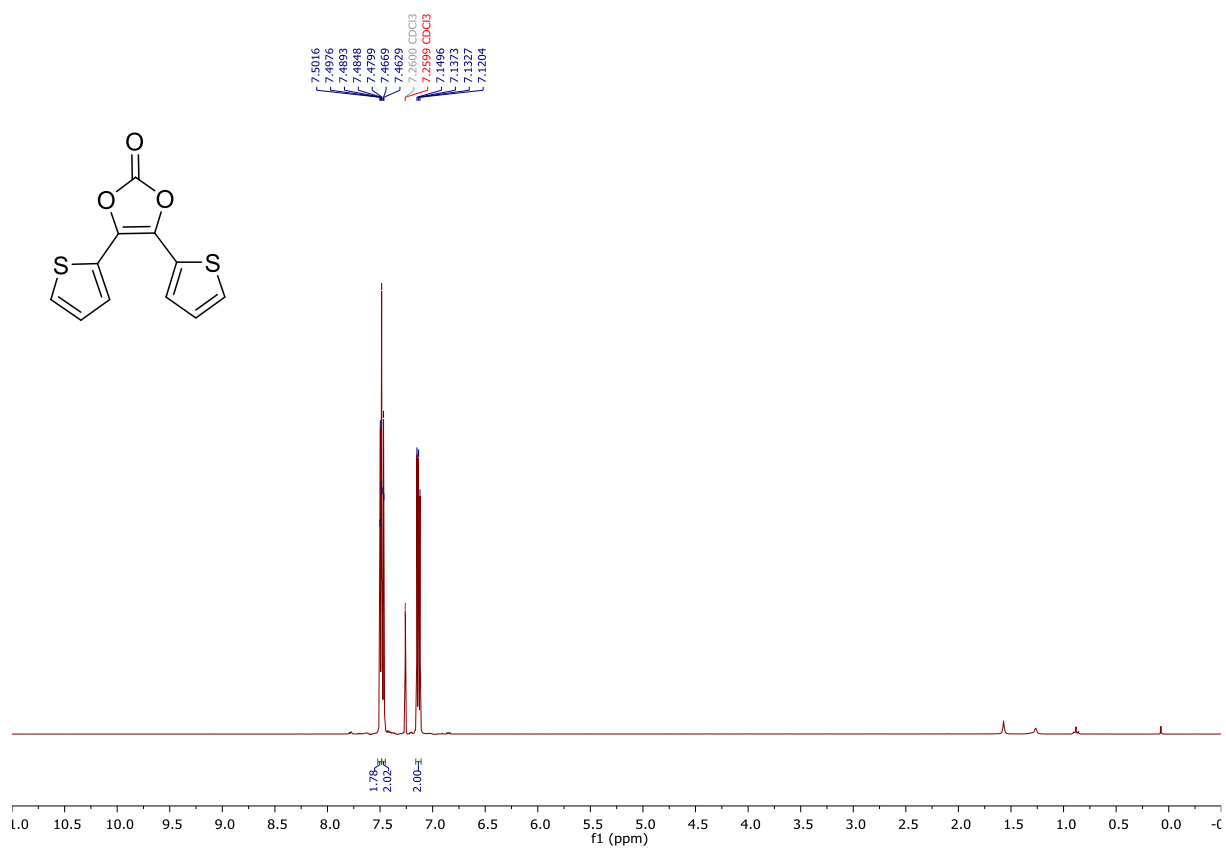

**<sup>13</sup>C-NMR (75 MHz, CDCl<sub>3</sub>) of 4,5-di(thiophen-2-yl)-1,3-dioxol-2-one (11).**

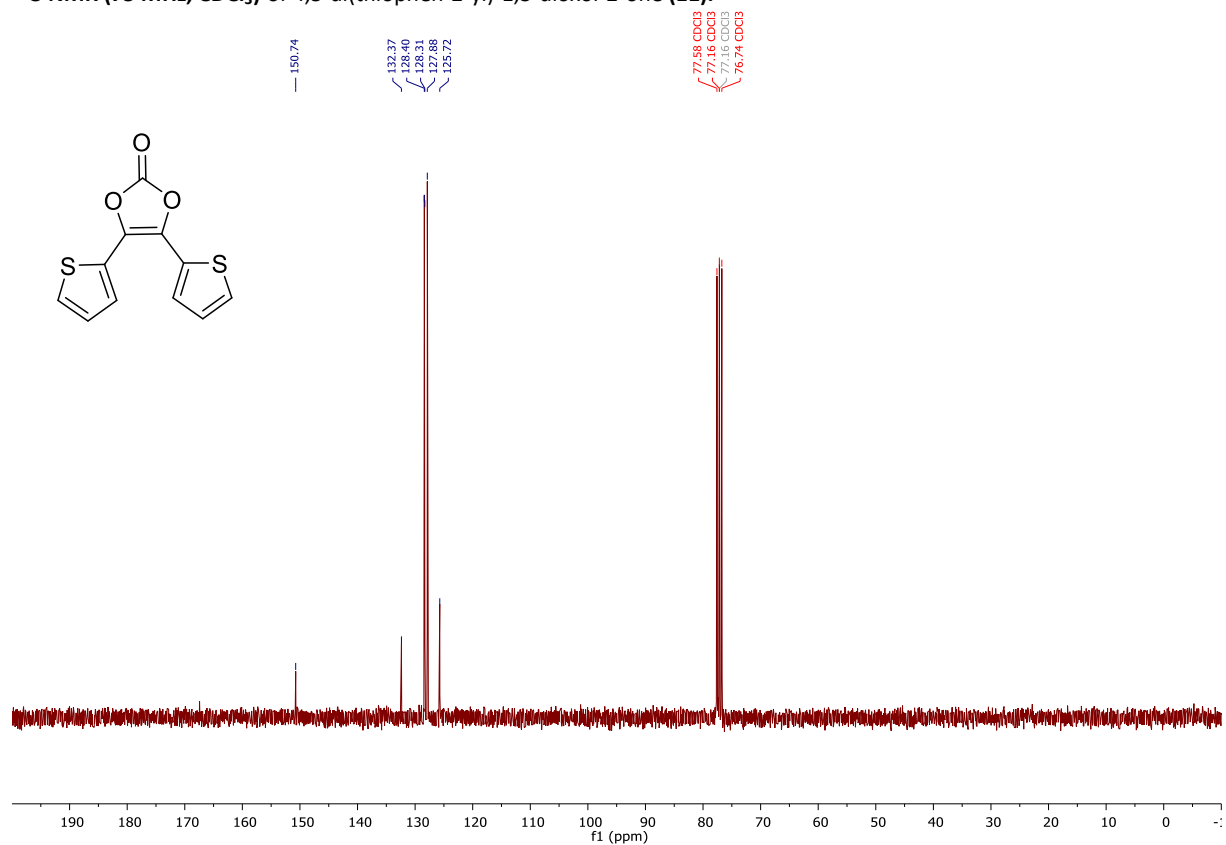

**<sup>1</sup>H NMR (300 MHz, CDCl<sub>3</sub>) of 4-ethyl-5-phenyl-1,3-dioxol-2-one (13).**

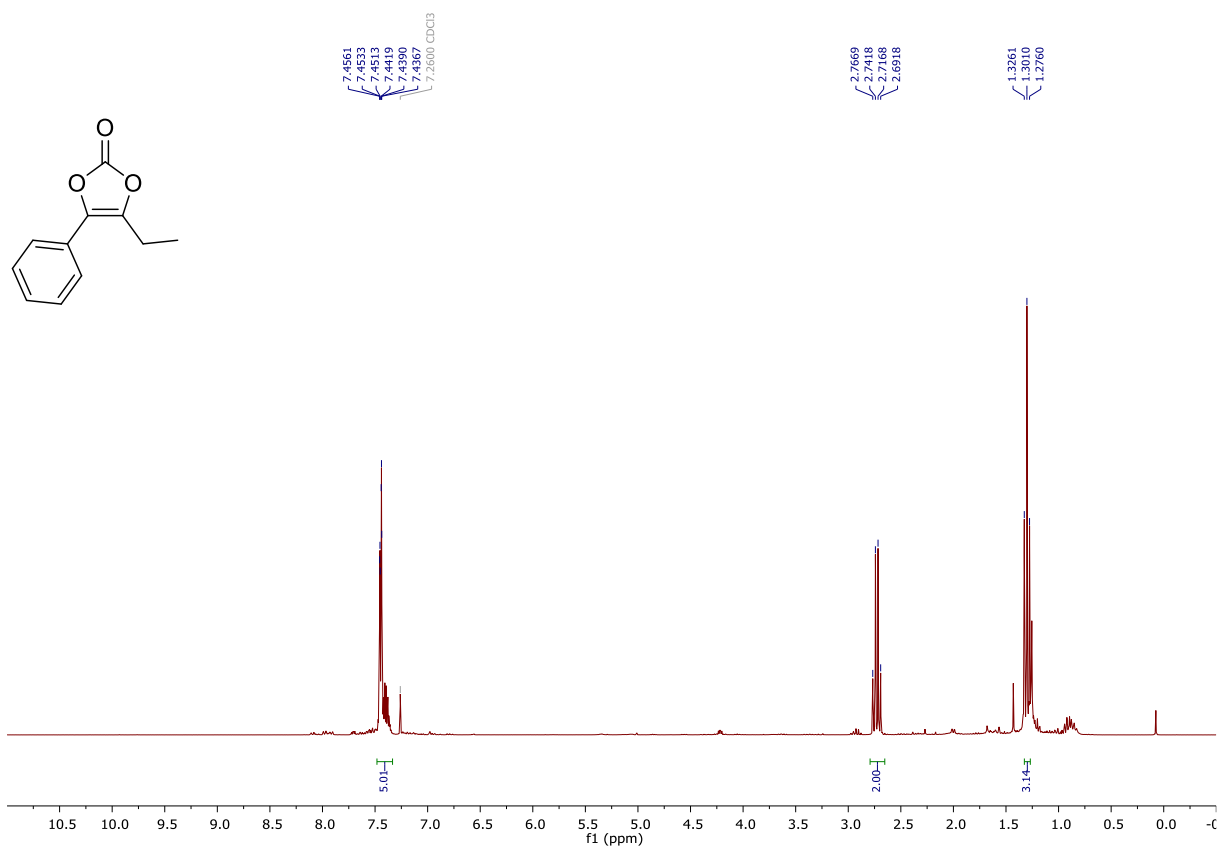

**<sup>13</sup>C-NMR (75 MHz, CDCl<sub>3</sub>) of 4-ethyl-5-phenyl-1,3-dioxol-2-one (13).**

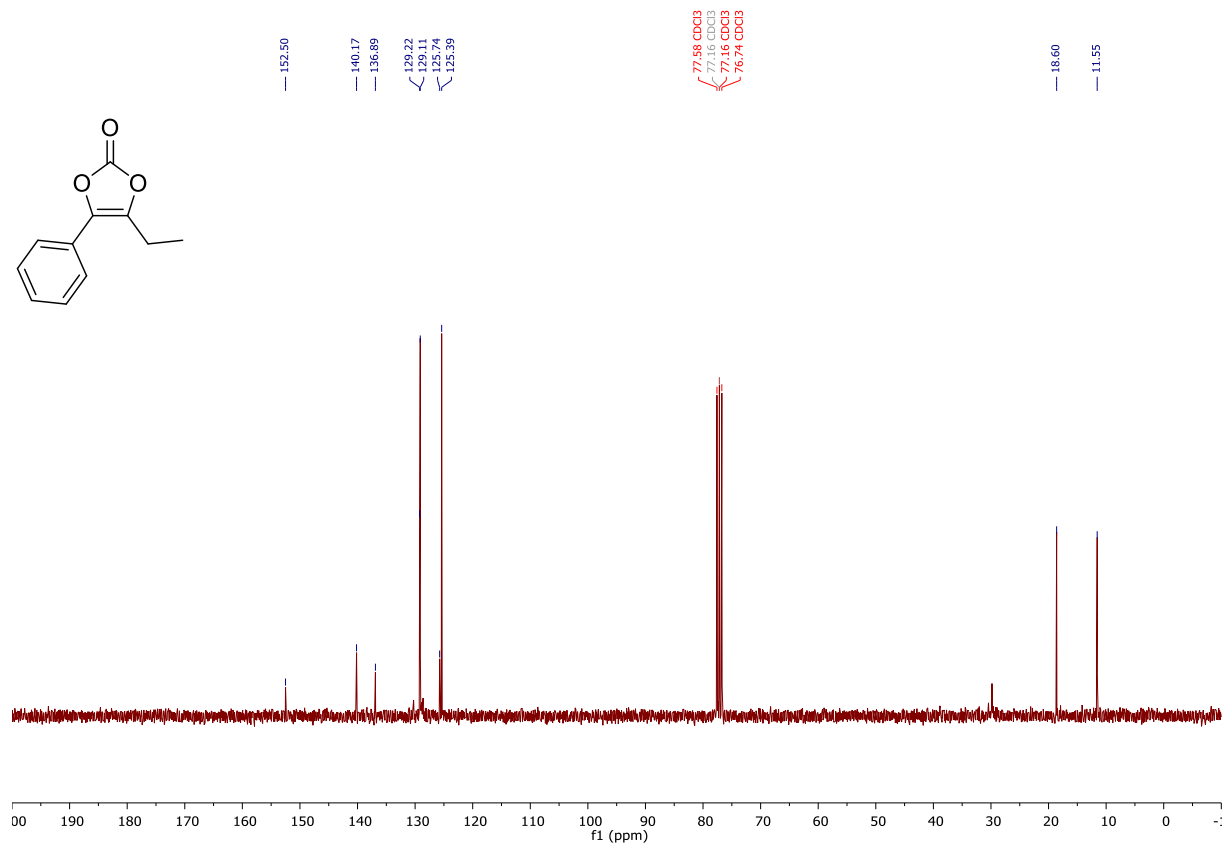

<sup>1</sup>H NMR (300 MHz, CDCl<sub>3</sub>) of 4,5-dimethyl-1,3-dioxol-2-one (**14**).

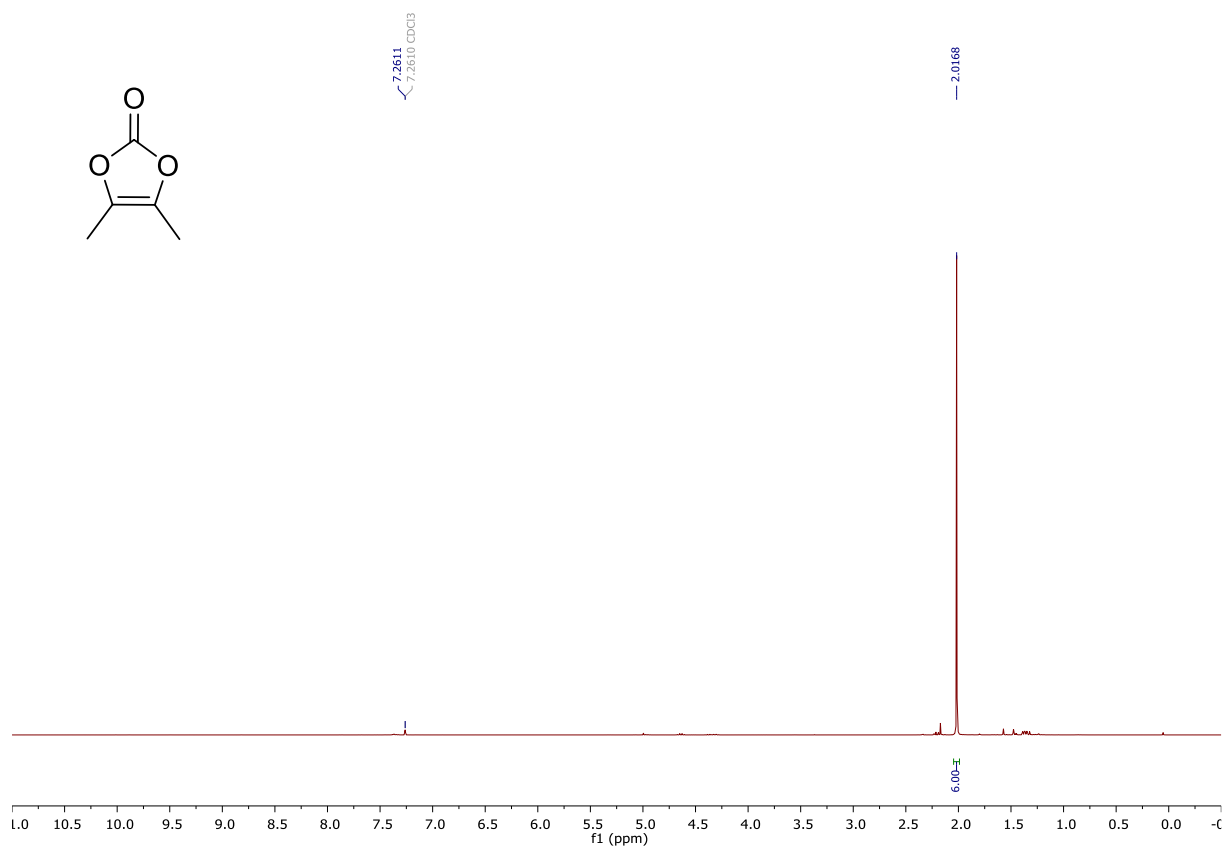

<sup>13</sup>C-NMR (75 MHz, CDCl<sub>3</sub>) of 4,5-dimethyl-1,3-dioxol-2-one (**14**).

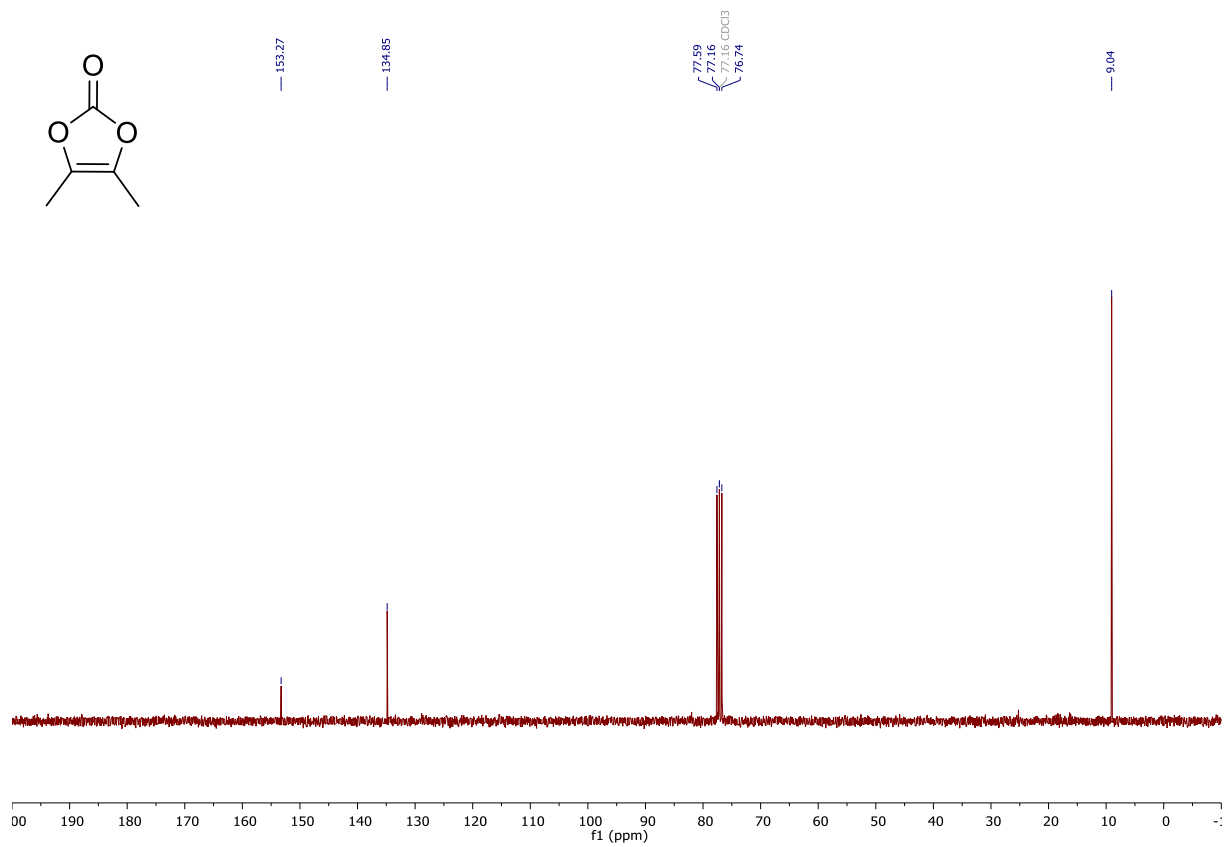

**<sup>1</sup>H NMR (300 MHz, CDCl<sub>3</sub>) of 4,5-diisobutyl-1,3-dioxol-2-one (15).**

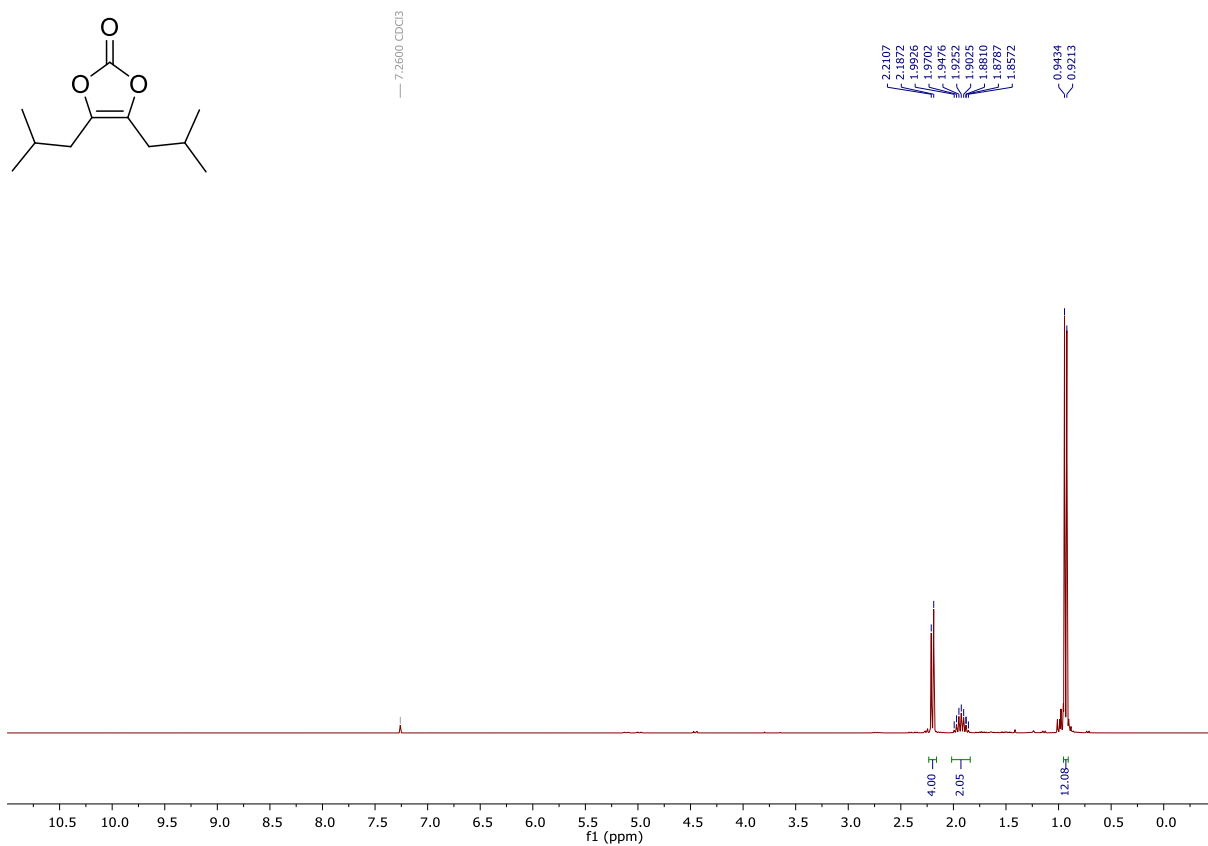

**<sup>13</sup>C-NMR (75 MHz, CDCl<sub>3</sub>) of 4,5-diisobutyl-1,3-dioxol-2-one (15).**

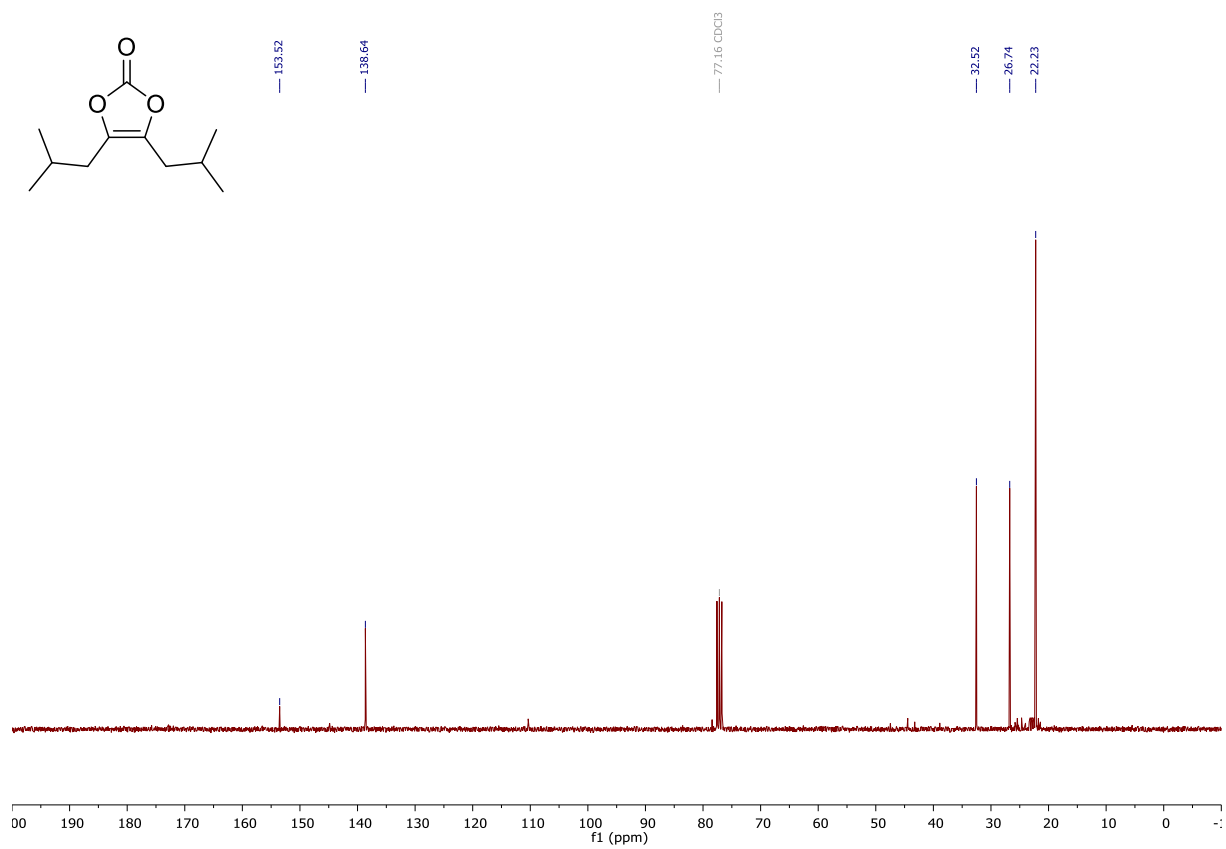



## 8. NMR Mechanistic studies

### 8.1. NMR of benzoin / TBD mixtures

A 0.2 M mother solution of *benzoin* was prepared by dissolving 127.2 mg (0.6 mmol) of benzoin in 3 mL of  $d_6$ -DMSO.

A 0.2 M mother solution of *TBD* was prepared by dissolving 41.7 mg (0.3 mmol) of benzoin in 1.5 mL of  $d_6$ -DMSO.

Five (5) solutions of benzoin / TBD mixtures in  $d_6$ -DMSO were prepared as follows and the solutions were transferred in NMR tubes to record  $^1\text{H}$  and  $^{13}\text{C}$  NMR.

| Benzoin     |          | TBD         |          | $d_6$ -DMSO | Total volume | Molar benzoin / TBD ratio |
|-------------|----------|-------------|----------|-------------|--------------|---------------------------|
| Volume (mL) | n (mmol) | Volume (mL) | n (mmol) | Volume (mL) | (mL)         |                           |
| 0.5         | 0.1      | 0           | 0        | 0.5         | 1            | <b>1 : 0</b>              |
| 0.5         | 0.1      | 0.125       | 0.025    | 0.375       | 1            | <b>1 : 0.25</b>           |
| 0.5         | 0.1      | 0.25        | 0.05     | 0.25        | 1            | <b>1 : 0.5</b>            |
| 0.5         | 0.1      | 0.375       | 0.075    | 0.125       | 1            | <b>1 : 0.75</b>           |
| 0.5         | 0.1      | 0.5         | 0.1      | 0           | 1            | <b>1 : 0</b>              |

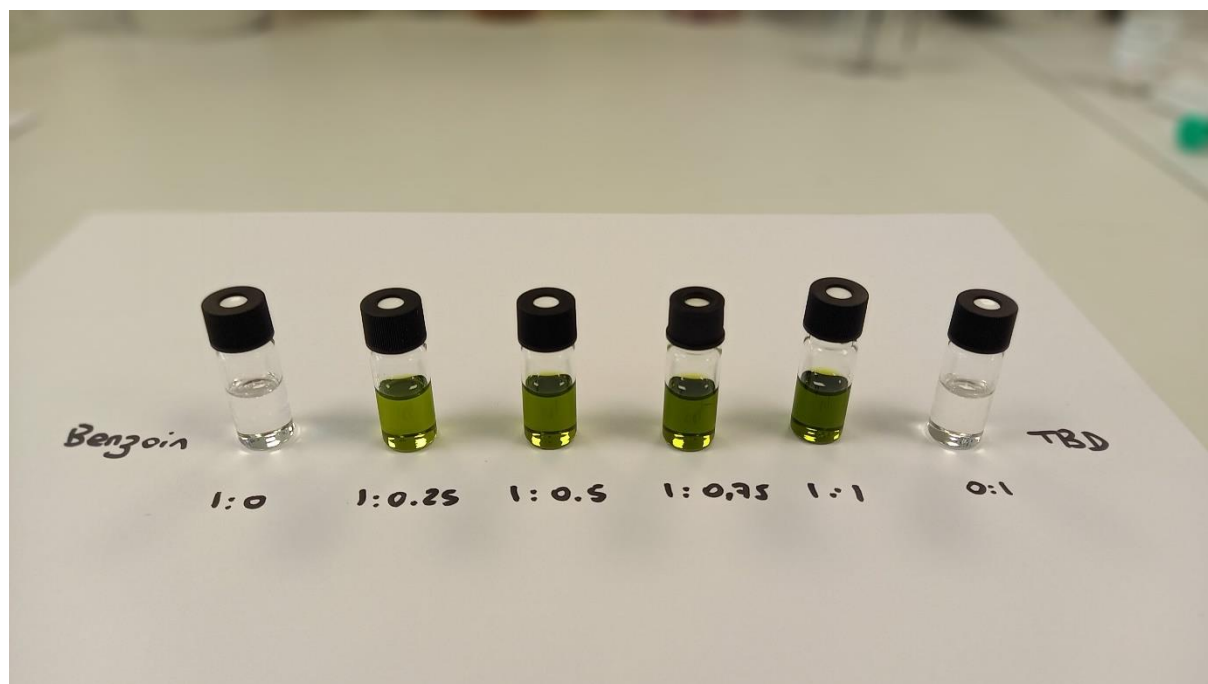

Figure S3. Picture of the solutions of benzoin / TBD mixtures in  $d_6$ -DMSO (before transferring to NMR tubes)

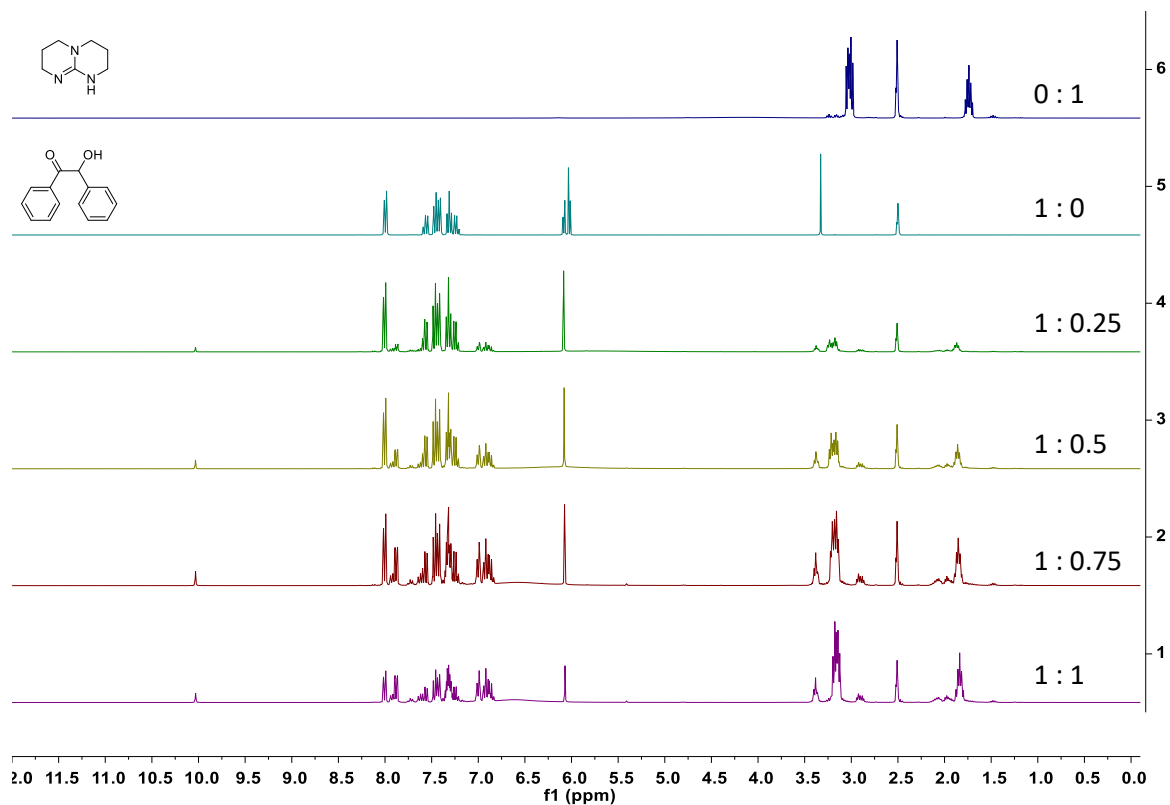

Figure S4. Superimposition of  $^1\text{H}$  NMR (300 MHz,  $d_6$ -DMSO) spectra of benzoic acid / TBD mixtures.

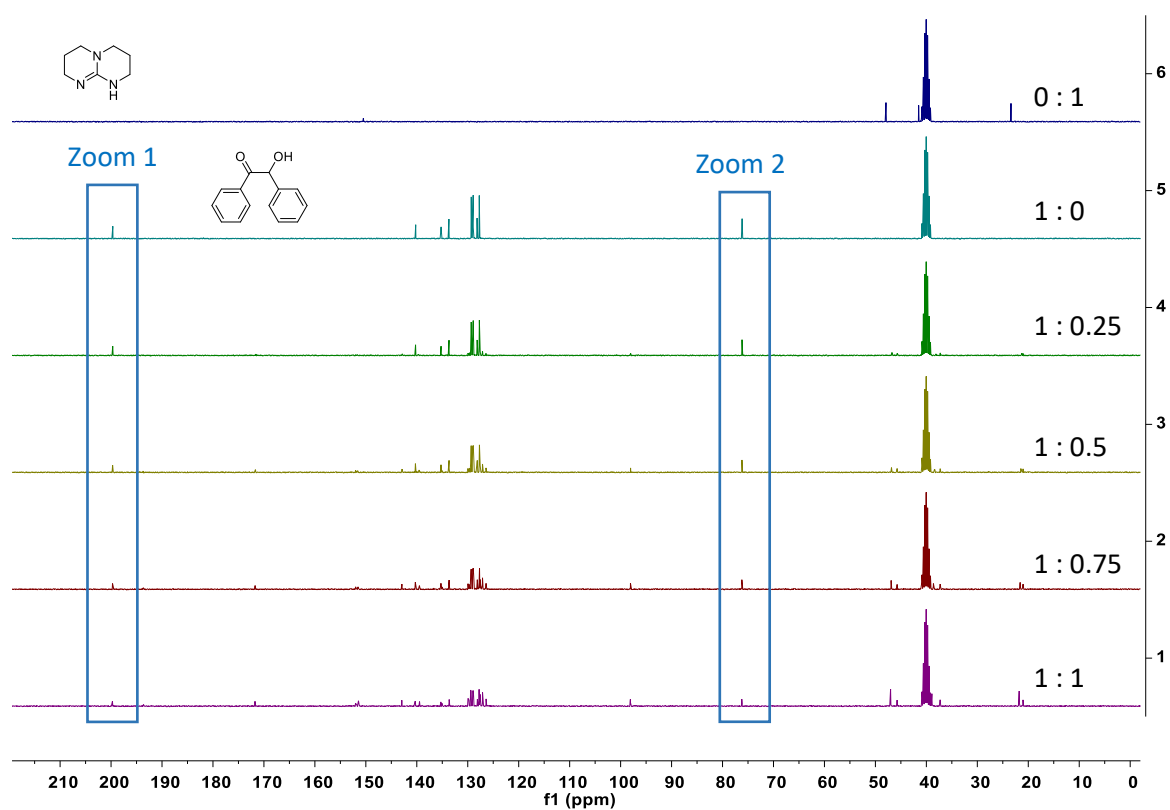

Figure S5. Superimposition of  $^{13}\text{C}$  NMR (75 MHz,  $d_6$ -DMSO) spectra of benzoic acid / TBD mixtures.

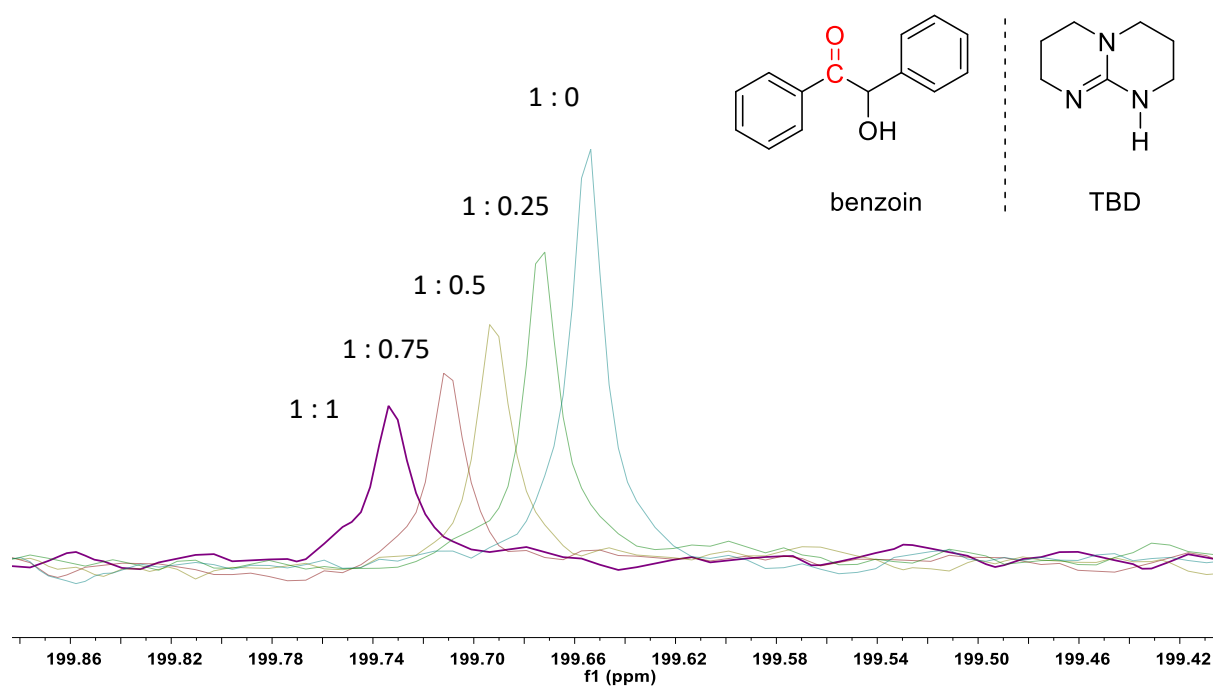

**Figure S6.** Superimposition of  $^{13}\text{C}$  NMR (75 MHz,  $d_6$ -DMSO) spectra of benzoin / TBD mixtures (stacked, zoom 1 of the carbonyl region).

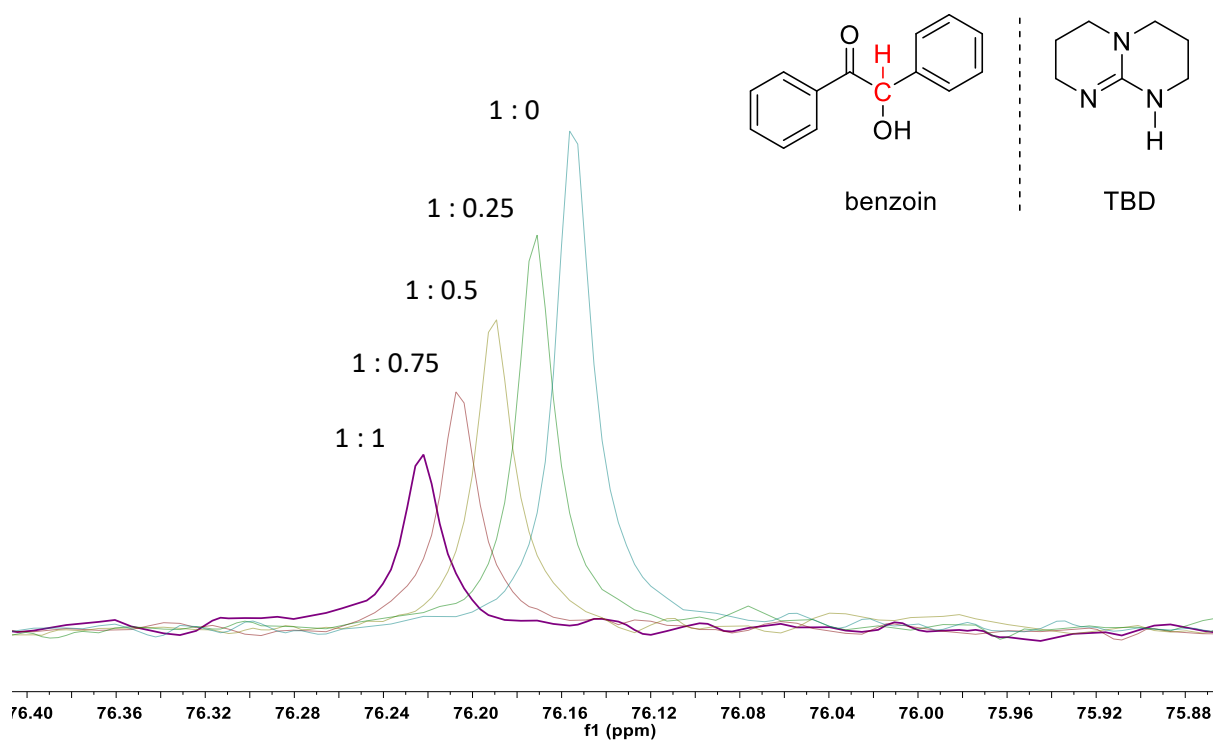

**Figure S7.** Superimposition of  $^{13}\text{C}$  NMR (75 MHz,  $d_6$ -DMSO) spectra of benzoin / TBD mixtures (stacked, zoom 2 of the CH region).

## 8.2. NMR of diphenyl carbonate / TBD mixtures

A 0.2 M mother solution of *diphenyl carbonate* was prepared by dissolving 128.4 mg (0.6 mmol) of benzoin in 3 mL of  $d_6$ -DMSO.

A 0.2 M mother solution of *TBD* was prepared by dissolving 41.7 mg (0.3 mmol) of benzoin in 1.5 mL of  $d_6$ -DMSO.

Five (5) solutions of diphenyl carbonate / TBD mixtures in  $d_6$ -DMSO were prepared as follows and the solutions were transferred in NMR tubes to record  $^1\text{H}$  and  $^{13}\text{C}$  NMR.

| Diphenyl carbonate |          | TBD         |          | $d_6$ -DMSO | Total volume | Molar benzoin / TBD ratio |
|--------------------|----------|-------------|----------|-------------|--------------|---------------------------|
| Volume (mL)        | n (mmol) | Volume (mL) | n (mmol) | Volume (mL) | (mL)         |                           |
| 0.5                | 0.1      | 0           | 0        | 0.5         | 1            | <b>1 : 0</b>              |
| 0.5                | 0.1      | 0.125       | 0.025    | 0.375       | 1            | <b>1 : 0.25</b>           |
| 0.5                | 0.1      | 0.25        | 0.05     | 0.25        | 1            | <b>1 : 0.5</b>            |
| 0.5                | 0.1      | 0.375       | 0.075    | 0.125       | 1            | <b>1 : 0.75</b>           |
| 0.5                | 0.1      | 0.5         | 0.1      | 0           | 1            | <b>1 : 0</b>              |

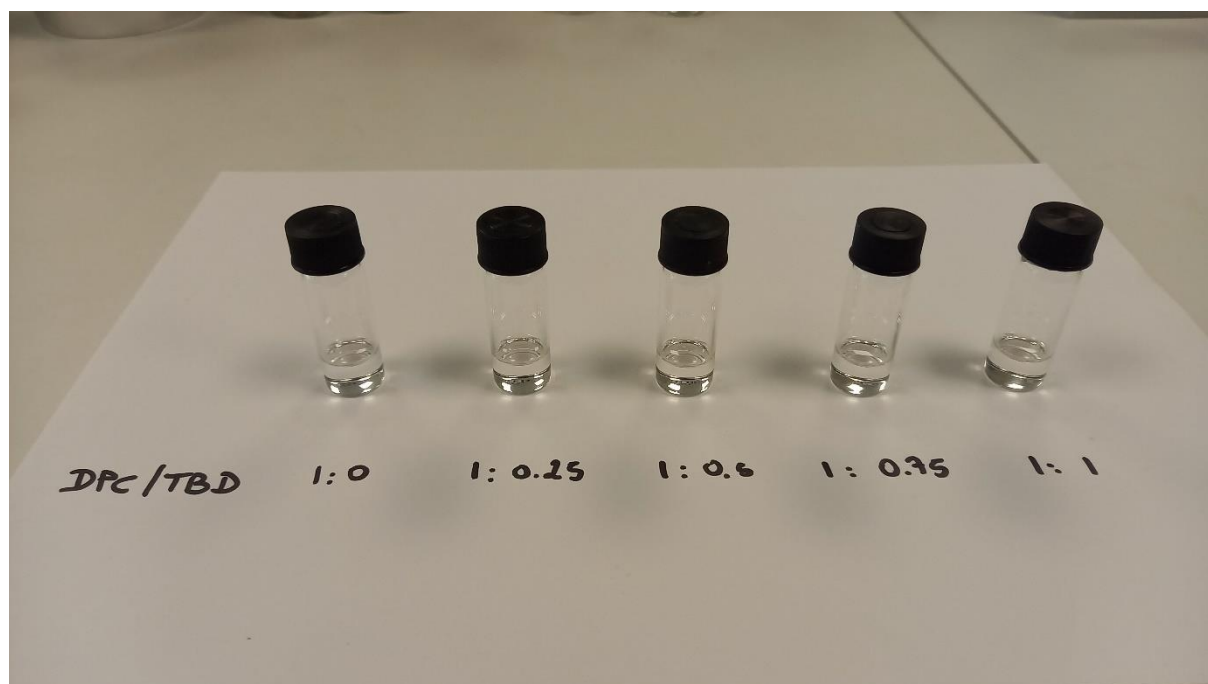

**Figure S8.** Picture of the solutions of diphenyl carbonate / TBD mixtures in  $d_6$ -DMSO (before transferring to NMR tubes)

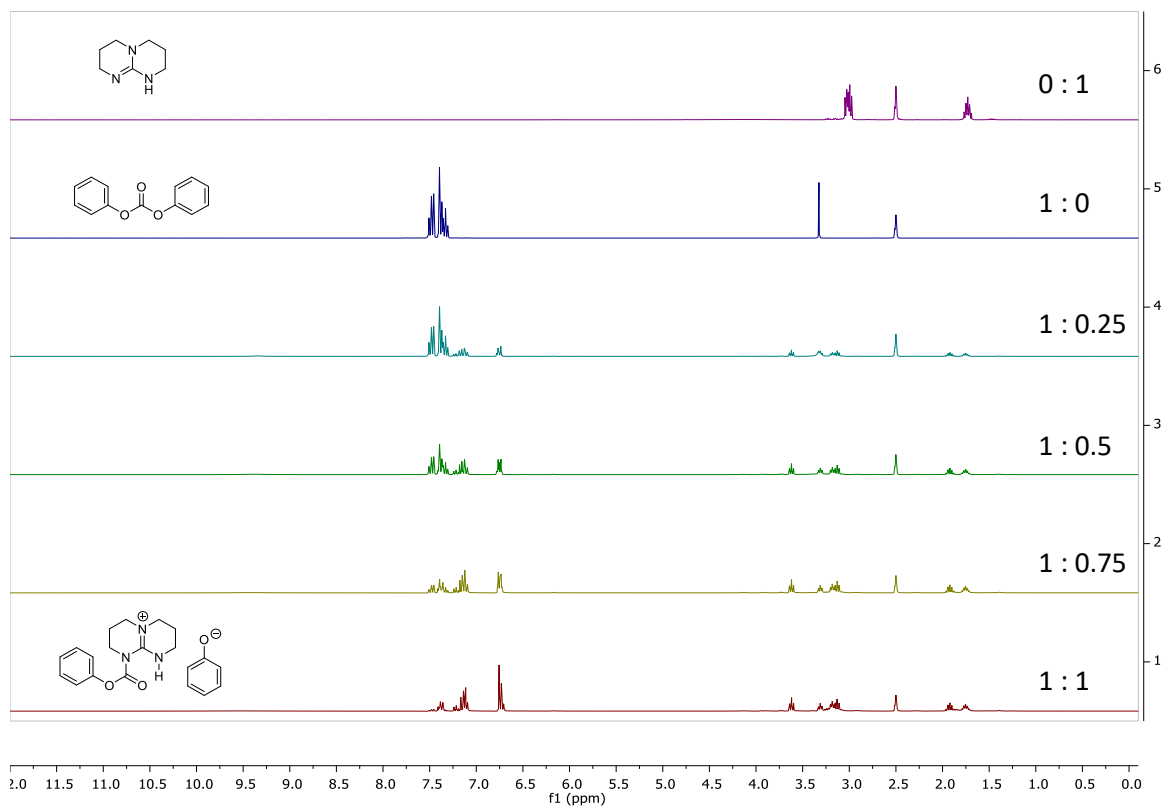

Figure S9. Superimposition of  $^1\text{H}$  NMR (300 MHz,  $d_6$ -DMSO) spectra of diphenyl carbonate / TBD mixtures.

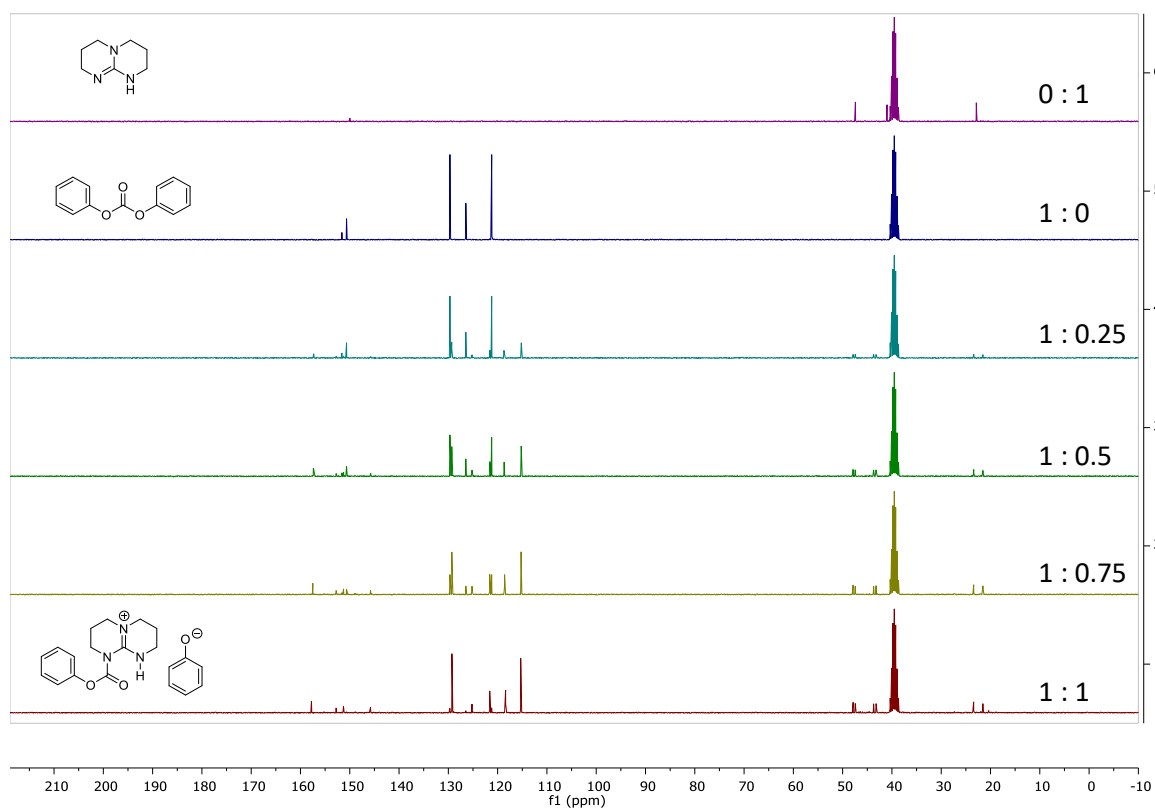

Figure S10. Superimposition of  $^{13}\text{C}$  NMR (75 MHz,  $d_6$ -DMSO) spectra of diphenyl carbonate / TBD mixtures.

**<sup>1</sup>H NMR (300 MHz, *d*<sub>6</sub>-DMSO) of diphenyl carbonate / TBD 1:1 adduct**

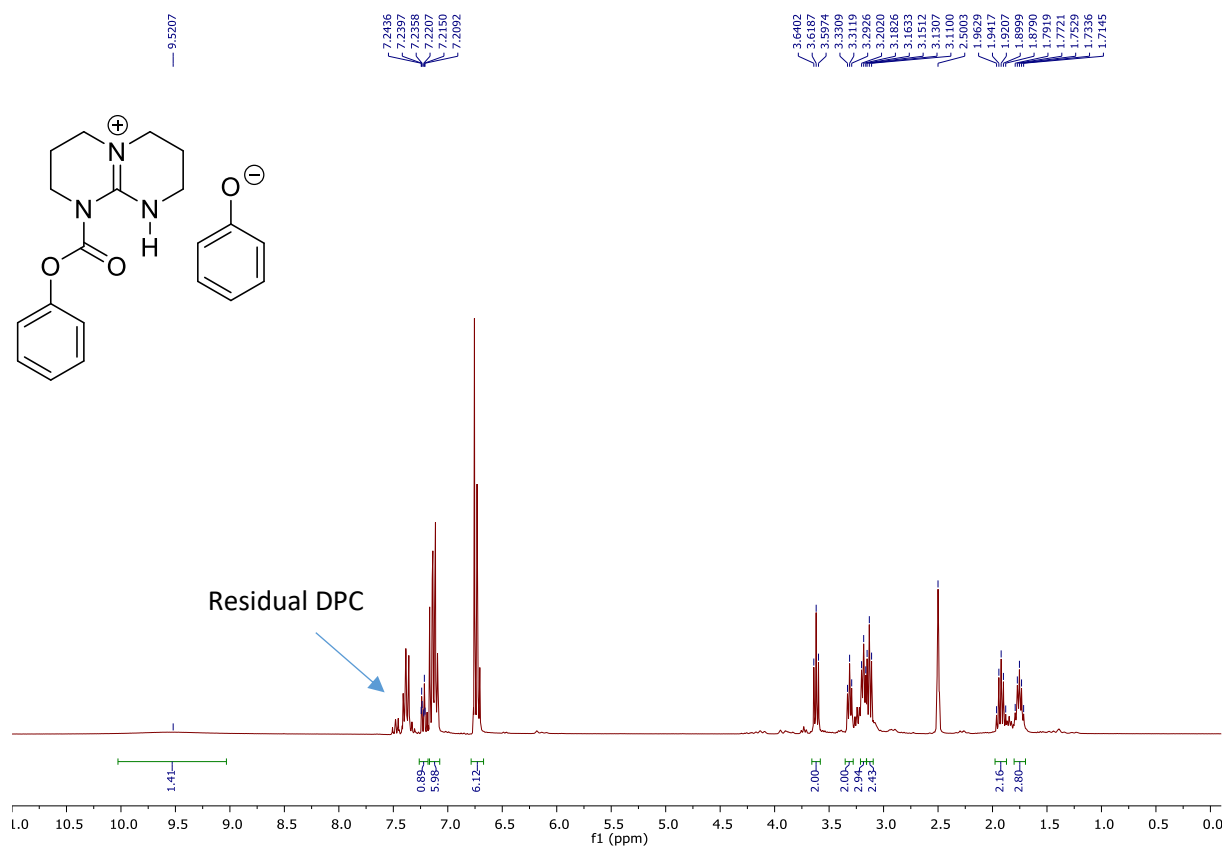

**<sup>13</sup>C NMR (75 MHz, *d*<sub>6</sub>-DMSO) of diphenyl carbonate / TBD 1:1 adduct**

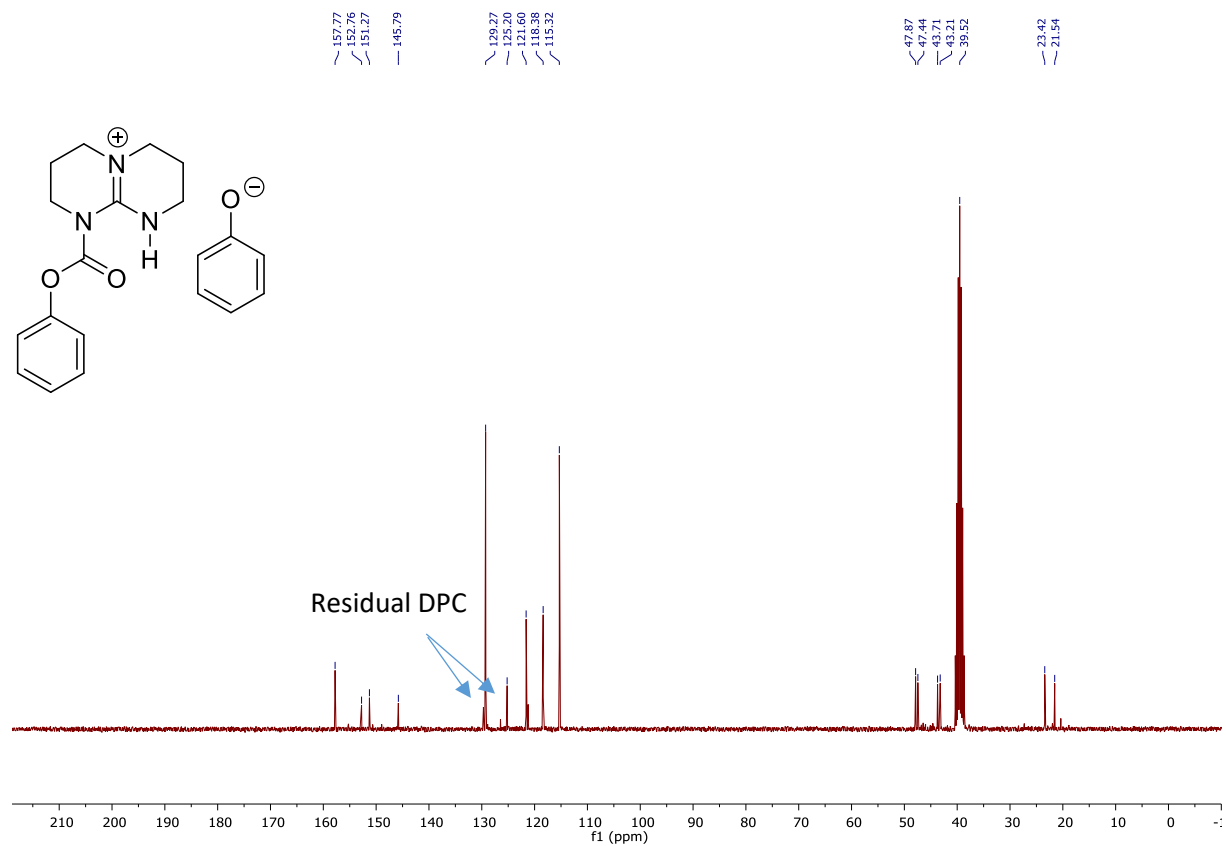

## 9. Mechanism proposal

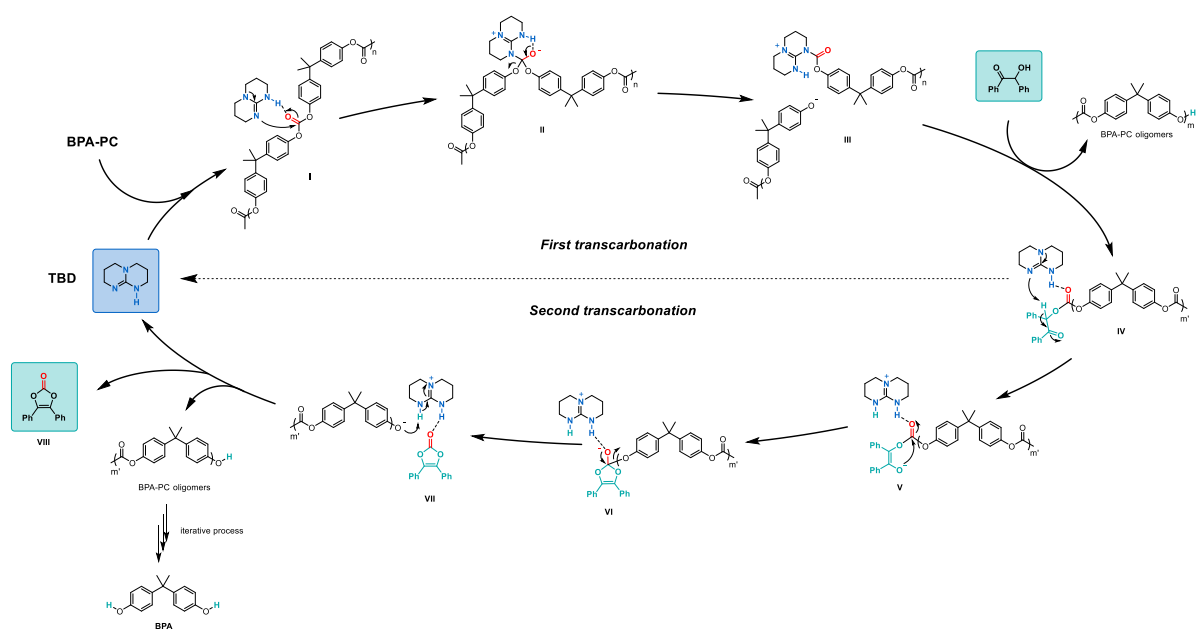

**Figure S11.** Mechanism proposal 1: Transcarbonylation through carbonate activation (preferred).

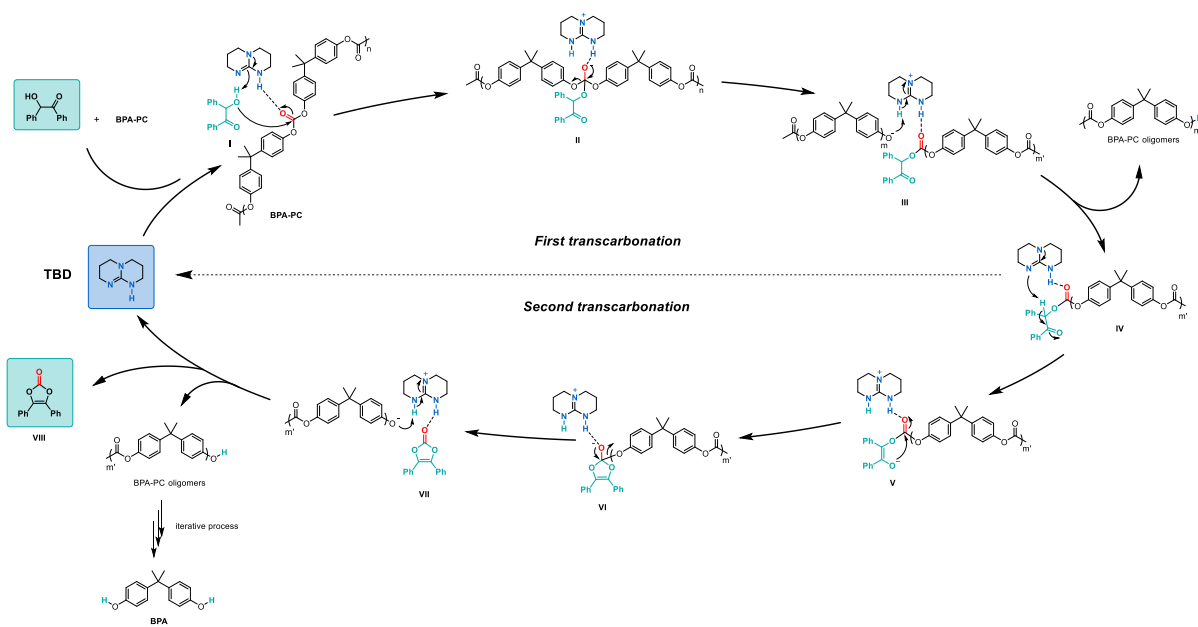

**Figure S12.** Mechanism proposal 2: Transcarbonylation through dual (benzoin/carbonate) activation (alternative)

# 10. High-resolution mass spectrometry of vinylene carbonates

## CENTRE COMMUN DE SPECTROMETRIE DE MASSE

### Analysis Info

Analysis Name Impact2\_201204\_12\_KO-207.d  
 Method Tune\_pos\_Standard.m  
 Comment

Acquisition Date 12/4/2020 5:08:17 PM  
 Instrument / Ser# impact II 1825265.1  
 0001

### Acquisition Parameter

|             |          |                       |           |                  |           |
|-------------|----------|-----------------------|-----------|------------------|-----------|
| Source Type | ESI      | Ion Polarity          | Positive  | Set Nebulizer    | 0.3 Bar   |
| Focus       | Active   | Set Capillary         | 1500 V    | Set Dry Heater   | 200 °C    |
| Scan Begin  | 50 m/z   | Set End Plate Offset  | -500 V    | Set Dry Gas      | 4.0 l/min |
| Scan End    | 1200 m/z | Set Collision Cell RF | 750.0 Vpp | Set Divert Valve | Source    |

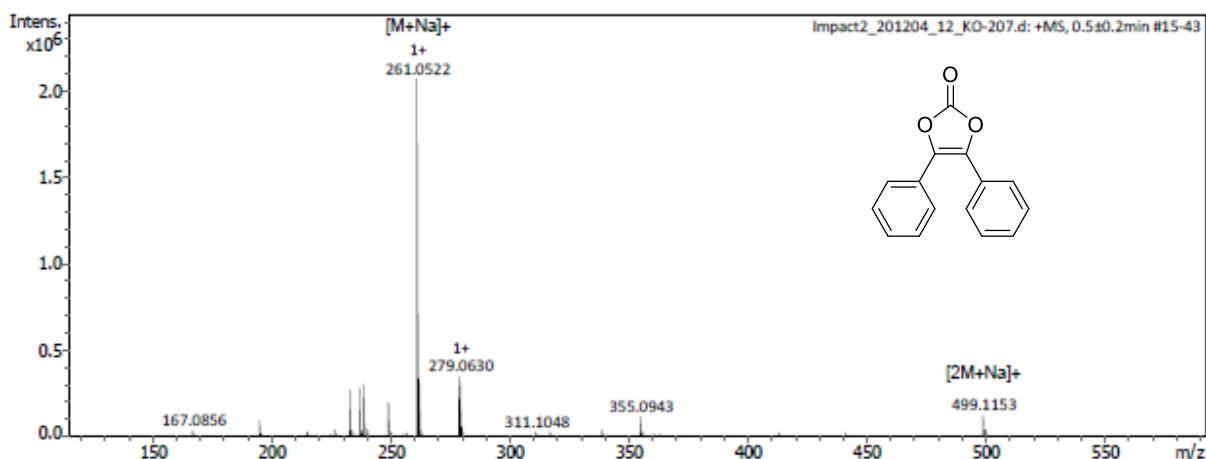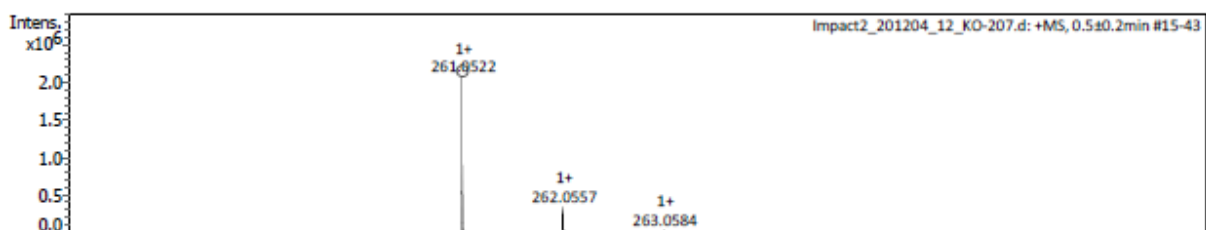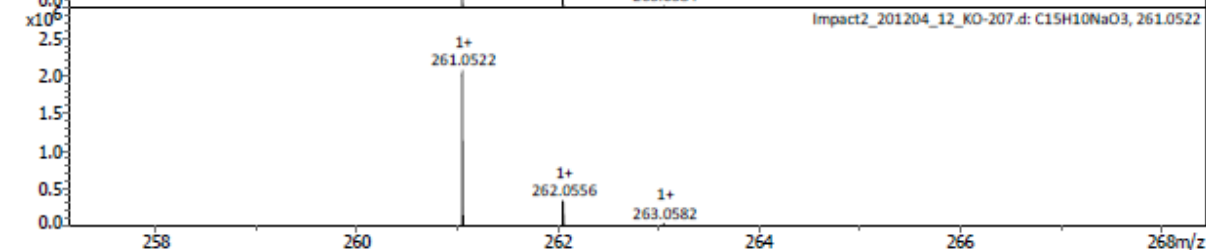

| Meas. m/z | Ion Formula | m/z      | Sum Formula | err [ppm] | mSigma | Adduct | z  |
|-----------|-------------|----------|-------------|-----------|--------|--------|----|
| 239.0702  | C15H11O3    | 239.0703 | C15H10O3    | 0.4       | 5.7    | M+H    | 1+ |
| 261.0522  | C15H10NaO3  | 261.0522 |             | 0.2       | 0.9    | M+Na   | 1+ |
| 499.1153  | C30H20NaO6  | 499.1152 |             | -0.1      | 4.8    | 2M+Na  | 1+ |



CENTRE COMMUN DE SPECTROMETRIE DE MASSE

**Analysis Info**

Analysis Name Impact2\_210507\_01\_KO-338-2-P.d  
 Method Tune\_pos\_Standard.m  
 Comment

Acquisition Date 5/7/2021 8:45:05 AM  
 Instrument / Ser# impact II 1825265.1  
 0081

**Acquisition Parameter**

|             |          |                       |           |                  |           |
|-------------|----------|-----------------------|-----------|------------------|-----------|
| Source Type | ESI      | Ion Polarity          | Positive  | Set Nebulizer    | 0.3 Bar   |
| Focus       | Active   | Set Capillary         | 4500 V    | Set Dry Heater   | 200 °C    |
| Scan Begin  | 50 m/z   | Set End Plate Offset  | -500 V    | Set Dry Gas      | 4.0 l/min |
| Scan End    | 1200 m/z | Set Collision Cell RF | 750.0 Vpp | Set Divert Valve | Source    |

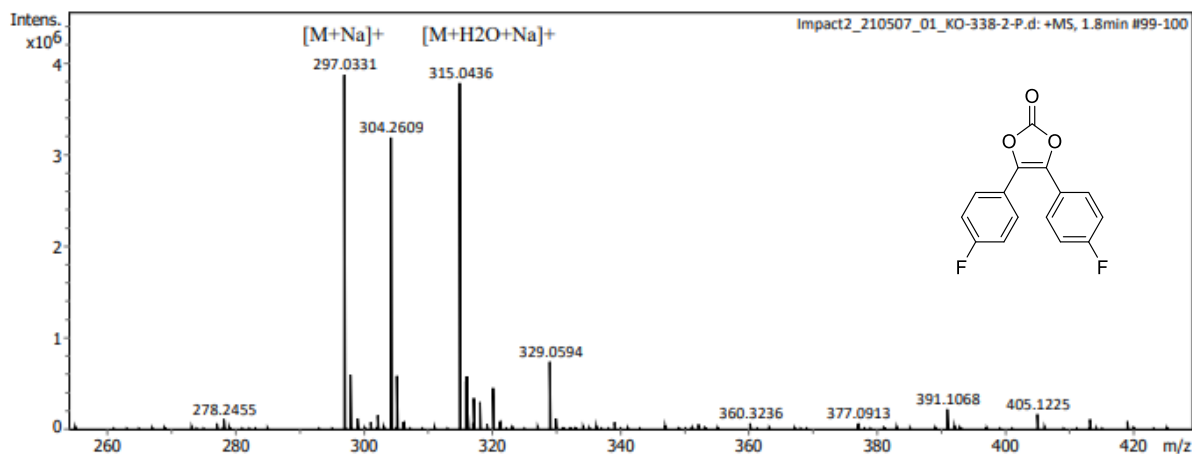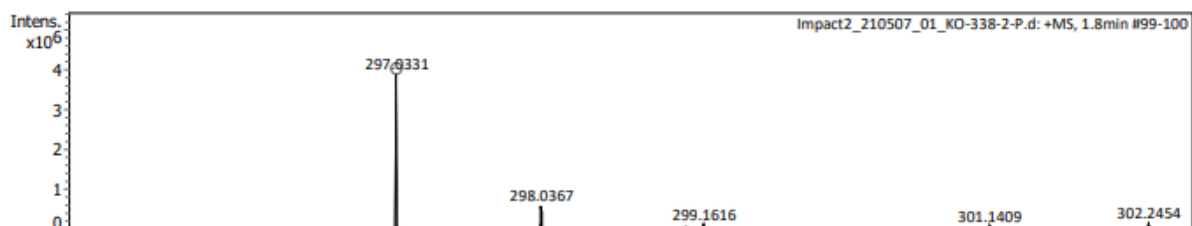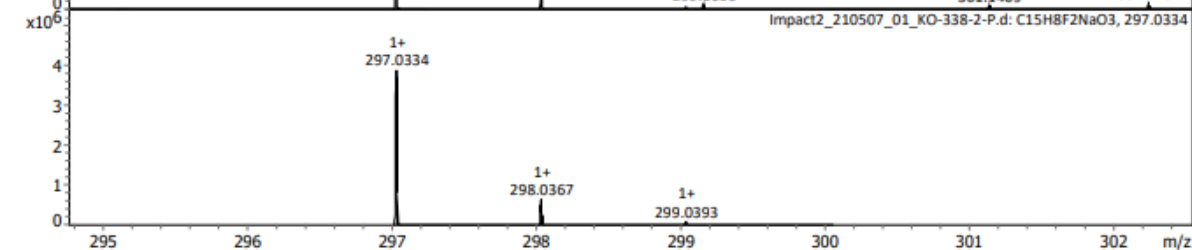

| Meas. m/z | Ion Formula  | m/z      | Sum Formula | err [ppm] | mSigma | Adduct | z  |
|-----------|--------------|----------|-------------|-----------|--------|--------|----|
| 297.0331  | C15H8F2NaO3  | 297.0334 | C15H8F2O3   | 0.8       | 4.8    | M+Na   | 1+ |
| 315.0436  | C15H10F2NaO4 | 315.0439 | C15H10F2O4  | 1.0       | 6.4    | M+Na   | 1+ |

CENTRE COMMUN DE SPECTROMETRIE DE MASSE

**Analysis Info**

Analysis Name Impact2\_210301\_06\_KO-335-P.d  
 Method Tune\_pos\_Standard.m

Acquisition Date 3/1/2021 11:23:41 AM  
 Instrument / Ser# impact II 1825265.1  
 0081

**Acquisition Parameter**

|             |          |                       |           |                  |           |
|-------------|----------|-----------------------|-----------|------------------|-----------|
| Source Type | ESI      | Ion Polarity          | Positive  | Set Nebulizer    | 0.3 Bar   |
| Focus       | Active   | Set Capillary         | 4500 V    | Set Dry Heater   | 200 °C    |
| Scan Begin  | 110 m/z  | Set End Plate Offset  | -500 V    | Set Dry Gas      | 4.0 l/min |
| Scan End    | 1000 m/z | Set Collision Cell RF | 750.0 Vpp | Set Divert Valve | Source    |

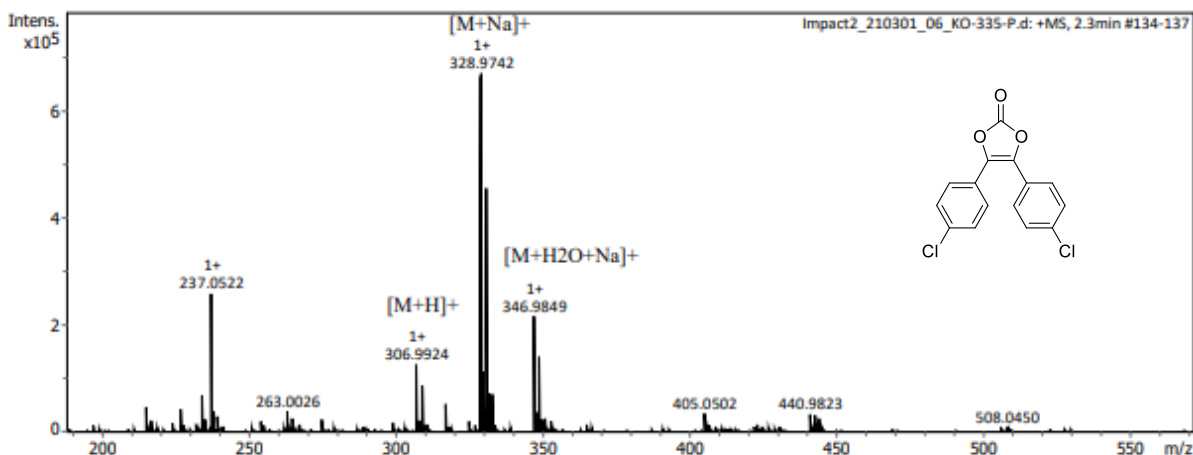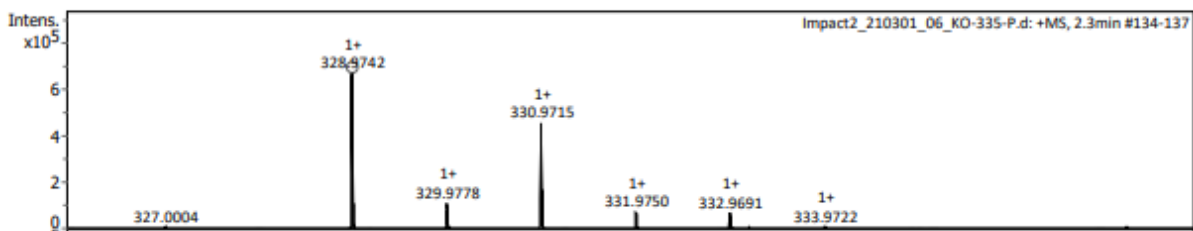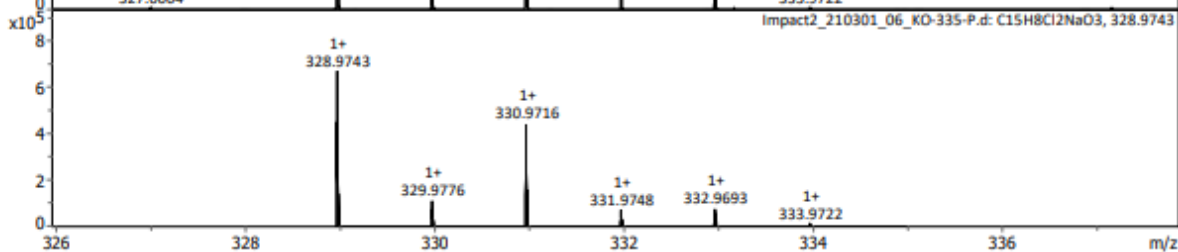

| Meas. m/z | Ion Formula   | m/z      | Sum Formula  | err [ppm] | mSigma | Adduct | z  |
|-----------|---------------|----------|--------------|-----------|--------|--------|----|
| 306.9924  | C15H9Cl2O3    | 306.9923 | C15H8Cl2O3   | -0.3      | 10.7   | M+H    | 1+ |
| 328.9742  | C15H8Cl2NaO3  | 328.9743 | C15H8Cl2NaO3 | 0.1       | 10.0   | M+Na   | 1+ |
| 346.9849  | C15H10Cl2NaO4 | 346.9848 | C15H10Cl2O4  | -0.2      | 5.4    | M+Na   | 1+ |

# CENTRE COMMUN DE SPECTROMETRIE DE MASSE

## Analysis Info

Analysis Name Impact2\_210303\_03\_LI-2-P.d  
 Method Tune\_pos\_Standard.m  
 Comment

Acquisition Date 3/3/2021 8:27:07 AM  
 Instrument / Ser# impact II 1825265.1  
 0081

## Acquisition Parameter

|             |          |                       |           |                  |           |
|-------------|----------|-----------------------|-----------|------------------|-----------|
| Source Type | ESI      | Ion Polarity          | Positive  | Set Nebulizer    | 0.3 Bar   |
| Focus       | Active   | Set Capillary         | 4500 V    | Set Dry Heater   | 200 °C    |
| Scan Begin  | 50 m/z   | Set End Plate Offset  | -500 V    | Set Dry Gas      | 4.0 l/min |
| Scan End    | 1200 m/z | Set Collision Cell RF | 750.0 Vpp | Set Divert Valve | Source    |

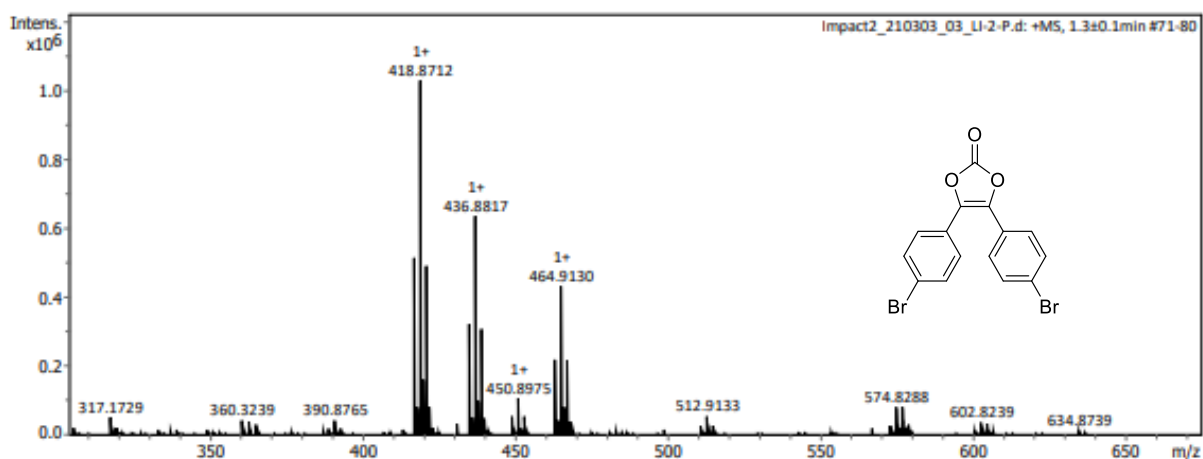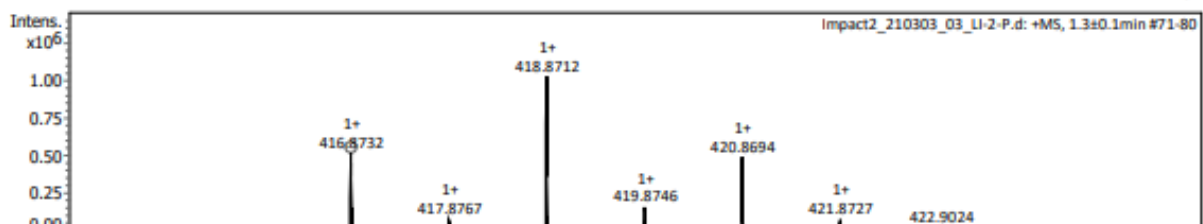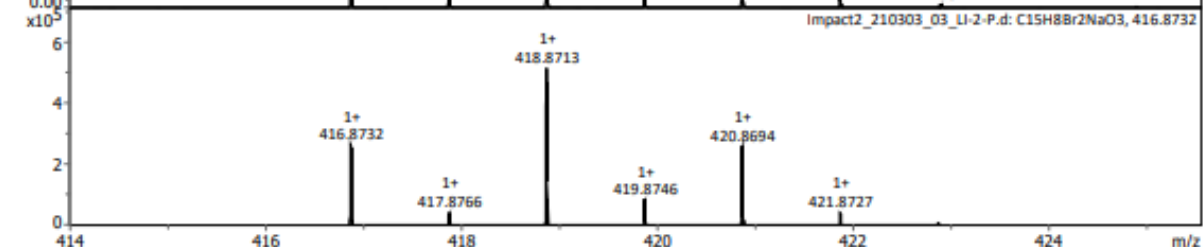

| Meas. m/z | Ion Formula  | m/z      | Sum Formula | err [ppm] | mSigma | Adduct | z  |
|-----------|--------------|----------|-------------|-----------|--------|--------|----|
| 416.8732  | C15H8Br2NaO3 | 416.8732 | C15H8Br2O3  | 0.2       | 10.5   | M+Na   | 1+ |

CENTRE COMMUN DE SPECTROMETRIE DE MASSE

**Analysis Info**

Analysis Name Impact2\_210510\_01\_KO-397-P.d  
 Method Tune\_pos\_Standard.m  
 Comment

Acquisition Date 5/10/2021 10:42:13 AM  
 Instrument / Ser# impact II 1825265.1  
 0081

**Acquisition Parameter**

|             |          |                       |           |                  |           |
|-------------|----------|-----------------------|-----------|------------------|-----------|
| Source Type | ESI      | Ion Polarity          | Positive  | Set Nebulizer    | 0.3 Bar   |
| Focus       | Active   | Set Capillary         | 1200 V    | Set Dry Heater   | 200 °C    |
| Scan Begin  | 50 m/z   | Set End Plate Offset  | -500 V    | Set Dry Gas      | 4.0 l/min |
| Scan End    | 1200 m/z | Set Collision Cell RF | 750.0 Vpp | Set Divert Valve | Source    |

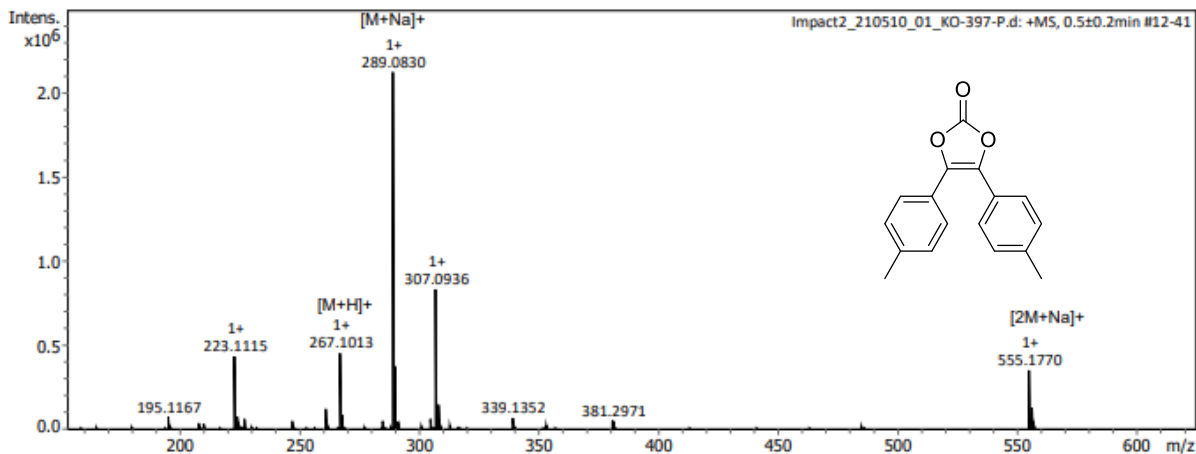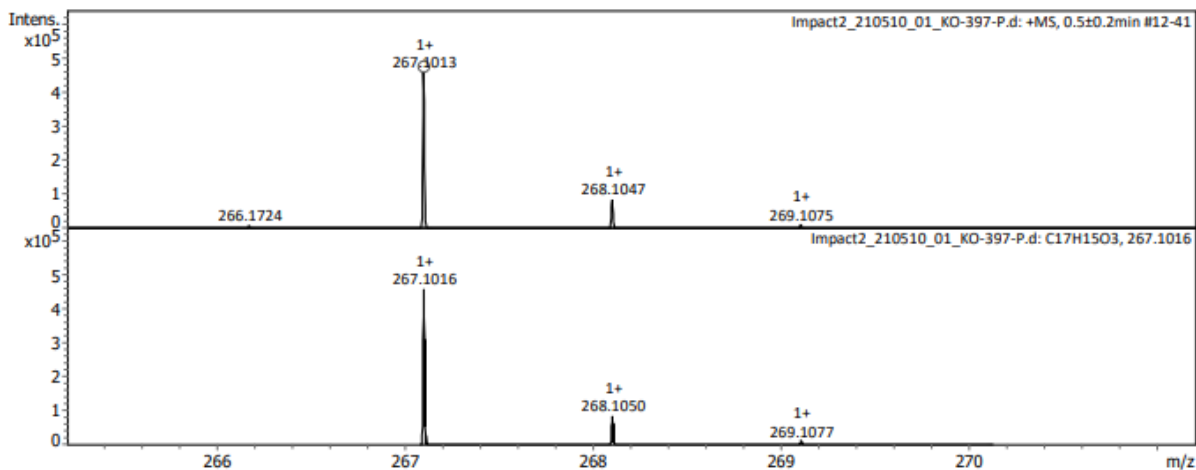

| Meas. m/z | Ion Formula | m/z      | Sum Formula | err [ppm] | mSigma | Adduct | z  |
|-----------|-------------|----------|-------------|-----------|--------|--------|----|
| 267.1013  | C17H15O3    | 267.1016 | C17H14O3    | 1.0       | 0.8    | M+H    | 1+ |
| 289.0830  | C17H14NaO3  | 289.0835 |             | 1.7       | 5.9    | M+Na   | 1+ |
| 555.1770  | C34H28NaO6  | 555.1778 |             | 1.5       | 5.3    | 2M+Na  | 1+ |

CENTRE COMMUN DE SPECTROMETRIE DE MASSE

**Analysis Info**

Analysis Name Impact2\_201204\_13\_KO-217.d  
 Method Tune\_pos\_Standard.m  
 Comment  
 Acquisition Date 12/4/2020 5:14:59 PM  
 Instrument / Ser# impact II 1825265.1  
 0081

**Acquisition Parameter**

|             |          |                       |           |                    |           |
|-------------|----------|-----------------------|-----------|--------------------|-----------|
| Source Type | ESI      | Ion Polarity          | Positive  | Set Nebulzer       | 0.3 Bar   |
| Focus       | Active   | Set Capillary         | 1500 V    | Set Dry Heater     | 200 °C    |
| Scan Begin  | 50 m/z   | Set End Plate Offset  | -500 V    | Set Dry Gas        | 4.0 l/min |
| Scan End    | 1200 m/z | Set Collision Cell RF | 750.0 Vpp | Set Diverter Valve | Source    |

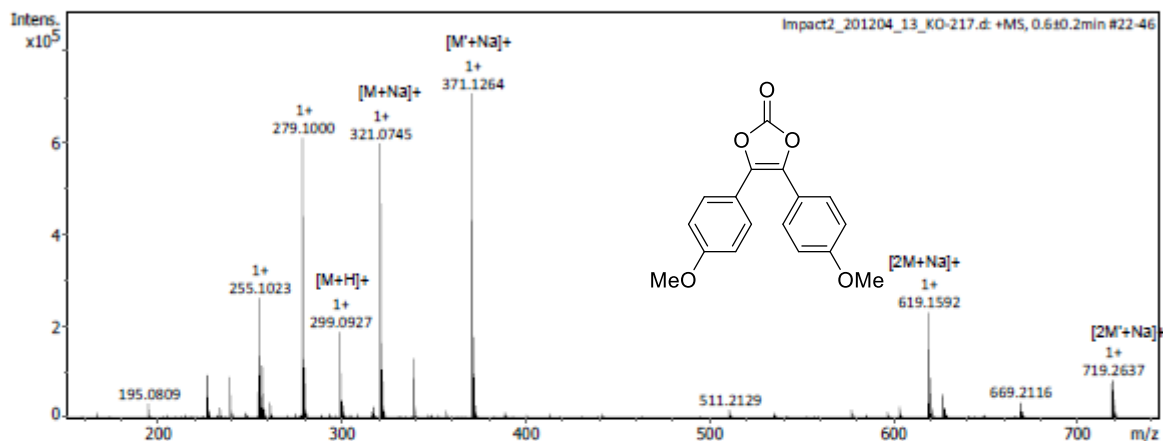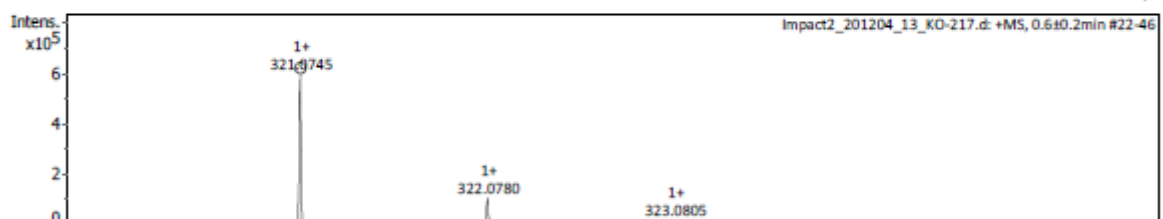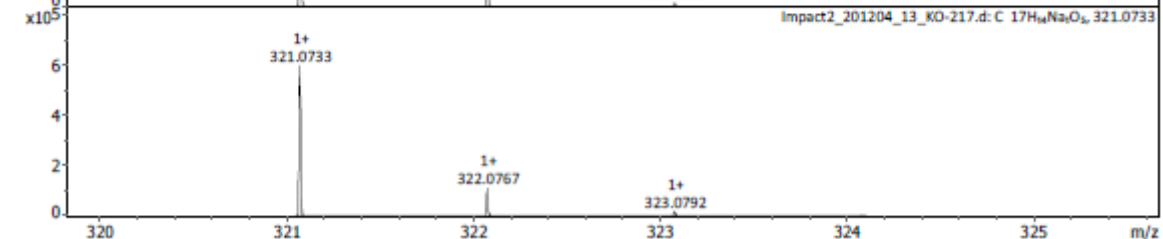

| Meas. m/z | Ion Formula | m/z      | Sum Formula | err [ppm] | mSigma | Adduct | z  |
|-----------|-------------|----------|-------------|-----------|--------|--------|----|
| 299.0927  | C17H15O5    | 299.0914 | C17H14O5    | -4.2      | 18.2   | M+H    | 1+ |
| 321.0745  | C17H14NaO5  | 321.0733 |             | -3.7      | 6.3    | M+Na   | 1+ |
| 619.1592  | C34H28NaO10 | 619.1575 |             | -2.7      | 0.8    | 2M+Na  | 1+ |

CENTRE COMMUN DE SPECTROMETRIE DE MASSE

**Analysis Info**

Analysis Name Impact2\_210427\_27\_KO-378-P.d  
 Method Tune\_pos\_Standard.m  
 Comment

Acquisition Date 4/27/2021 6:06:11 PM  
 Instrument / Ser# impact II 1825265.1  
 0081

**Acquisition Parameter**

|             |          |                       |           |                  |           |
|-------------|----------|-----------------------|-----------|------------------|-----------|
| Source Type | ESI      | Ion Polarity          | Positive  | Set Nebulizer    | 0.3 Bar   |
| Focus       | Active   | Set Capillary         | 3500 V    | Set Dry Heater   | 200 °C    |
| Scan Begin  | 50 m/z   | Set End Plate Offset  | -500 V    | Set Dry Gas      | 4.0 l/min |
| Scan End    | 1200 m/z | Set Collision Cell RF | 750.0 Vpp | Set Divert Valve | Source    |

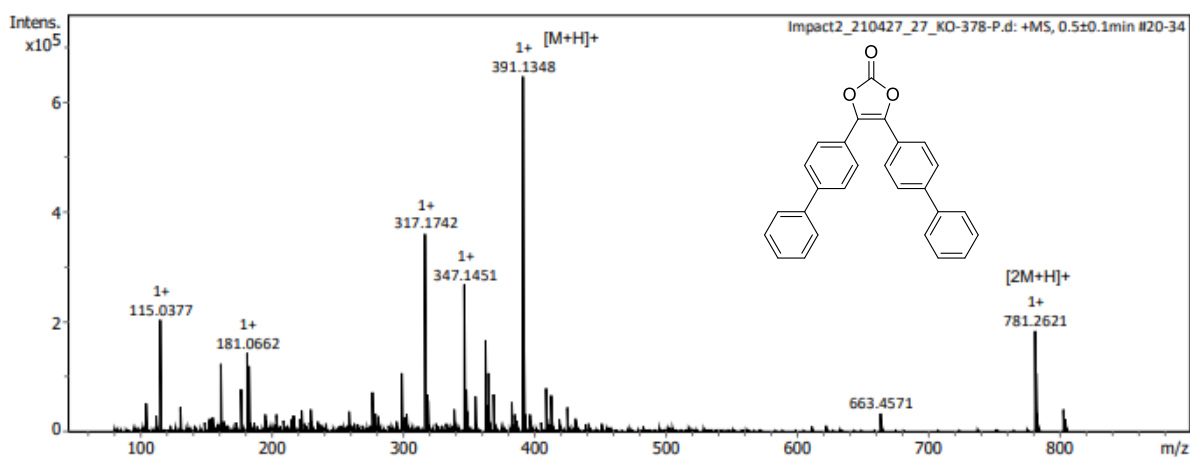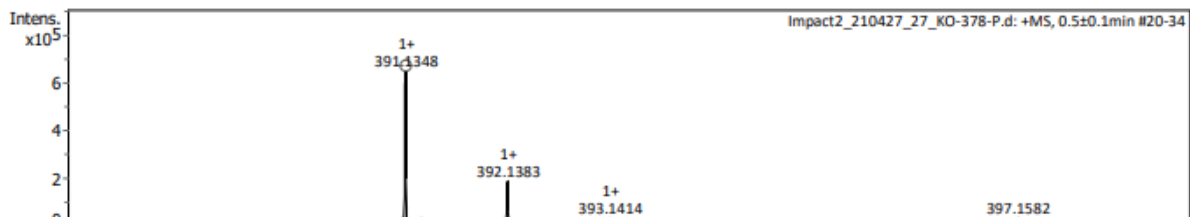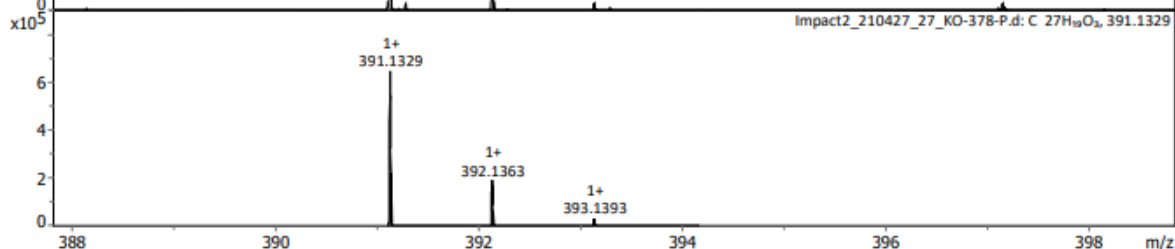

| Meas. m/z | Ion Formula | m/z      | Sum Formula | err [ppm] | mSigma | Adduct | z  |
|-----------|-------------|----------|-------------|-----------|--------|--------|----|
| 391.1348  | C27H19O3    | 391.1329 | C27H18O3    | -5.0      | 3.2    | M+H    | 1+ |
| 781.2621  | C54H37O6    | 781.2585 |             | -4.6      | 6.0    | 2M+H   | 1+ |
| 803.2442  | C54H36NaO6  | 803.2404 |             | -4.8      | 7.6    | 2M+Na  | 1+ |

# CENTRE COMMUN DE SPECTROMETRIE DE MASSE

## Analysis Info

Analysis Name Impact2\_210701\_06\_KO-446-p.d  
 Method Tune\_pos\_Standard.m  
 Comment

Acquisition Date 7/1/2021 6:09:30 PM  
 Instrument / Ser# impact II 1825265.1  
 0081

## Acquisition Parameter

|             |          |                       |           |                  |           |
|-------------|----------|-----------------------|-----------|------------------|-----------|
| Source Type | ESI      | Ion Polarity          | Positive  | Set Nebulizer    | 0.3 Bar   |
| Focus       | Active   | Set Capillary         | 1500 V    | Set Dry Heater   | 200 °C    |
| Scan Begin  | 50 m/z   | Set End Plate Offset  | -500 V    | Set Dry Gas      | 4.0 l/min |
| Scan End    | 1200 m/z | Set Collision Cell RF | 750.0 Vpp | Set Divert Valve | Source    |

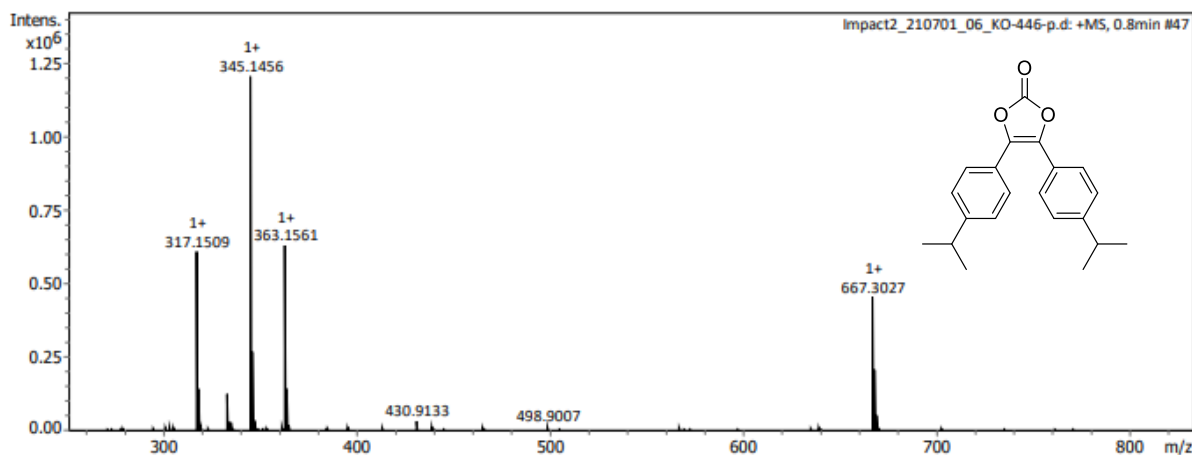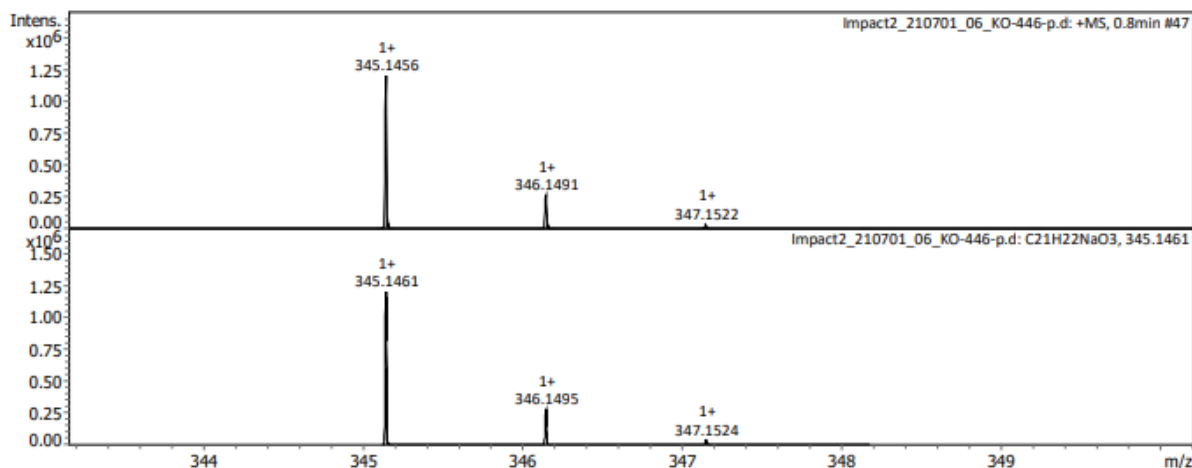

| Meas. m/z | Ion Formula | m/z      | Sum Formula | err [ppm] | mSigma | Adduct | z  |
|-----------|-------------|----------|-------------|-----------|--------|--------|----|
| 345.1456  | C21H22NaO3  | 345.1461 | C21H22O3    | 1.5       | 4.8    | M+Na   | 1+ |
| 667.3027  | C42H44NaO6  | 667.3030 |             | 0.5       | 2.5    | 2M+Na  | 1+ |

## CENTRE COMMUN DE SPECTROMETRIE DE MASSE

### Analysis Info

Analysis Name Impact2\_220603\_04\_MF-95.d  
 Method Tune\_pos\_Standard.m  
 Comment

Acquisition Date 6/3/2022 2:56:55 PM  
 Instrument / Ser# impact II 1825265.1  
 0081

### Acquisition Parameter

|             |          |                       |           |                  |           |
|-------------|----------|-----------------------|-----------|------------------|-----------|
| Source Type | ESI      | Ion Polarity          | Positive  | Set Nebulizer    | 0.3 Bar   |
| Focus       | Active   | Set Capillary         | 1500 V    | Set Dry Heater   | 200 °C    |
| Scan Begin  | 50 m/z   | Set End Plate Offset  | -500 V    | Set Dry Gas      | 4.0 l/min |
| Scan End    | 1000 m/z | Set Collision Cell RF | 750.0 Vpp | Set Divert Valve | Source    |

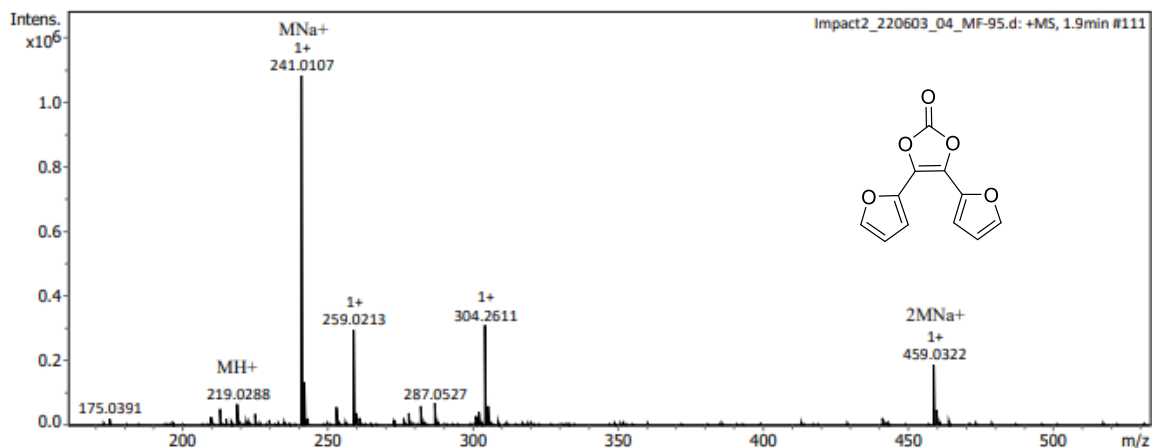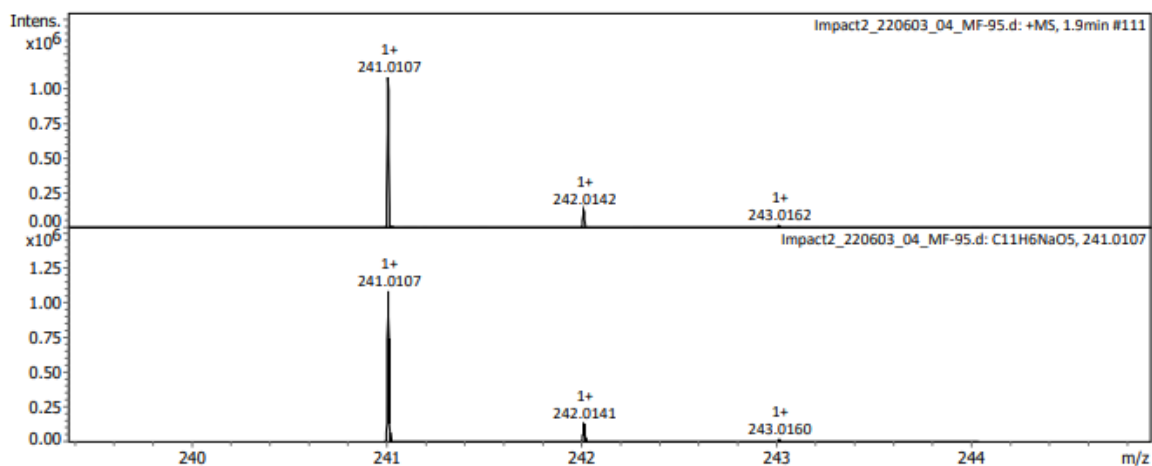

| Meas. m/z | Ion Formula | m/z      | Sum Formula | err [ppm] | mSigma | Adduct | z  |
|-----------|-------------|----------|-------------|-----------|--------|--------|----|
| 219.0288  | C11H7O5     | 219.0288 | C11H6O5     | -0.1      | 5.0    | M+H    | 1+ |
| 241.0107  | C11H6NaO5   | 241.0107 |             | 0.0       | 1.0    | M+Na   | 1+ |
| 459.0322  | C22H12NaO10 | 459.0323 |             | 0.1       | 8.7    | 2M+Na  | 1+ |



CENTRE COMMUN DE SPECTROMETRIE DE MASSE

**Analysis Info**

Analysis Name Impact2\_220630\_01\_MF-97.d  
 Method Tune\_pos\_Standard.m  
 Comment

Acquisition Date 6/30/2022 10:22:54 AM  
 Instrument / Ser# impact II 1825265.1  
 0081

**Acquisition Parameter**

|             |          |                       |           |                  |           |
|-------------|----------|-----------------------|-----------|------------------|-----------|
| Source Type | ESI      | Ion Polarity          | Positive  | Set Nebulizer    | 0.3 Bar   |
| Focus       | Active   | Set Capillary         | 4500 V    | Set Dry Heater   | 200 °C    |
| Scan Begin  | 50 m/z   | Set End Plate Offset  | -500 V    | Set Dry Gas      | 4.0 l/min |
| Scan End    | 1000 m/z | Set Collision Cell RF | 750.0 Vpp | Set Divert Valve | Source    |

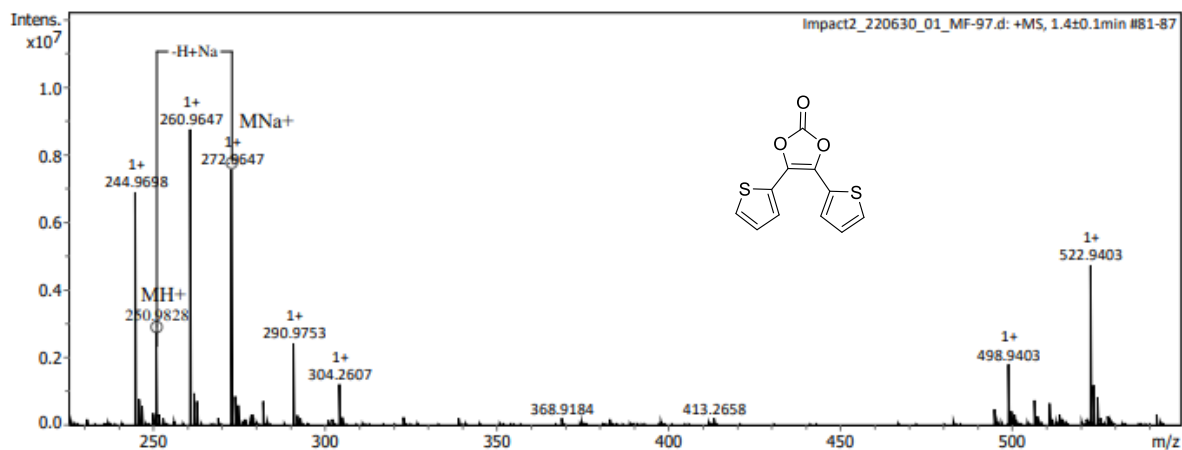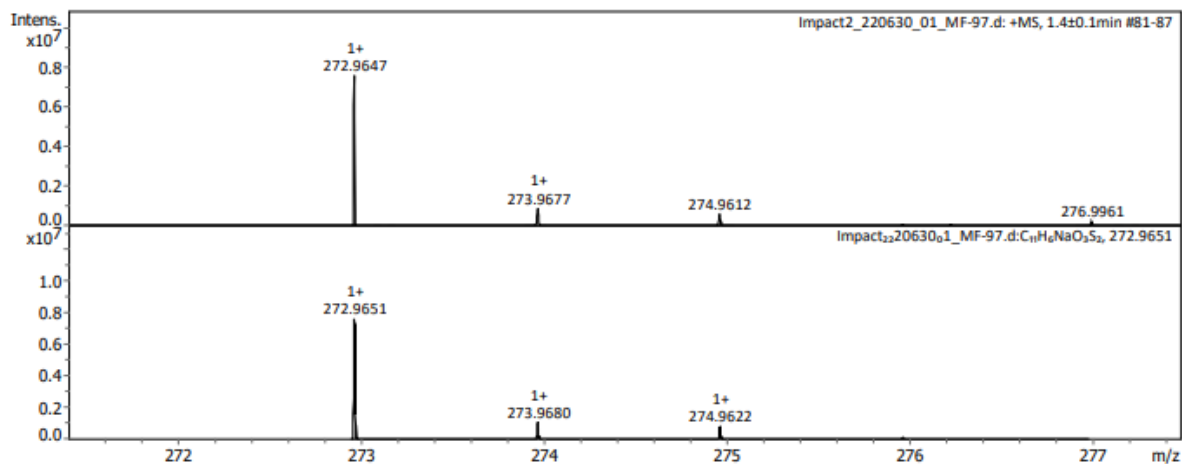

| Meas. m/z | Ion Formula                                                    | m/z      | Sum Formula                                                  | err [ppm] | mSigma | Adduct | z  |
|-----------|----------------------------------------------------------------|----------|--------------------------------------------------------------|-----------|--------|--------|----|
| 250.9828  | C <sub>11</sub> H <sub>7</sub> O <sub>3</sub> S <sub>2</sub>   | 250.9831 | C <sub>11</sub> H <sub>6</sub> O <sub>3</sub> S <sub>2</sub> | 1.4       | 12.5   | M+H    | 1+ |
| 272.9647  | C <sub>11</sub> H <sub>6</sub> NaO <sub>3</sub> S <sub>2</sub> | 272.9651 |                                                              | 1.2       | 16.2   | M+Na   | 1+ |

CENTRE COMMUN DE SPECTROMETRIE DE MASSE

**Analysis Info**

Analysis Name Impact2\_210401\_05\_KO-359-P.d  
 Method Tune\_pos\_Standard.m  
 Comment

Acquisition Date 4/1/2021 12:44:27 PM  
 Instrument / Ser# impact II 1825265.1  
 0081

**Acquisition Parameter**

|             |          |                       |           |                  |           |
|-------------|----------|-----------------------|-----------|------------------|-----------|
| Source Type | ESI      | Ion Polarity          | Positive  | Set Nebulizer    | 0.3 Bar   |
| Focus       | Active   | Set Capillary         | 4500 V    | Set Dry Heater   | 200 °C    |
| Scan Begin  | 50 m/z   | Set End Plate Offset  | -500 V    | Set Dry Gas      | 4.0 l/min |
| Scan End    | 1000 m/z | Set Collision Cell RF | 750.0 Vpp | Set Divert Valve | Source    |

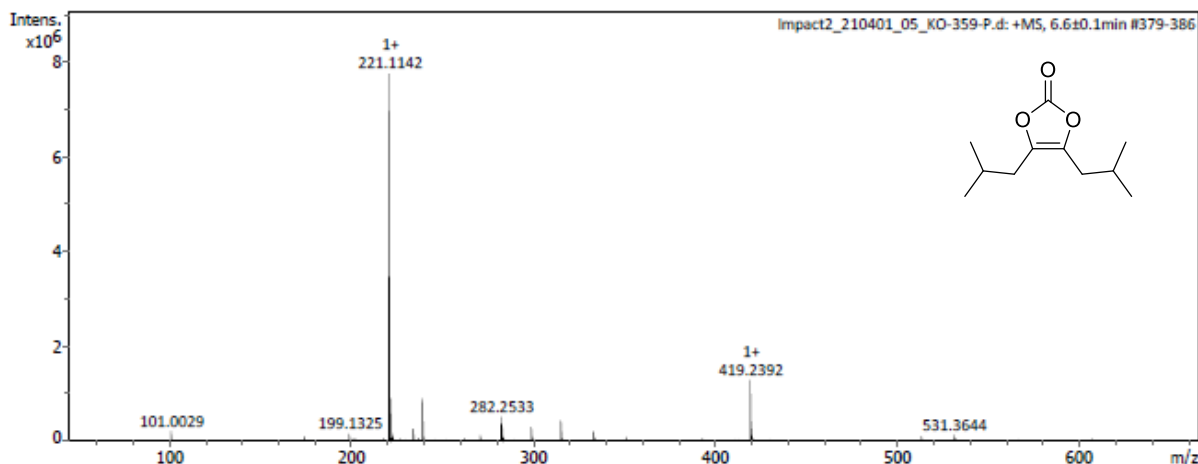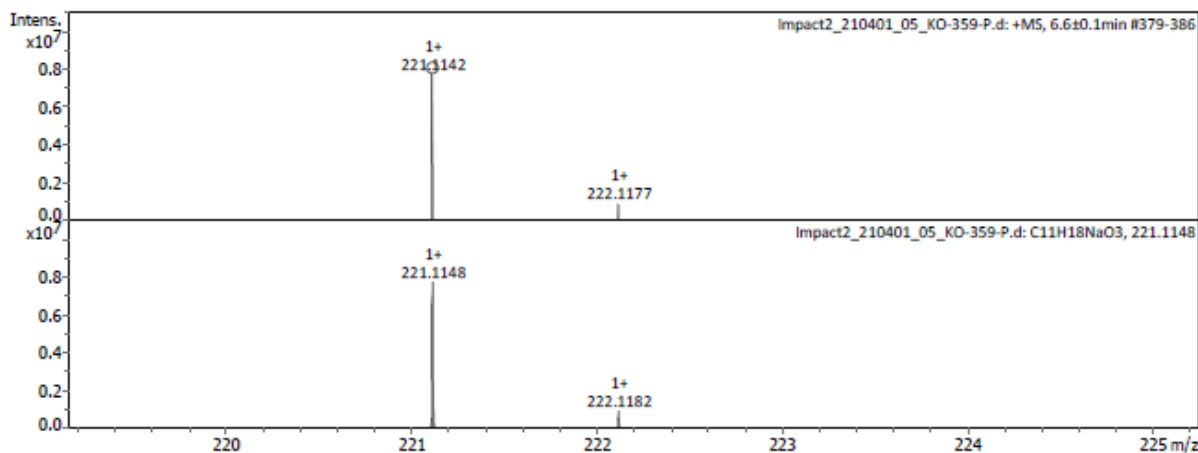

| Meas. m/z | Ion Formula | m/z      | Sum Formula | err [ppm] | mSigma | Adduct | z  |
|-----------|-------------|----------|-------------|-----------|--------|--------|----|
| 221.1142  | C11H18NaO3  | 221.1148 | C11H18O3    | 3.0       | 3.4    | M+Na   | 1+ |
| 419.2392  | C22H36NaO6  | 419.2404 |             | 2.9       | 0.9    | 2M+Na  | 1+ |

## 11. Size-exclusion chromatography (SEC)

Molecular weight measurements were performed using a size exclusion chromatography (SEC) from Malvern Panalytical (Viscotek TDA). Stabilized THF was used as the mobile phase at a flow rate of 1 mL min<sup>-1</sup> at 40 °C. Samples were injected at a concentration of about 3 mg mL<sup>-1</sup> after filtration through a 0.45 μm PTFE membrane. Separation was performed on three Agilent mixed C columns (SDVB, 5 μm, 300 x 7.5 mm). Molecular weights were determined using a conventional calibration curve based on certified PS standards (Polymer Standards Service) from 470 to 2,500,000 g mol<sup>-1</sup>. Omnisec 5.12 (Malvern Panalytical) software was used for data acquisition and processing.

### SEC of commercially available BPA-PC (Sigma-Aldrich, $M_w$ of about 45,000 g/mol).

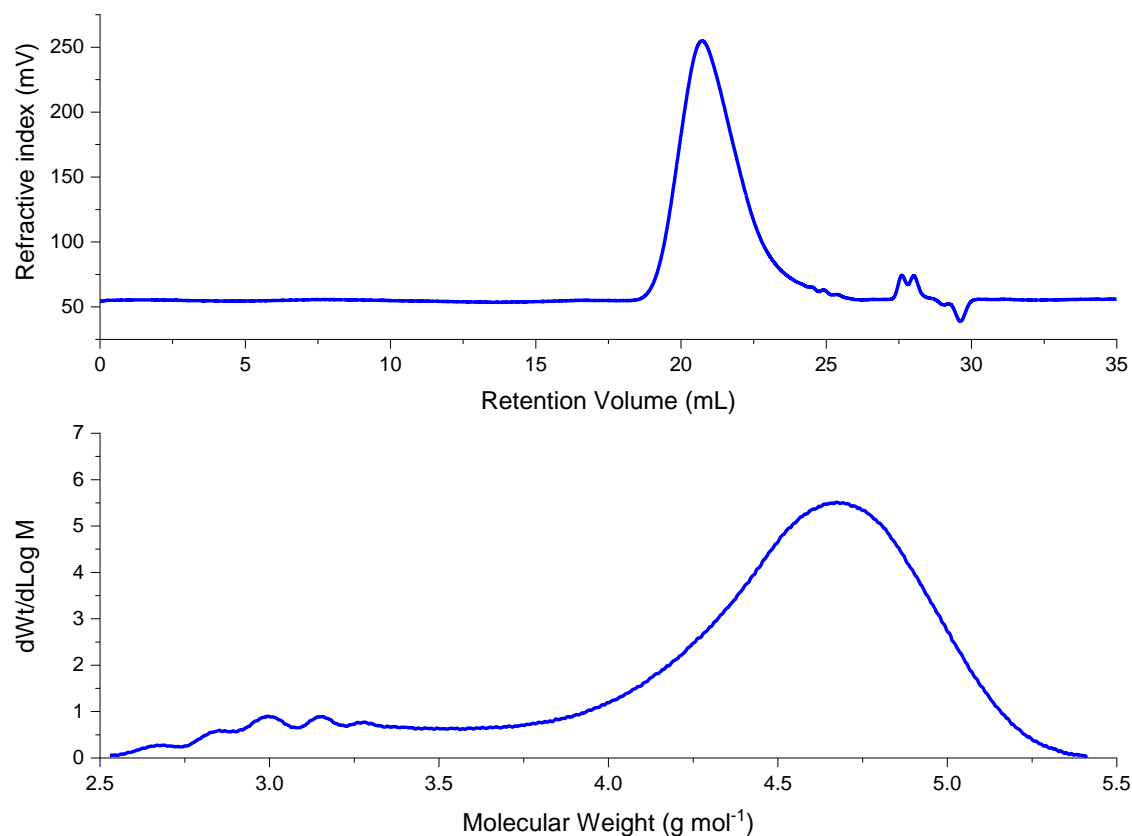

**Figure S13.** Chromatogram and molar mass distributions of commercially available BPA-PC obtained by SEC.

| <u>Sample Id</u>       | <u><math>M_w</math> (g mol<sup>-1</sup>)</u> | <u><math>M_n</math> (g mol<sup>-1</sup>)</u> |
|------------------------|----------------------------------------------|----------------------------------------------|
| BPA-PC (Sigma-Aldrich) | 42,560                                       | 7,290                                        |

**Table S1.** Average molecular weight values of commercially available BPA-PC ( $M_n$ , number average molecular weight and  $M_w$ , weight average molecular weight).

SEC of BPA-polycarbonate contained in CD, safety glasses and polycarbonate plate.

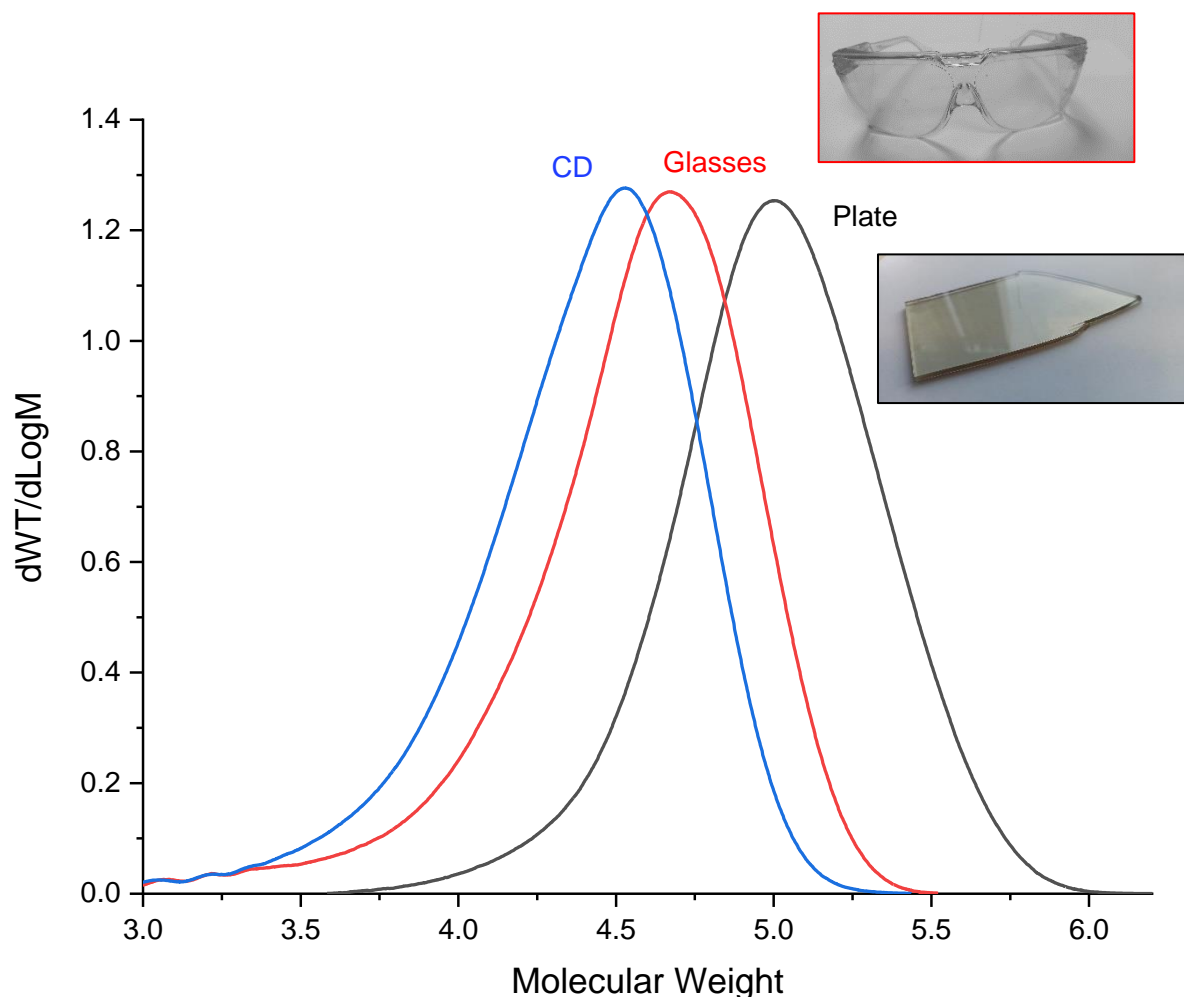

**Figure S14.** Molar mass distributions of BPA-polycarbonate contained in CD, safety glasses and polycarbonate plate obtained by SEC.

| Sample Id  | Mw (g mol <sup>-1</sup> ) | Mn (g mol <sup>-1</sup> ) |
|------------|---------------------------|---------------------------|
| PC plate   | 133,986                   | 72,545                    |
| PC glasses | 49,163                    | 21,704                    |
| PC CD      | 32,805                    | 16,200                    |

**Table S2.** Average molecular weight values of BPA-polycarbonate contained in CD, safety glasses and polycarbonate plate ( $M_n$ , number average molecular weight and  $M_w$ , weight average molecular weight).
